# Supplementary material for: An efficient synthesis of 2-thio-5-amino substituted benzoquinones via KI catalyzed cascade oxidation/Michael addition/oxidation starting from hydroquinone
Source: Royal Society of Chemistry journal article supplement (doi:10.1039/c5ra26524j), 2016-01-01
Supplement: c5ra26524j1.pdf [file c5ra26524j1.pdf]

**An Efficient Synthesis of 2-Thio-5-amino Substituted  
Benzoquinones *via* KI Catalyzed Cascade Oxidation/Michael  
addition/Oxidation Starting from Hydroquinone**

Yihuan Lu, Yuqiong Zhao, Shucheng Wang, Xin Wang, Zemei Ge\*, Runtao Li\*  
State Key Laboratory of Natural and Biomimetic Drugs, School of Pharmaceutical Science,  
Peking University, Beijing 100191, P. R. of China

**Content**

|                                                                        |    |
|------------------------------------------------------------------------|----|
| 1. General information.....                                            | 2  |
| 2. Synthesis of isothiuronium salts .....                              | 2  |
| 3. Synthesis of 2-(benzylthio)cyclohexa-2,5-diene-1,4-dione (7c) ..... | 4  |
| 4. Preparation for 2-thio-5-amino substituted benzoquinones .....      | 4  |
| 5. Spectra of compounds.....                                           | 13 |
| References .....                                                       | 48 |

## 1. General information

All experiments were carried out under air unless otherwise indicated.  $^1\text{H}$  NMR and  $^{13}\text{C}$  NMR spectra were recorded with a Bruker AVIII-400/600 spectrometer at ambient temperature with  $\text{CDCl}_3$ ,  $\text{D}_2\text{O}$  or  $\text{DMSO-d}_6$  as the solvent using tetramethylsilane (TMS) as internal standard unless otherwise noted. High-resolution mass spectra were recorded by Bruker Apex IV Fourier Transform Ion Cyclotron Resonance Mass Spectrometer spectrometer (HRMS). All melting points were measured on a melting point apparatus with uncorrected thermometers.

## 2. Synthesis of isothiuronium salts (3)

**S-Methylisothiourea Hemisulfate Salt (3h)** was purchased from *accela*.

### General preparation for isothiuronium salts (3)

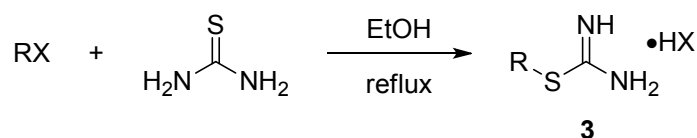

To the solution of thiourea (3.806 g, 50 mmol) in EtOH (50 mL) was added alkyl halide (55 mmol). The mixture was kept refluxing in oil bath. The completion of the reaction was monitored by TLC. The solvent was removed and the residue was recrystallized from EtOH/EtOAc.

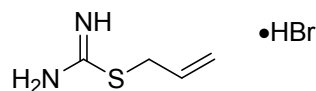

**S-Allylthiuronium bromide (3a):** Obtained in 92% yield (9.062 g), white solid; m.p. 79.4-79.8°C (Lit.3 74-76°C);  $^1\text{H}$  NMR (400 MHz,  $\text{D}_2\text{O}$ )  $\delta$  5.94 (ddt,  $J = 16.8, 10.1, 6.5$  Hz, 1H), 5.44 (dd,  $J = 17.0, 1.0$  Hz, 1H), 5.32 (dd,  $J = 10.2, 0.9$  Hz, 1H), 3.82 (m, 2H);  $^{13}\text{C}$  NMR (101 MHz,  $\text{D}_2\text{O}$ )  $\delta$  170.9, 130.6, 120.3, 33.8

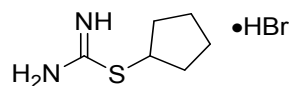

**S-Cyclopentylthiuronium bromide (3b):** Obtained in 92% yield (10.350 g), white solid; m.p. 140.4-141.2°C;  $^1\text{H}$  NMR (400 MHz,  $\text{D}_2\text{O}$ )  $\delta$  4.01-3.69 (m, 1H), 2.29-2.08 (m, 2H), 1.66 (ddd,  $J = 15.7, 9.2, 5.1$  Hz, 6H);  $^{13}\text{C}$  NMR (101 MHz,  $\text{D}_2\text{O}$ )  $\delta$  171.7, 43.9, 32.9, 24.3

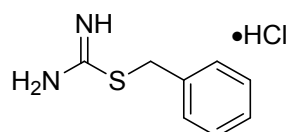

**S-Benzylthiuronium chloride (3c):** Obtained in 93% yield (9.393 g), white solid; m.p. 145.0-

145.5°C(Lit.4 146-148°C); <sup>1</sup>H NMR (400 MHz, D<sub>2</sub>O) δ 7.50-7.14 (m, 5H), 4.28 (s, 2H); <sup>13</sup>C NMR (101 MHz, D<sub>2</sub>O) δ 170.5, 133.9, 129.2, 128.9, 128.5, 35.1

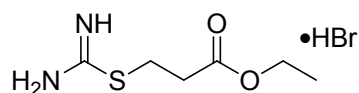

**Ethyl 3-(carbamimidoylthio)propanoate hydrobromide (3e):** Obtained in 86% yield (10.965 g), white solid; m.p. 85.6-86.2°C; <sup>1</sup>H NMR (400 MHz, D<sub>2</sub>O) δ 4.13 (q, *J* = 7.1 Hz, 2H), 3.32 (t, *J* = 6.7 Hz, 2H), 2.80 (t, *J* = 6.7 Hz, 2H), 1.19 (t, *J* = 7.2 Hz, 3H); <sup>13</sup>C NMR (101 MHz, D<sub>2</sub>O) δ 173.4, 170.9, 62.3, 33.5, 26.0, 13.3

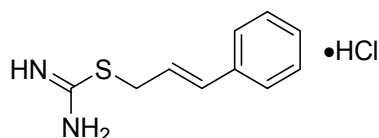

**S-Cinnamylisothiuronium chloride (3f):** Obtained in 81% yield (9.234 g), white solid, m.p. 166.7-167.6°C; <sup>1</sup>H NMR (400 MHz, D<sub>2</sub>O) δ 7.54-7.16 (m, 5H), 6.67 (d, *J* = 15.8 Hz, 1H), 6.37-6.09 (m, 1H), 3.85 (d, *J* = 7.1 Hz, 2H); <sup>13</sup>C NMR (101 MHz, D<sub>2</sub>O) δ 170.7, 135.9, 134.6, 129.0, 128.5, 126.6, 121.9, 33.5.

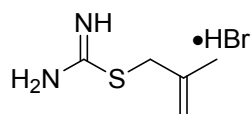

**S-Methallylisothiuronium bromide (3g):** Obtained in 93% yield (9.811 g), white solid; m.p. 126.1-126.4°C; <sup>1</sup>H NMR (400 MHz, D<sub>2</sub>O) δ 5.06 (s, 1H), 5.01 (s, 1H), 3.74 (s, 2H), 1.79 (s, 3H); <sup>13</sup>C NMR (101 MHz, D<sub>2</sub>O) δ 139.0, 115.6, 38.0, 20.0

#### 4-Isothioureidobutyronitrile hydrochloride (3d)

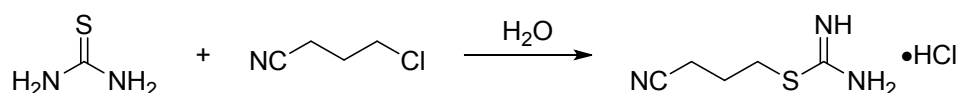

Redistilled 4-chlorobutyronitrile (7.663 g, 74 mmol) was added to a solution of thiourea (7.612 g, 100 mmol) in water (5.0 mL), and the mixture was refluxed for 3 h. Acetone (100 mL) was added to the solution, the mixture was filtered, and the cake was washed with acetone and diethyl ether and air-dried overnight.<sup>1</sup> Obtained **3d** in 83% yield (10.994 g), white solid; m.p. 130.1-130.9°C (Lit.2 125-127°C); <sup>1</sup>H NMR (400 MHz, D<sub>2</sub>O) δ 3.20 (t, *J* = 7.2 Hz, 2H), 2.61 (t, *J* = 7.1 Hz, 2H), 2.11-1.94 (m, 2H); <sup>13</sup>C NMR (101 MHz, D<sub>2</sub>O) δ 170.6, 120.6, 29.5, 24.0, 15.4

### 3. Synthesis of 2-(benzylthio)cyclohexa-2,5-diene-1,4-dione (7c)

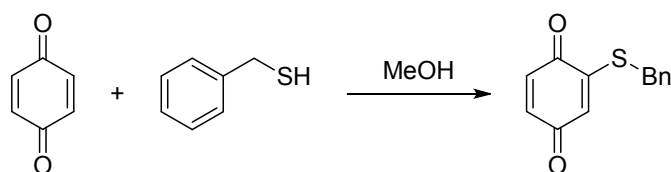

To a suspension of finely divided 1,4-benzoquinone (0.108 g, 1 mmol) in methanol (5 mL) was added a solution of benzyl mercaptan (0.124 g, 1 mmol) in methanol (1 mL). The mixture was stirred for 5 min and water (10 mL) was added, the solid was filtered off, which was then purified by silica gel column (EtOAc/petroleum ether) to give the orange solid in 68% yield (0.156 g).<sup>5</sup>

<sup>1</sup>H NMR (400 MHz, CDCl<sub>3</sub>) δ 7.45-7.29 (m, 5H), 6.82 (d, *J* = 10.1 Hz, 1H), 6.73 (dd, *J* = 10.1, 2.3 Hz, 1H), 6.48 (d, *J* = 2.2 Hz, 1H), 4.03 (s, 2H); <sup>13</sup>C NMR (101 MHz, CDCl<sub>3</sub>) δ 184.0, 183.8, 152.4, 137.5, 136.1, 133.8, 129.0, 128.9, 128.1, 125.4, 35.3.

### 4. Preparation for 2-thio-5-amino substituted benzoquinones (4)

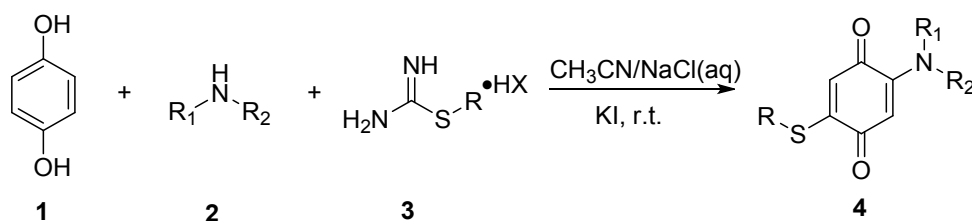

#### 2-(Allylthio)-5-(cyclohexylamino)-2,5-cyclohexadiene-1,4-dione (4aa). Typical Procedure:

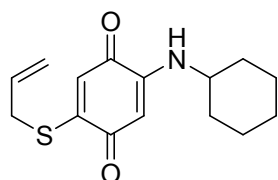

To the solution of hydroquinone (0.110 g, 1 mmol), *S*-Allylthiourenium bromide (0.197 g, 1 mmol), potassium iodide (0.050 g, 0.3 mmol) in CH<sub>3</sub>CN/NaCl (aq., saturated, 20 mL/5 mL) was added cyclohexylamine (0.297 g, 3 mmol). The mixture was stirred at room temperature for 12h until the consumption of hydroquinone on TLC indicated by iodine vapor, then diluted with saturated brine (20 mL), and extracted with EtOAc (3×20 mL). The combined organic layers were dried with anhydrous Na<sub>2</sub>SO<sub>4</sub>. The solvent was removed and the residue was purified by silica gel column (EtOAc/petroleum ether) to give the desired product **4aa** in 73% yield (0.202 g). red solid, m.p. 92.5-93.4°C; <sup>1</sup>H NMR (400 MHz, CDCl<sub>3</sub>) δ 6.23 (s, 1H), 5.87 (ddt, *J* = 16.6, 10.1, 6.4 Hz, 2H), 5.51 (s, 1H), 5.39 (dd, *J* = 17.0, 1.1 Hz, 1H), 5.28 (dd, *J* = 10.1, 1.0 Hz, 1H), 3.45 (d, *J* = 6.4 Hz, 2H), 3.33-3.16 (m, 1H), 2.08-1.88 (m, 2H), 1.90-1.72 (m, 2H), 1.66 (d, *J* = 5.8 Hz, 1H), 1.31 (ddd, *J* = 24.4, 14.5, 2.9 Hz, 5H); <sup>13</sup>C NMR (101 MHz, CDCl<sub>3</sub>) δ 181.0, 179.4, 158.7, 146.2, 130.4, 120.3, 119.8, 96.8, 51.3, 33.4, 31.8, 25.4, 24.5; HRMS (ESI): *m/z* calcd for C<sub>15</sub>H<sub>20</sub>NO<sub>2</sub>S [M+H]<sup>+</sup>: 278.12093, found: 278.12107.

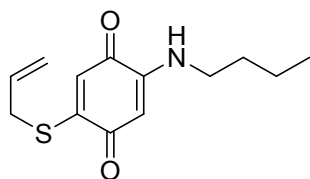

**2-(Allylthio)-5-(butylamino)-2,5-cyclohexadiene-1,4-dione (4ab):** Obtained in 71% yield (0.178 g), red solid, m.p. 83.5-84.2°C; <sup>1</sup>H NMR (400 MHz, CDCl<sub>3</sub>) δ 6.24 (s, 1H), 6.12-5.73 (m, 2H), 5.49 (s, 1H), 5.40 (dd, *J* = 17.0, 1.0 Hz, 1H), 5.29 (dd, *J* = 10.1, 1.0 Hz, 1H), 3.46 (d, *J* = 6.5 Hz, 2H), 3.13 (dd, *J* = 13.2, 6.9 Hz, 2H), 1.70-1.60 (m, 2H), 1.49-1.36 (m, 2H), 0.97 (t, *J* = 7.3 Hz, 3H); <sup>13</sup>C NMR (101 MHz, CDCl<sub>3</sub>) δ 181.1, 179.3, 158.7, 147.5, 130.4, 120.3, 119.8, 96.8, 42.3, 33.4, 30.2, 20.1, 13.6; HRMS (ESI): *m/z* calcd for C<sub>13</sub>H<sub>18</sub>NO<sub>2</sub>S [M+H]<sup>+</sup>: 252.10528, found: 252.10575.

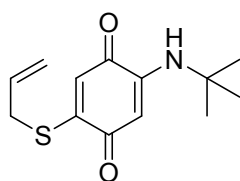

**2-(Allylthio)-5-(tert-butylamino)-2,5-cyclohexadiene-1,4-dione (4ac):** Obtained in 50% yield (0.125 g), red solid, m.p. 113.9-114.6°C; <sup>1</sup>H NMR (400 MHz, CDCl<sub>3</sub>) δ 6.24 (s, 1H), 5.96 (br, 1H), 5.91-5.80 (m, 1H), 5.71 (s, 1H), 5.39 (dd, *J* = 17.0, 1.0 Hz, 1H), 5.28 (dd, *J* = 10.1, 1.0 Hz, 1H), 3.45 (d, *J* = 6.4 Hz, 2H), 1.40 (s, 9H); <sup>13</sup>C NMR (101 MHz, CDCl<sub>3</sub>) δ 180.8, 179.7, 158.2, 145.2, 130.36, 120.4, 119.8, 98.8, 51.9, 33.3, 28.3; HRMS (ESI): *m/z* calcd for C<sub>13</sub>H<sub>18</sub>NO<sub>2</sub>S [M+H]<sup>+</sup>: 252.10528, found: 252.10574.

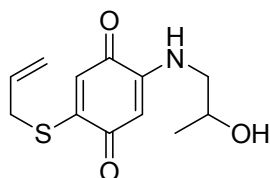

**2-(Allylthio)-5-((2-hydroxypropyl)amino)-2,5-cyclohexadiene-1,4-dione (4ad):** Obtained in 72% yield (0.182 g), red solid, m.p. 100.6-101.4°C; <sup>1</sup>H NMR (400 MHz, CDCl<sub>3</sub>) δ 6.28 (s, 1H), 6.23 (s, 1H), 5.86 (ddt, *J* = 16.7, 10.1, 6.5 Hz, 1H), 5.50 (s, 1H), 5.39 (d, *J* = 17.0 Hz, 1H), 5.28 (d, *J* = 10.1 Hz, 1H), 4.10 (s, 1H), 3.45 (d, *J* = 6.4 Hz, 2H), 3.20 (ddd, *J* = 13.7, 6.3, 3.7 Hz, 1H), 3.08 (ddd, *J* = 13.6, 7.8, 5.5 Hz, 1H), 2.23 (d, *J* = 37.2 Hz, 1H), 1.30 (d, *J* = 6.3 Hz, 3H); <sup>13</sup>C NMR (101 MHz, CDCl<sub>3</sub>) δ 181.3, 179.1, 158.5, 147.7, 130.3, 120.4, 119.9, 97.2, 65.6, 49.4, 33.4, 21.3; HRMS (ESI): *m/z* calcd for C<sub>12</sub>H<sub>16</sub>NO<sub>3</sub>S [M+H]<sup>+</sup>: 254.08454, found: 254.08478.

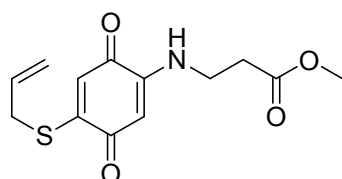

**Methyl 3-((4-(allylthio)-3,6-dioxocyclohexa-1,4-dien-1-yl)amino)propanoate (4ae):** Obtained

in 61% yield (0.171 g), red solid, m.p. 94.0-94.9°C; <sup>1</sup>H NMR (400 MHz, CDCl<sub>3</sub>) δ 6.25 (s, 1H), 6.17 (s, 1H), 5.87 (ddt, *J* = 16.7, 10.1, 6.5 Hz, 1H), 5.52 (s, 1H), 5.39 (dd, *J* = 17.0, 0.9 Hz, 1H), 5.29 (d, *J* = 10.1 Hz, 1H), 3.74 (s, 3H), 3.46 (q, *J* = 6.3 Hz, 4H), 2.66 (t, *J* = 6.4 Hz, 2H); <sup>13</sup>C NMR (101 MHz, CDCl<sub>3</sub>) δ 181.3, 179.0, 171.5, 158.3, 147.1, 130.3, 120.5, 119.9, 97.2, 52.1, 37.9, 33.4, 32.4; HRMS (ESI): *m/z* calcd for C<sub>13</sub>H<sub>16</sub>NO<sub>4</sub>S [M+H]<sup>+</sup>: 282.07946, found: 282.07982.

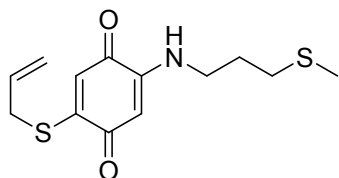

**2-(Allylthio)-5-((3-methylthio)propylamino)-2,5-cyclohexadiene-1,4-dione (4af):** Obtained in 62% yield (0.175 g), red solid, m.p. 66.7-67.5°C; <sup>1</sup>H NMR (400 MHz, CDCl<sub>3</sub>) δ 6.24 (s, 1H), 6.00 (s, 1H), 5.87 (ddt, *J* = 16.7, 10.1, 6.5 Hz, 1H), 5.53 (s, 1H), 5.39 (dd, *J* = 17.0, 1.0 Hz, 1H), 5.29 (dd, *J* = 10.1, 0.9 Hz, 1H), 3.46 (d, *J* = 6.5 Hz, 2H), 3.29 (q, *J* = 6.6 Hz, 2H), 2.58 (t, *J* = 6.9 Hz, 2H), 2.12 (s, 3H), 1.95 (p, *J* = 6.9 Hz, 2H); <sup>13</sup>C NMR (101 MHz, CDCl<sub>3</sub>) δ 181.1, 179.2, 158.6, 147.4, 130.3, 120.4, 119.9, 97.1, 41.3, 33.4, 31.5, 27.1, 15.6; HRMS (ESI): *m/z* calcd for C<sub>13</sub>H<sub>18</sub>NO<sub>2</sub>S<sub>2</sub> [M+H]<sup>+</sup>: 284.07735, found: 284.07760.

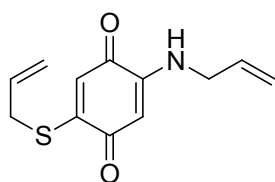

**2-(Allylamino)-5-(allylthio)-2,5-cyclohexadiene-1,4-dione (4ag):** Obtained in 60% yield (0.141 g), red solid, m.p. 108.5-109.4°C; <sup>1</sup>H NMR (400 MHz, CDCl<sub>3</sub>) δ 6.26 (s, 1H), 5.99 (s, 1H), 5.94-5.78 (m, 2H), 5.51 (s, 1H), 5.40 (d, *J* = 17.0 Hz, 1H), 5.34-5.24 (m, 3H), 3.79 (t, *J* = 5.7 Hz, 2H), 3.46 (d, *J* = 6.4 Hz, 2H); <sup>13</sup>C NMR (101 MHz, CDCl<sub>3</sub>) δ 181.3, 179.2, 158.4, 147.2, 131.3, 130.3, 120.4, 119.9, 118.4, 97.7, 44.9, 33.4; HRMS (ESI): *m/z* calcd for C<sub>12</sub>H<sub>14</sub>NO<sub>2</sub>S [M+H]<sup>+</sup>: 236.07398, found: 236.07443.

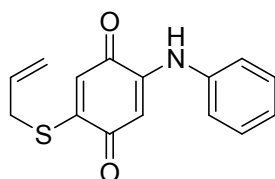

**2-(Allylthio)-5-(phenylamino)-2,5-cyclohexadiene-1,4-dione (4ah):** Obtained in 40% yield (0.108 g), red solid, m.p. 266.4-267.3°C; <sup>1</sup>H NMR (400 MHz, CDCl<sub>3</sub>) δ 7.53 (s, 1H), 7.42 (dd, *J* = 8.5, 7.3 Hz, 2H), 7.23 (t, *J* = 7.8 Hz, 3H), 6.36 (s, 1H), 6.19 (s, 1H), 5.89 (ddt, *J* = 16.7, 10.1, 6.4 Hz, 1H), 5.42 (dd, *J* = 17.0, 1.0 Hz, 1H), 5.32 (dd, *J* = 10.1, 0.9 Hz, 1H), 3.50 (d, *J* = 6.4 Hz, 2H); <sup>13</sup>C NMR (101 MHz, CDCl<sub>3</sub>) δ 182.4, 179.4, 157.9, 143.9, 137.2, 130.2, 129.7, 125.8, 122.4, 120.6, 112.0, 99.9, 33.4; HRMS (ESI): *m/z* calcd for C<sub>15</sub>H<sub>14</sub>NO<sub>2</sub>S [M+H]<sup>+</sup>: 272.07398, found: 272.07423.

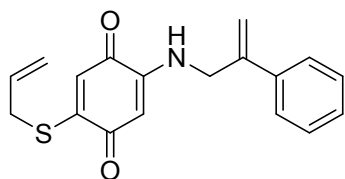

**2-(Allylthio)-5-((2-phenylallyl)amino)-2,5-cyclohexadiene-1,4-dione (4ai):** Obtained in 69% yield (0.214 g), red solid, m.p. 129.7-130.5°C;  $^1\text{H}$  NMR (400 MHz,  $\text{CDCl}_3$ )  $\delta$  7.48-7.30 (m, 5H), 6.24 (s, 1H), 6.03 (s, 1H), 5.94-5.79 (m, 1H), 5.59 (s, 1H), 5.56 (s, 1H), 5.39 (dd,  $J = 17.0, 1.0$  Hz, 1H), 5.31-5.28 (m, 1H), 5.28 (s, 1H), 4.18 (d,  $J = 5.9$  Hz, 2H), 3.46 (d,  $J = 6.5$  Hz, 2H);  $^{13}\text{C}$  NMR (101 MHz,  $\text{CDCl}_3$ )  $\delta$  181.3, 179.1, 158.3, 147.2, 141.8, 138.0, 130.3, 128.7, 128.4, 126.0, 120.5, 119.9, 115.1, 97.9, 46.5, 33.4; HRMS (ESI):  $m/z$  calcd for  $\text{C}_{18}\text{H}_{18}\text{NO}_2\text{S}$   $[\text{M}+\text{H}]^+$ : 312.10528, found: 312.10531.

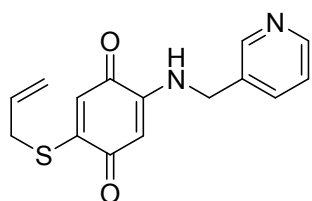

**2-(Allylthio)-5-((pyridin-3-ylmethyl)amino)-2,5-cyclohexadiene-1,4-dione (4aj):** Obtained in 73% yield (0.208 g), red solid, m.p. 117.2-118.0°C;  $^1\text{H}$  NMR (400 MHz,  $\text{CDCl}_3$ )  $\delta$  8.71-8.56 (m, 2H), 7.62 (d,  $J = 7.8$  Hz, 1H), 7.33 (dd,  $J = 7.8, 4.9$  Hz, 1H), 6.28 (s, 1H), 6.18 (s, 1H), 5.87 (ddt,  $J = 16.7, 10.1, 6.4$  Hz, 1H), 5.54 (s, 1H), 5.40 (d,  $J = 17.0$  Hz, 1H), 5.30 (d,  $J = 10.1$  Hz, 1H), 4.37 (d,  $J = 5.9$  Hz, 2H), 3.47 (d,  $J = 6.4$  Hz, 2H);  $^{13}\text{C}$  NMR (101 MHz,  $\text{CDCl}_3$ )  $\delta$  181.4, 179.0, 158.2, 149.7, 149.1, 147.0, 135.2, 131.3, 130.2, 123.8, 120.6, 112.0, 98.4, 44.2, 33.4; HRMS (ESI):  $m/z$  calcd for  $\text{C}_{15}\text{H}_{15}\text{N}_2\text{O}_2\text{S}$   $[\text{M}+\text{H}]^+$ : 287.08487, found: 287.08508.

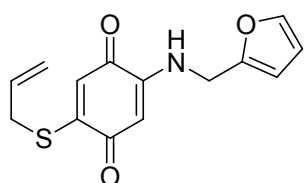

**2-(Allylthio)-5-((furan-2-ylmethyl)amino)-2,5-cyclohexadiene-1,4-dione (4ak):** Obtained in 61% yield (0.166 g), red solid, m.p. 124.4-124.8°C;  $^1\text{H}$  NMR (400 MHz,  $\text{CDCl}_3$ )  $\delta$  7.41 (s, 1H), 6.37 (d,  $J = 2.6$  Hz, 1H), 6.32 (d,  $J = 3.1$  Hz, 1H), 6.26 (s, 1H), 6.12 (s, 1H), 5.87 (ddt,  $J = 16.5, 9.9, 6.4$  Hz, 1H), 5.63 (s, 1H), 5.40 (d,  $J = 17.0$  Hz, 1H), 5.29 (d,  $J = 10.1$  Hz, 1H), 4.31 (d,  $J = 5.8$  Hz, 2H), 3.46 (d,  $J = 6.4$  Hz, 2H);  $^{13}\text{C}$  NMR (101 MHz,  $\text{CDCl}_3$ )  $\delta$  181.4, 179.1, 158.2, 148.7, 146.9, 142.9, 130.3, 120.5, 119.9, 110.6, 108.8, 97.9, 39.6, 33.4; HRMS (ESI):  $m/z$  calcd for  $\text{C}_{14}\text{H}_{14}\text{NO}_3\text{S}$   $[\text{M}+\text{H}]^+$ : 276.06889, found: 276.06957.

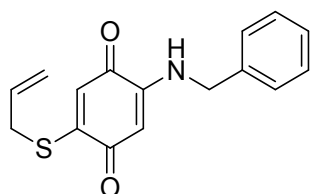

**2-(Allylthio)-5-(benzylamino)-2,5-cyclohexadiene-1,4-dione (4al):** Obtained in 69% yield (0.196 g), red solid, m.p. 109.0-109.9°C; <sup>1</sup>H NMR (400 MHz, CDCl<sub>3</sub>) δ 7.41-7.30 (m, 5H), 6.26 (s, 1H), 6.19 (s, 1H), 5.87 (ddt, *J* = 16.7, 10.1, 6.4 Hz, 1H), 5.55 (s, 1H), 5.40 (dd, *J* = 17.0, 1.0 Hz, 1H), 5.29 (dd, *J* = 10.1, 0.8 Hz, 1H), 4.32 (d, *J* = 5.8 Hz, 2H), 3.46 (d, *J* = 6.4 Hz, 2H); <sup>13</sup>C NMR (101 MHz, CDCl<sub>3</sub>) δ 181.3, 179.2, 158.4, 147.2, 135.6, 130.3, 129.0, 128.2, 127.7, 120.5, 119.9, 97.9, 46.8, 33.4; HRMS (ESI): *m/z* calcd for C<sub>16</sub>H<sub>16</sub>NO<sub>2</sub>S [M+H]<sup>+</sup>: 286.08963, found: 286.08984.

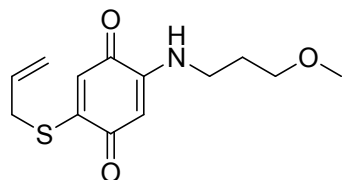

**2-(Allylthio)-5-((3-methoxypropyl)amino)-2,5-cyclohexadiene-1,4-dione (4am):** Obtained in 65% yield (0.173 g), red solid, m.p. 77.3-77.6°C; <sup>1</sup>H NMR (400 MHz, CDCl<sub>3</sub>) δ 6.38 (br, 1H), 6.23 (s, 1H), 5.87 (ddt, *J* = 16.7, 10.2, 6.5 Hz, 1H), 5.49 (s, 1H), 5.39 (d, *J* = 17.0 Hz, 1H), 5.28 (d, *J* = 10.1 Hz, 1H), 3.50 (t, *J* = 5.6 Hz, 2H), 3.46 (d, *J* = 6.4 Hz, 2H), 3.38 (s, 3H), 3.25 (dd, *J* = 12.4, 6.3 Hz, 2H), 1.97-1.87 (m, 2H); <sup>13</sup>C NMR (101 MHz, CDCl<sub>3</sub>) δ 181.1, 179.2, 158.6, 147.7, 130.4, 120.4, 119.8, 96.63, 70.7, 58.9, 40.8, 33.4, 28.0; HRMS (ESI): *m/z* calcd for C<sub>13</sub>H<sub>18</sub>NO<sub>3</sub>S [M+H]<sup>+</sup>: 268.10019, found: 268.10042.

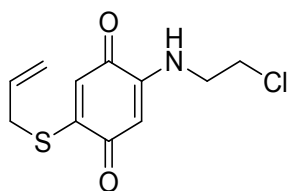

**2-(Allylthio)-5-((2-chloroethyl)amino)-2,5-cyclohexadiene-1,4-dione (4an):** Obtained in 48% yield (0.123 g), red solid, m.p. 102.9-103.4°C; <sup>1</sup>H NMR (400 MHz, CDCl<sub>3</sub>) δ 6.27 (s, 1H), 6.13 (br, 1H), 5.87 (ddt, *J* = 16.7, 10.1, 6.4 Hz, 1H), 5.53 (s, 1H), 5.40 (d, *J* = 17.0 Hz, 1H), 5.29 (d, *J* = 10.1 Hz, 1H), 3.72 (t, *J* = 5.8 Hz, 2H), 3.52 (dd, *J* = 11.8, 5.9 Hz, 2H), 3.47 (d, *J* = 6.4 Hz, 2H); <sup>13</sup>C NMR (101 MHz, CDCl<sub>3</sub>) δ 181.4, 178.8, 158.1, 147.0, 130.2, 120.6, 120.0, 97.8, 43.9, 41.3, 33.4; HRMS (ESI): *m/z* calcd for C<sub>11</sub>H<sub>13</sub>ClNO<sub>2</sub>S [M+H]<sup>+</sup>: 258.03500, found: 258.03482.

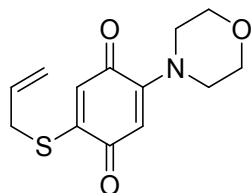

**2-(Allylthio)-5-morpholino-2,5-cyclohexadiene-1,4-dione (4ao):** Obtained in 82% yield (0.217 g), red solid, m.p. 120.3-121.1°C; <sup>1</sup>H NMR (400 MHz, CDCl<sub>3</sub>) δ 6.21 (s, 1H), 5.87 (ddt, *J* = 16.7, 10.1, 6.4 Hz, 1H), 5.77 (s, 1H), 5.39 (d, *J* = 16.9 Hz, 1H), 5.29 (d, *J* = 10.1 Hz, 1H), 3.86-3.81 (m, 4H), 3.53-3.49 (m, 4H), 3.46 (d, *J* = 6.4 Hz, 2H); <sup>13</sup>C NMR (101 MHz, CDCl<sub>3</sub>) δ 182.2, 181.0, 153.9, 152.1, 130.4, 123.7, 119.8, 107.6, 66.4, 49.0, 33.2; HRMS (ESI): *m/z* calcd for C<sub>13</sub>H<sub>16</sub>NO<sub>3</sub>S [M+H]<sup>+</sup>: 266.08454, found: 266.08469.



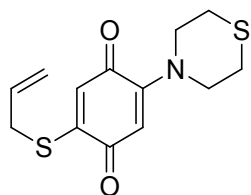

**2-(Allylthio)-5-thiomorpholino-2,5-cyclohexadiene-1,4-dione (4ap):** Obtained in 79% yield (0.222 g), red solid, m.p. 105.9-106.9°C;  $^1\text{H}$  NMR (400 MHz,  $\text{CDCl}_3$ )  $\delta$  6.19 (s, 1H), 5.86 (ddt,  $J = 16.7, 10.1, 6.5$  Hz, 1H), 5.77 (s, 1H), 5.38 (d,  $J = 17.0$  Hz, 1H), 5.28 (d,  $J = 10.1$  Hz, 1H), 3.84 (dd,  $J = 6.3, 3.8$  Hz, 4H), 3.45 (d,  $J = 6.4$  Hz, 2H), 2.81-2.70 (m, 4H);  $^{13}\text{C}$  NMR (101 MHz,  $\text{CDCl}_3$ )  $\delta$  181.9, 181.1, 154.1, 151.7, 130.4, 123.5, 119.8, 107.21, 51.8, 33.2, 27.1; HRMS (ESI):  $m/z$  calcd for  $\text{C}_{13}\text{H}_{16}\text{NO}_2\text{S}_2$   $[\text{M}+\text{H}]^+$ : 282.06170, found: 282.06208.

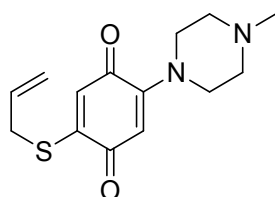

**2-(Allylthio)-5-(4-methylpiperazin-1-yl)-2,5-cyclohexadiene-1,4-dione (4aq):** Obtained in 79% yield (0.219 g), red solid, m.p. 172.4-173.3°C;  $^1\text{H}$  NMR (400 MHz,  $\text{CDCl}_3$ )  $\delta$  6.18 (s, 1H), 5.87 (ddt,  $J = 16.8, 10.1, 6.5$  Hz, 1H), 5.77 (s, 1H), 5.38 (d,  $J = 17.0$  Hz, 1H), 5.28 (d,  $J = 10.1$  Hz, 1H), 3.58-3.50 (m, 4H), 3.45 (d,  $J = 6.4$  Hz, 2H), 2.59-2.50 (m, 4H), 2.34 (s, 3H);  $^{13}\text{C}$  NMR (101 MHz,  $\text{CDCl}_3$ )  $\delta$  182.0, 181.2, 154.0, 152.3, 130.5, 123.6, 119.7, 107.3, 54.6, 48.8, 45.9, 33.2; HRMS (ESI):  $m/z$  calcd for  $\text{C}_{14}\text{H}_{19}\text{N}_2\text{O}_2\text{S}$   $[\text{M}+\text{H}]^+$ : 279.11617, found: 279.11656.

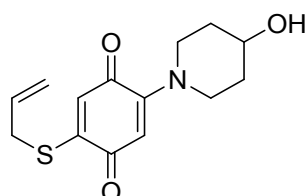

**2-(Allylthio)-5-(4-hydroxypiperidin-1-yl)-2,5-cyclohexadiene-1,4-dione (4ar):** Obtained in 75% yield (0.209 g), red solid, m.p. 84.4-85.2°C;  $^1\text{H}$  NMR (400 MHz,  $\text{CDCl}_3$ )  $\delta$  6.19 (s, 1H), 5.93-5.83 (m, 1H), 5.80 (s, 1H), 5.39 (d,  $J = 16.9$  Hz, 1H), 5.28 (d,  $J = 10.1$  Hz, 1H), 4.13-3.92 (m, 1H), 3.92-3.75 (m, 2H), 3.43 (d,  $J = 14.9$  Hz, 2H), 3.32 (ddd,  $J = 35.5, 19.4, 15.1$  Hz, 2H), 2.07-1.94 (m, 2H), 1.72-1.65 (m, 3H);  $^{13}\text{C}$  NMR (101 MHz,  $\text{CDCl}_3$ )  $\delta$  181.9, 181.2, 154.2, 152.3, 130.5, 123.5, 119.7, 106.6, 66.5, 46.3, 33.9, 33.2; HRMS (ESI):  $m/z$  calcd for  $\text{C}_{14}\text{H}_{18}\text{NO}_3\text{S}$   $[\text{M}+\text{H}]^+$ : 280.10019, found: 280.10053.

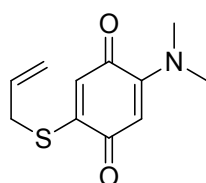

**2-(Allylthio)-5-(dimethylamino)-2,5-cyclohexadiene-1,4-dione (4as):** Obtained in 49% yield (0.109 g), red solid, m.p. 112.9-113.8°C;  $^1\text{H}$  NMR (400 MHz,  $\text{CDCl}_3$ )  $\delta$  6.14 (s, 1H), 5.86 (ddt,  $J$

= 16.7, 10.2, 6.5 Hz, 1H), 5.59 (s, 1H), 5.38 (dd,  $J = 17.0, 1.0$  Hz, 1H), 5.26 (d,  $J = 10.1$  Hz, 1H), 3.44 (d,  $J = 6.4$  Hz, 2H), 3.18 (s, 6H);  $^{13}\text{C}$  NMR (101 MHz,  $\text{CDCl}_3$ )  $\delta$  181.4, 180.9, 155.1, 151.0, 130.6, 122.64, 119.6, 102.8, 42.7, 33.2; HRMS (ESI):  $m/z$  calcd for  $\text{C}_{11}\text{H}_{14}\text{NO}_2\text{S}$   $[\text{M}+\text{H}]^+$ : 224.07398, found: 224.07432.

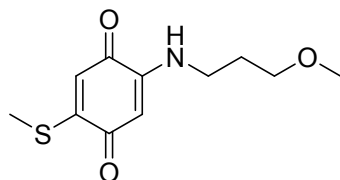

**2-((3-Methoxypropyl)amino)-5-(methylthio)-2,5-cyclohexadiene-1,4-dione (4mh):** Obtained in 62% yield (0.149 g), red solid, m.p. 77.9-78.8°C;  $^1\text{H}$  NMR (400 MHz,  $\text{CDCl}_3$ )  $\delta$  6.38 (d,  $J = 6.7$  Hz, 1H), 6.16 (s, 1H), 5.50 (s, 1H), 3.51 (t,  $J = 5.6$  Hz, 2H), 3.38 (s, 3H), 3.26 (dd,  $J = 12.5, 6.2$  Hz, 2H), 2.31 (s, 3H), 2.00-1.87 (m, 2H);  $^{13}\text{C}$  NMR (101 MHz,  $\text{CDCl}_3$ )  $\delta$  180.9, 179.1, 160.6, 147.9, 119.6, 96.5, 70.7, 58.9, 40.8, 28.0, 13.9; HRMS (ESI):  $m/z$  calcd for  $\text{C}_{11}\text{H}_{16}\text{NO}_3\text{S}$   $[\text{M}+\text{H}]^+$ : 242.08454, found: 242.08504.

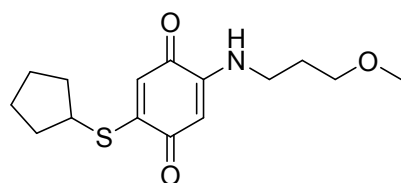

**2-(Cyclopentylthio)-5-((3-methoxypropyl)amino)-2,5-cyclohexadiene-1,4-dione (4mb):** Obtained in 68% yield (0.201 g), red solid, m.p. 82.8-83.7°C;  $^1\text{H}$  NMR (400 MHz,  $\text{CDCl}_3$ )  $\delta$  6.36 (br, 1H), 6.26 (s, 1H), 5.46 (s, 1H), 3.49 (t,  $J = 5.6$  Hz, 2H), 3.43-3.37 (m, 1H), 3.36 (s, 3H), 3.23 (dd,  $J = 12.5, 6.3$  Hz, 2H), 2.22-2.10 (m, 2H), 1.95-1.86 (m, 2H), 1.83-1.71 (m, 4H), 1.66 (dd,  $J = 8.5, 6.0$  Hz, 2H);  $^{13}\text{C}$  NMR (101 MHz,  $\text{CDCl}_3$ )  $\delta$  181.3, 179.2, 160.0, 147.8, 120.5, 96.6, 70.7, 58.8, 42.6, 40.7, 32.8, 28.0, 25.1; HRMS (ESI):  $m/z$  calcd for  $\text{C}_{15}\text{H}_{22}\text{NO}_3\text{S}$   $[\text{M}+\text{H}]^+$ : 296.13149, found: 296.13188.

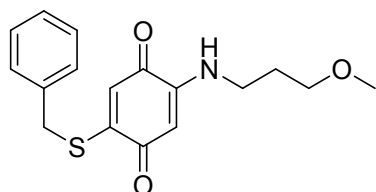

**2-(Benzylthio)-5-((3-methoxypropyl)amino)-2,5-cyclohexadiene-1,4-dione (4mc):** Obtained in 68% yield (0.216 g), red solid, m.p. 141.3-142.0°C;  $^1\text{H}$  NMR (400 MHz,  $\text{CDCl}_3$ )  $\delta$  7.36 (ddd,  $J = 20.3, 13.0, 7.2$  Hz, 5H), 6.37 (br, 1H), 6.27 (s, 1H), 5.49 (s, 1H), 4.00 (s, 2H), 3.50 (t,  $J = 5.6$  Hz, 2H), 3.38 (s, 3H), 3.25 (q,  $J = 6.3$  Hz, 2H), 2.02-1.85 (m, 2H);  $^{13}\text{C}$  NMR (101 MHz,  $\text{CDCl}_3$ )  $\delta$  181.0, 179.2, 158.9, 147.7, 134.2, 128.9, 128.9, 127.9, 120.3, 96.6, 70.7, 58.9, 40.8, 35.6, 28.0; HRMS (ESI):  $m/z$  calcd for  $\text{C}_{17}\text{H}_{20}\text{NO}_3\text{S}$   $[\text{M}+\text{H}]^+$ : 318.11584, found: 318.11637.

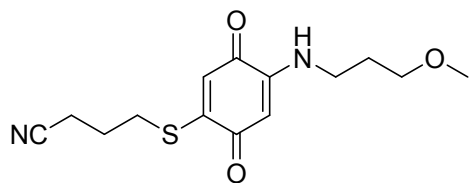

**4-((4-((3-Methoxypropyl)amino)-3,6-dioxocyclohexa-1,4-dien-1-yl)thio)butanenitrile (4md):**

Obtained in 71% yield (0.209 g), red solid, m.p. 111.5-112.2°C; <sup>1</sup>H NMR (400 MHz, CDCl<sub>3</sub>) δ 6.43 (br, 1H), 6.21 (s, 1H), 5.50 (s, 1H), 3.51 (t, *J* = 5.6 Hz, 2H), 3.38 (s, 3H), 3.26 (dd, *J* = 12.4, 6.2 Hz, 2H), 2.91 (t, *J* = 7.1 Hz, 2H), 2.58 (t, *J* = 7.0 Hz, 2H), 2.12 (p, *J* = 7.0 Hz, 2H), 1.97-1.88 (m, 2H); <sup>13</sup>C NMR (101 MHz, CDCl<sub>3</sub>) δ 180.6, 179.1, 158.0, 147.7, 120.2, 118.3, 96.6, 70.7, 58.9, 40.9, 28.7, 28.0, 23.4, 16.5; HRMS (ESI): *m/z* calcd for C<sub>14</sub>H<sub>19</sub>N<sub>2</sub>O<sub>3</sub>S [M+H]<sup>+</sup>: 295.11109, found: 295.11135.

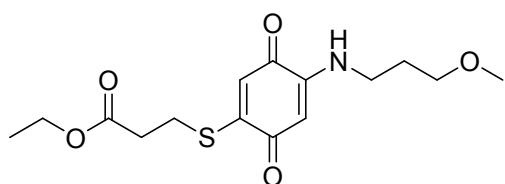

**Ethyl 3-((4-((3-methoxypropyl)amino)-3,6-dioxocyclohexa-1,4-dien-1-yl)thio)propanoate (4me):**

Obtained in 70% yield (0.229 g), red solid, m.p. 108.0-108.2°C; <sup>1</sup>H NMR (400 MHz, CDCl<sub>3</sub>) δ 6.40 (br, 1H), 6.23 (s, 1H), 5.49 (s, 1H), 4.19 (q, *J* = 7.1 Hz, 2H), 3.50 (t, *J* = 5.6 Hz, 2H), 3.37 (s, 3H), 3.25 (dd, *J* = 12.4, 6.2 Hz, 2H), 3.04 (t, *J* = 7.4 Hz, 2H), 2.72 (t, *J* = 7.4 Hz, 2H), 1.97-1.87 (m, 2H), 1.29 (t, *J* = 7.1 Hz, 3H); <sup>13</sup>C NMR (101 MHz, CDCl<sub>3</sub>) δ 180.8, 179.2, 170.9, 158.6, 147.7, 119.9, 96.6, 70.7, 61.2, 58.9, 40.8, 32.2, 28.0, 25.3, 14.2; HRMS (ESI): *m/z* calcd for C<sub>15</sub>H<sub>22</sub>NO<sub>5</sub>S [M+H]<sup>+</sup>: 328.12132, found: 328.12148.

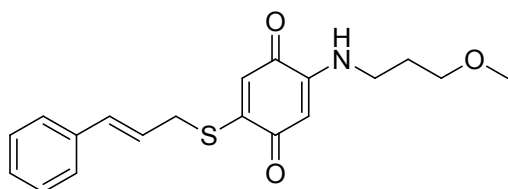

**2-(Cinnamylthio)-5-((3-methoxypropyl)amino)-2,5-cyclohexadiene-1,4-dione (4mf):**

Obtained in 63% yield (0.216 g), red solid, m.p. 102.0-102.7°C; <sup>1</sup>H NMR (400 MHz, CDCl<sub>3</sub>) δ 7.40-7.27 (m, 5H), 6.70 (d, *J* = 15.8 Hz, 1H), 6.39 (br, 1H), 6.30 (s, 1H), 6.22 (dt, *J* = 15.7, 6.9 Hz, 1H), 5.50 (s, 1H), 3.66-3.59 (m, 2H), 3.50 (t, *J* = 5.6 Hz, 2H), 3.37 (s, 3H), 3.25 (dd, *J* = 12.4, 6.2 Hz, 2H), 1.96-1.85 (m, 2H); <sup>13</sup>C NMR (101 MHz, CDCl<sub>3</sub>) δ 181.1, 179.2, 158.7, 147.7, 136.1, 134.7, 128.6, 128.1, 126.5, 121.5, 120.4, 96.6, 70.7, 58.9, 40.8, 33.1, 28.0; HRMS (ESI): *m/z* calcd for C<sub>19</sub>H<sub>22</sub>NO<sub>3</sub>S [M+H]<sup>+</sup>: 344.13149, found: 344.13150.

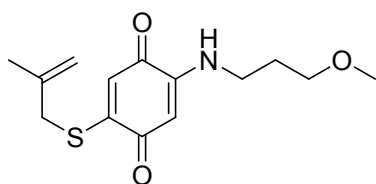

**2-((3-Methoxypropyl)amino)-5-((2-methylallyl)thio)-2,5-cyclohexadiene-1,4-dione (4mg):**

Obtained in 65% yield (0.182 g), red solid, m.p. 103.5-104.4°C; <sup>1</sup>H NMR (400 MHz, CDCl<sub>3</sub>) δ 6.37 (br, 1H), 6.22 (s, 1H), 5.48 (s, 1H), 5.09 (s, 1H), 5.02 (s, 1H), 3.50 (t, *J* = 5.6 Hz, 2H), 3.42 (s, 2H), 3.37 (s, 3H), 3.24 (dd, *J* = 12.4, 6.2 Hz, 2H), 1.92 (dd, *J* = 12.1, 6.0 Hz, 2H), 1.88 (d, *J* = 5.4 Hz, 3H); <sup>13</sup>C NMR (101 MHz, CDCl<sub>3</sub>) δ 181.1, 179.2, 159.1, 147.7, 138.0, 120.5, 115.5, 96.6, 70.7, 58.9, 40.80, 37.9, 28.0, 21.8; HRMS (ESI): *m/z* calcd for C<sub>14</sub>H<sub>20</sub>NO<sub>3</sub>S [M+H]<sup>+</sup>: 282.11584, found: 282.11581.

## 5. Spectra of compounds

$^1\text{H}$  NMR (400 MHz,  $\text{D}_2\text{O}$ ) of **3a**

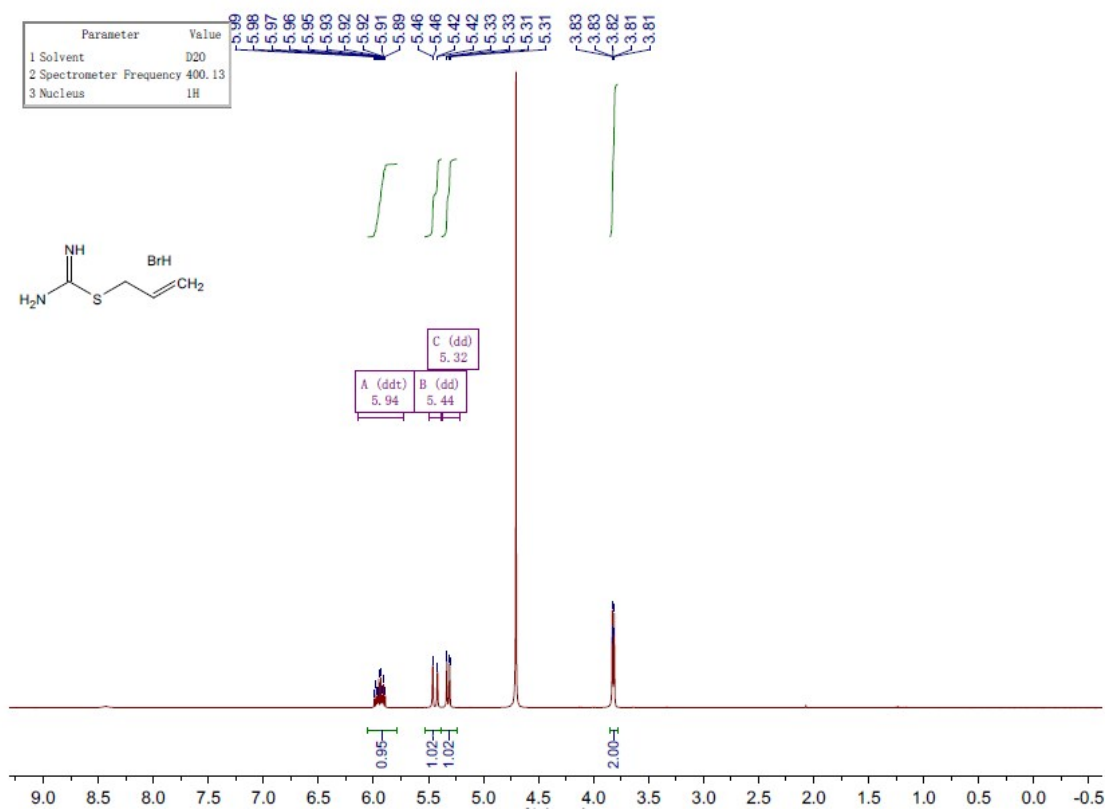

$^{13}\text{C}$  NMR (101 MHz,  $\text{D}_2\text{O}$ ) of **3a**

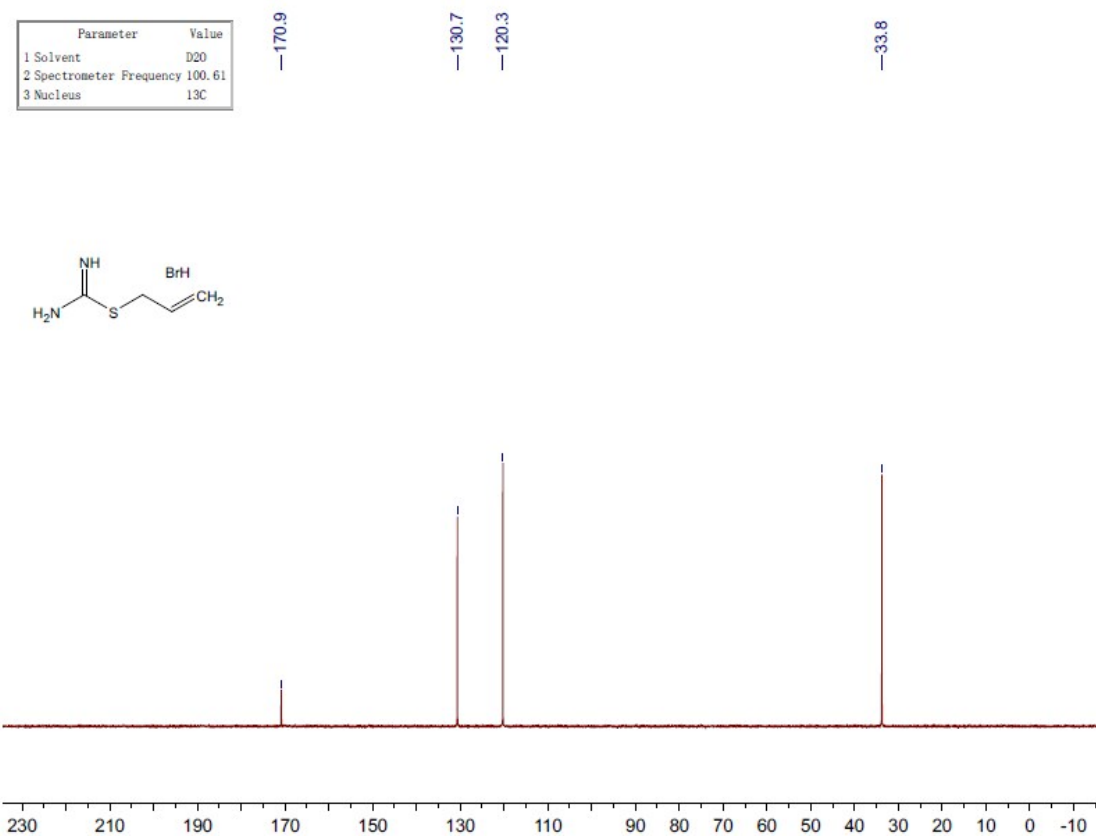

<sup>1</sup>H NMR (400 MHz, D<sub>2</sub>O) of **3b**

| Parameter                | Value  |
|--------------------------|--------|
| 1 Solvent                | D2O    |
| 2 Spectrometer Frequency | 400.13 |
| 3 Nucleus                | 1H     |

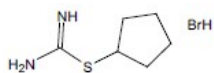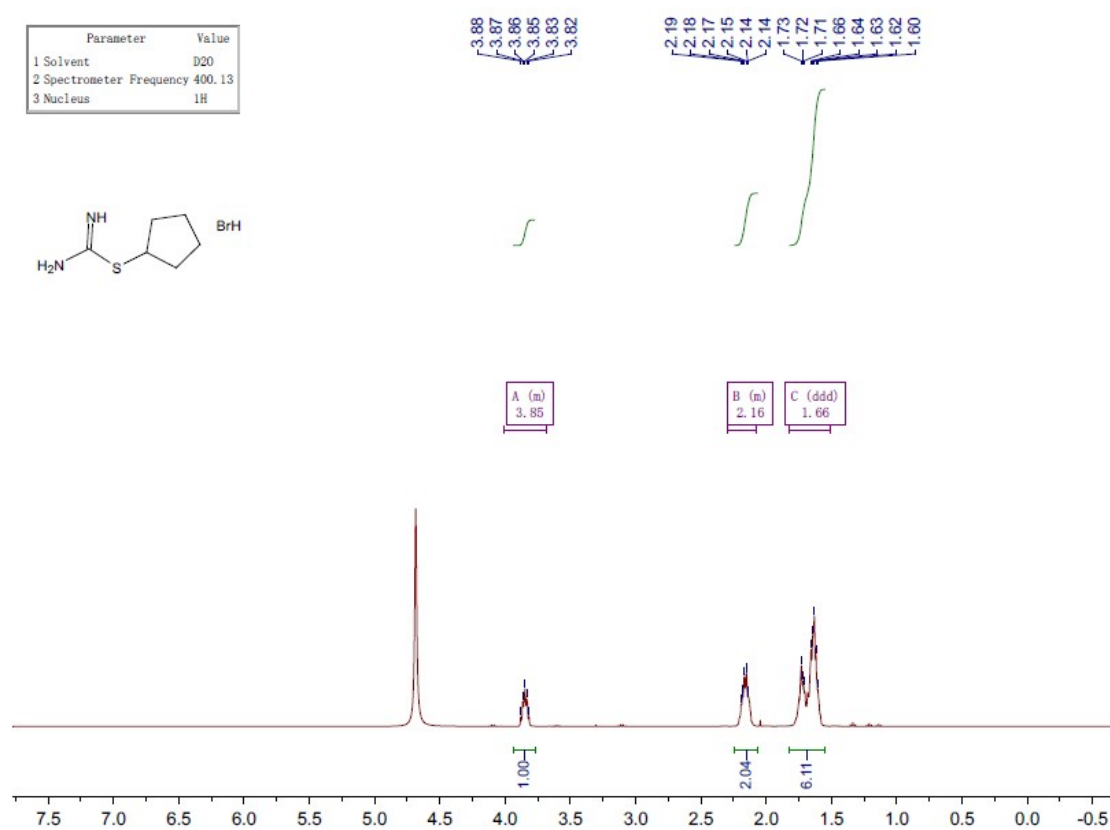

<sup>13</sup>C NMR (101 MHz, D<sub>2</sub>O) of **3b**

| Parameter                | Value  |
|--------------------------|--------|
| 1 Solvent                | D2O    |
| 2 Spectrometer Frequency | 100.61 |
| 3 Nucleus                | 13C    |

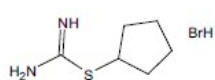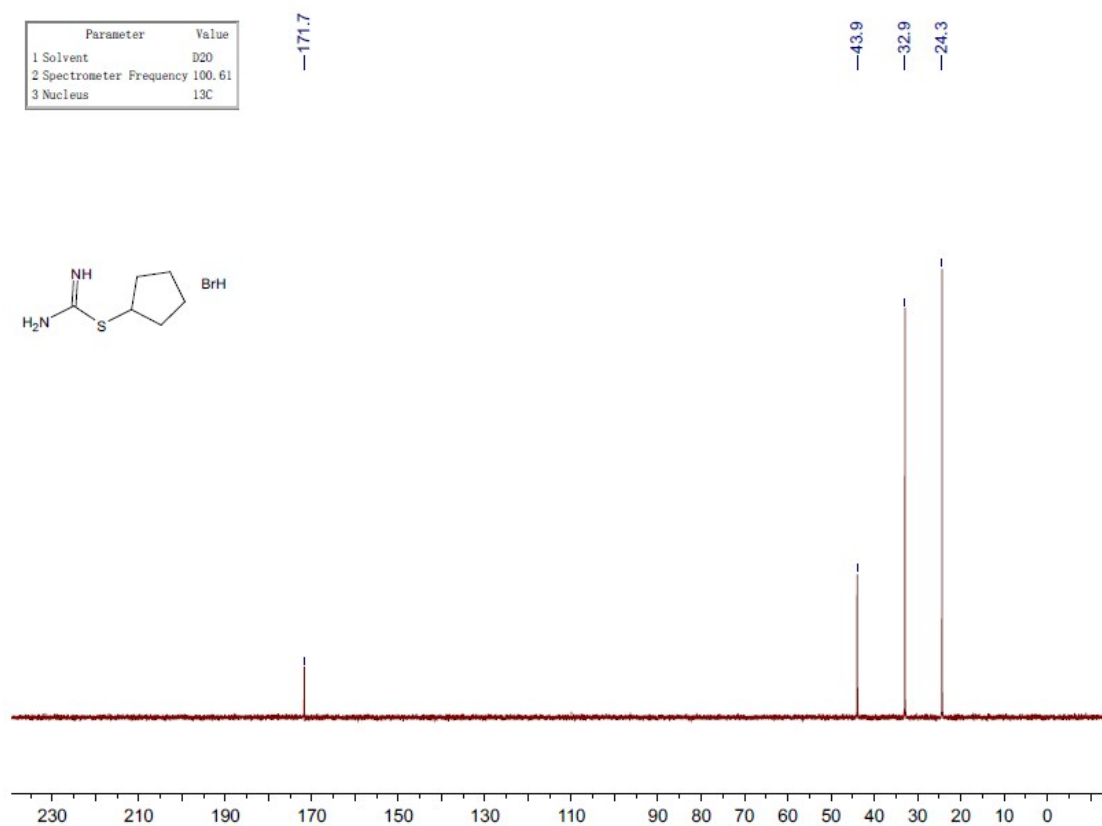

$^1\text{H}$  NMR (400 MHz,  $\text{D}_2\text{O}$ ) of **3c**

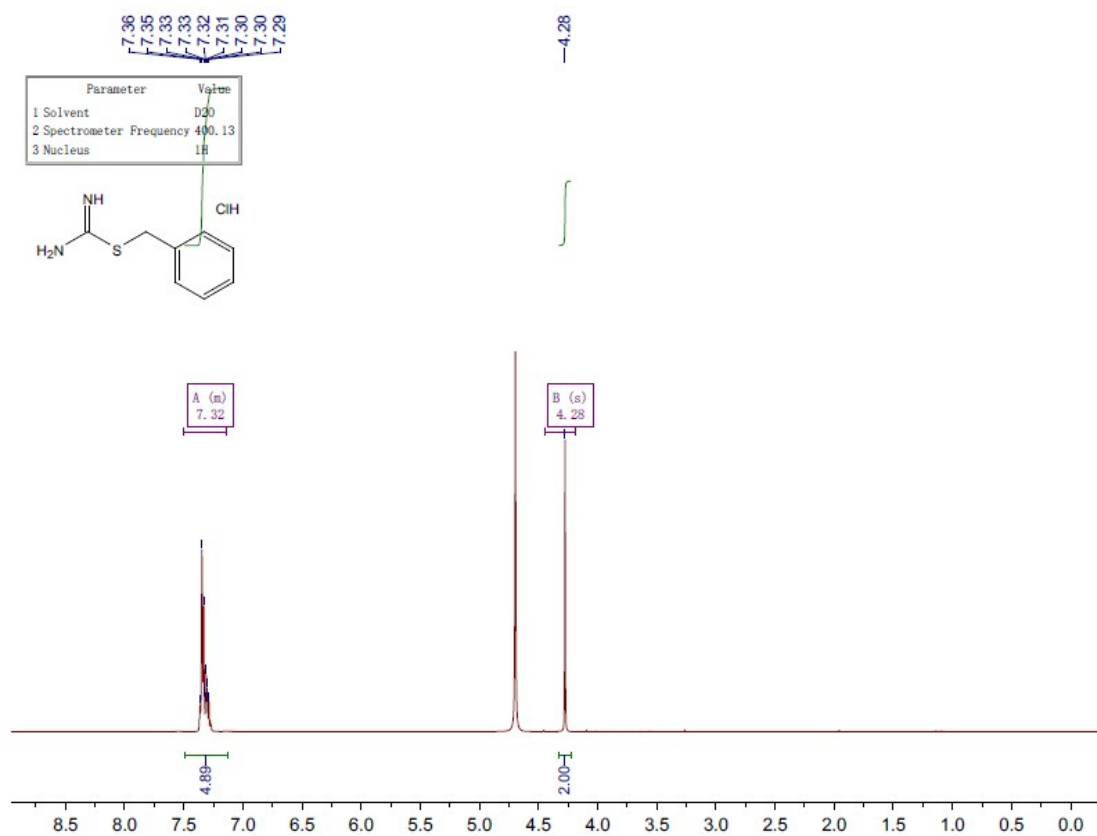

$^{13}\text{C}$  NMR (101 MHz,  $\text{D}_2\text{O}$ ) of **3c**

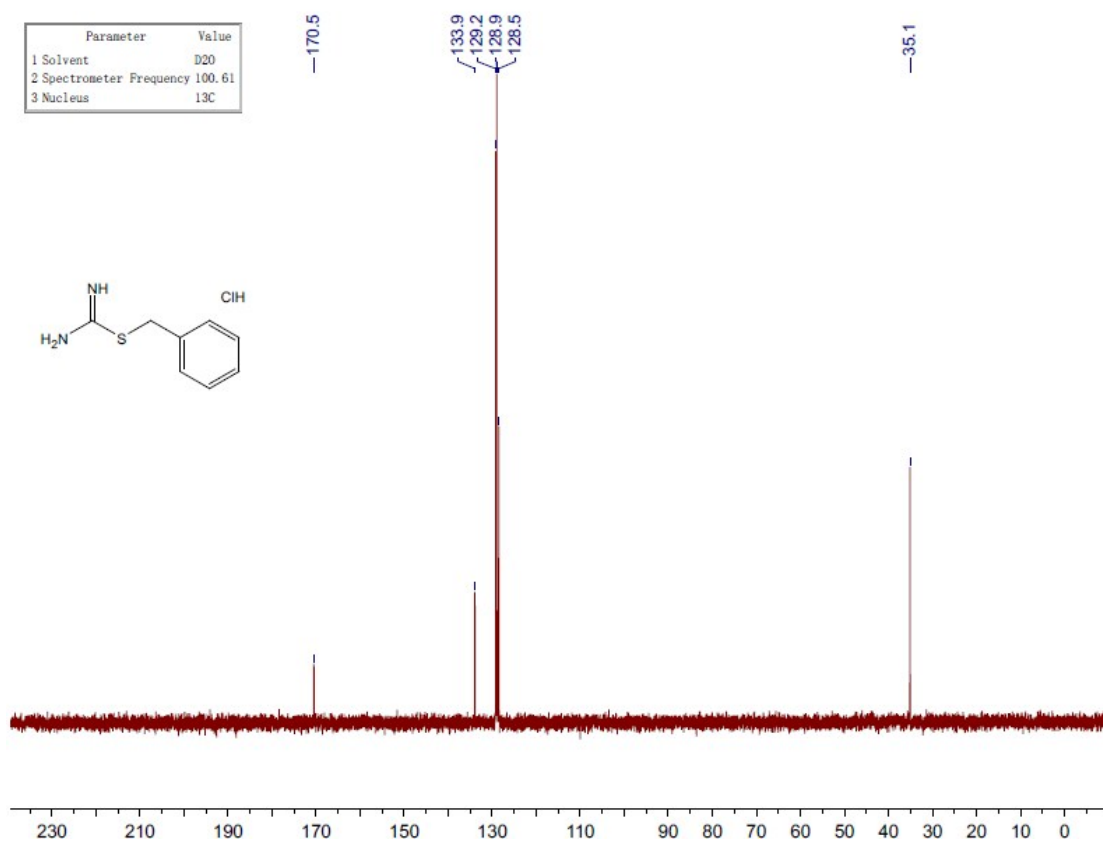

<sup>1</sup>H NMR (400 MHz, D<sub>2</sub>O) of **3d**

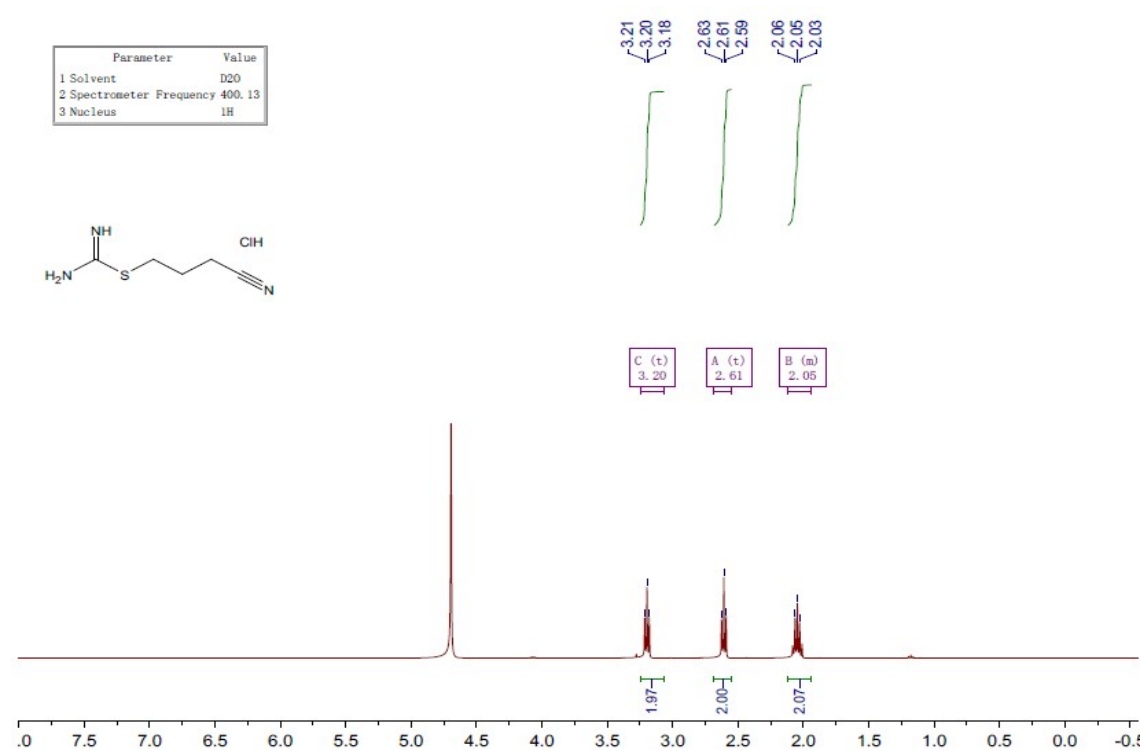

<sup>13</sup>C NMR (101 MHz, D<sub>2</sub>O) of **3d**

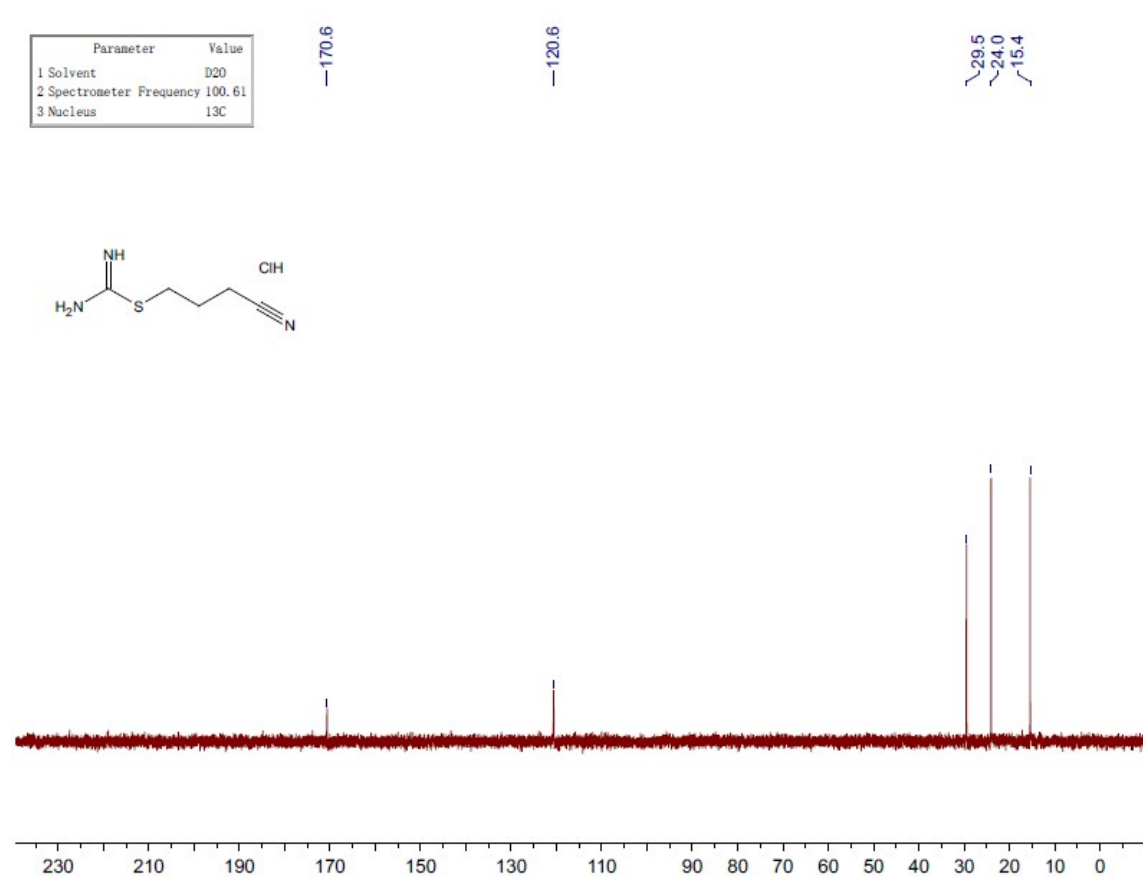



<sup>1</sup>H NMR (400 MHz, D<sub>2</sub>O) of **3e**

| Parameter                | Value          |
|--------------------------|----------------|
| 1 Solvent                | D2O            |
| 2 Spectrometer Frequency | 400.13         |
| 3 Nucleus                | <sup>1</sup> H |

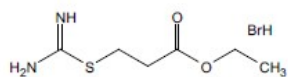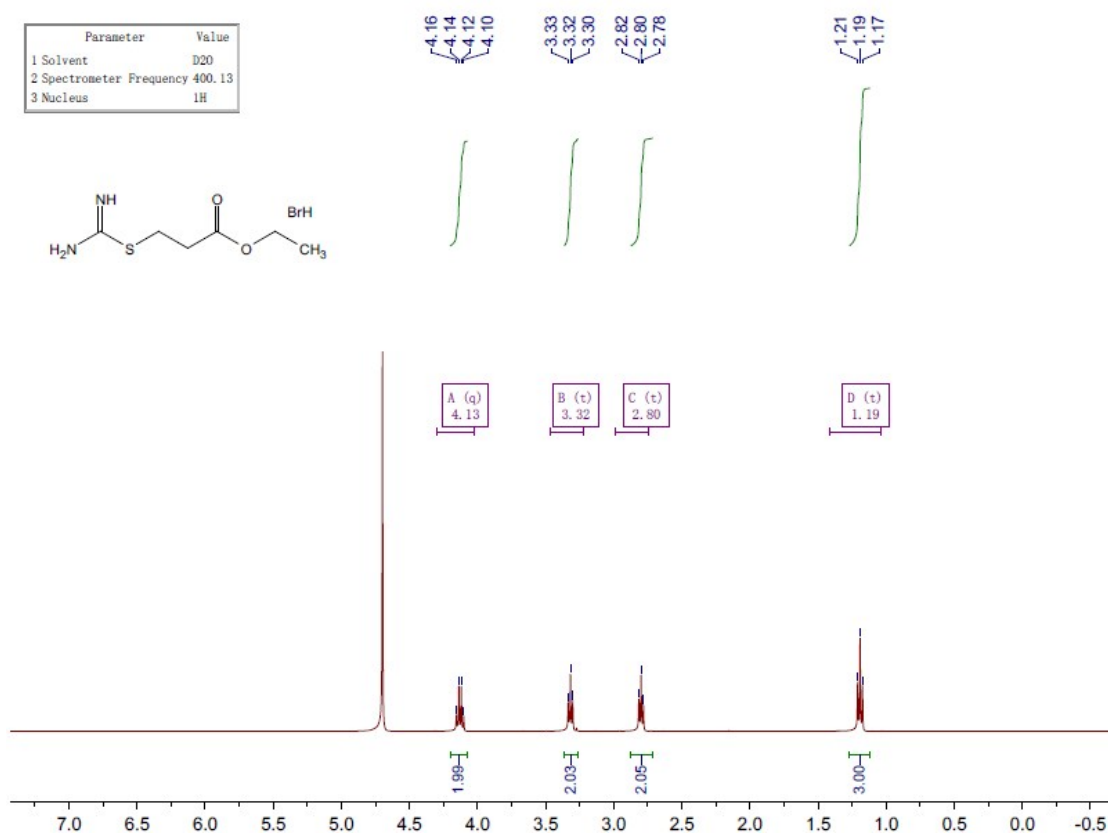

<sup>13</sup>C NMR (101 MHz, D<sub>2</sub>O) of **3e**

| Parameter                | Value           |
|--------------------------|-----------------|
| 1 Solvent                | D2O             |
| 2 Spectrometer Frequency | 100.61          |
| 3 Nucleus                | <sup>13</sup> C |

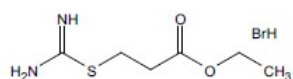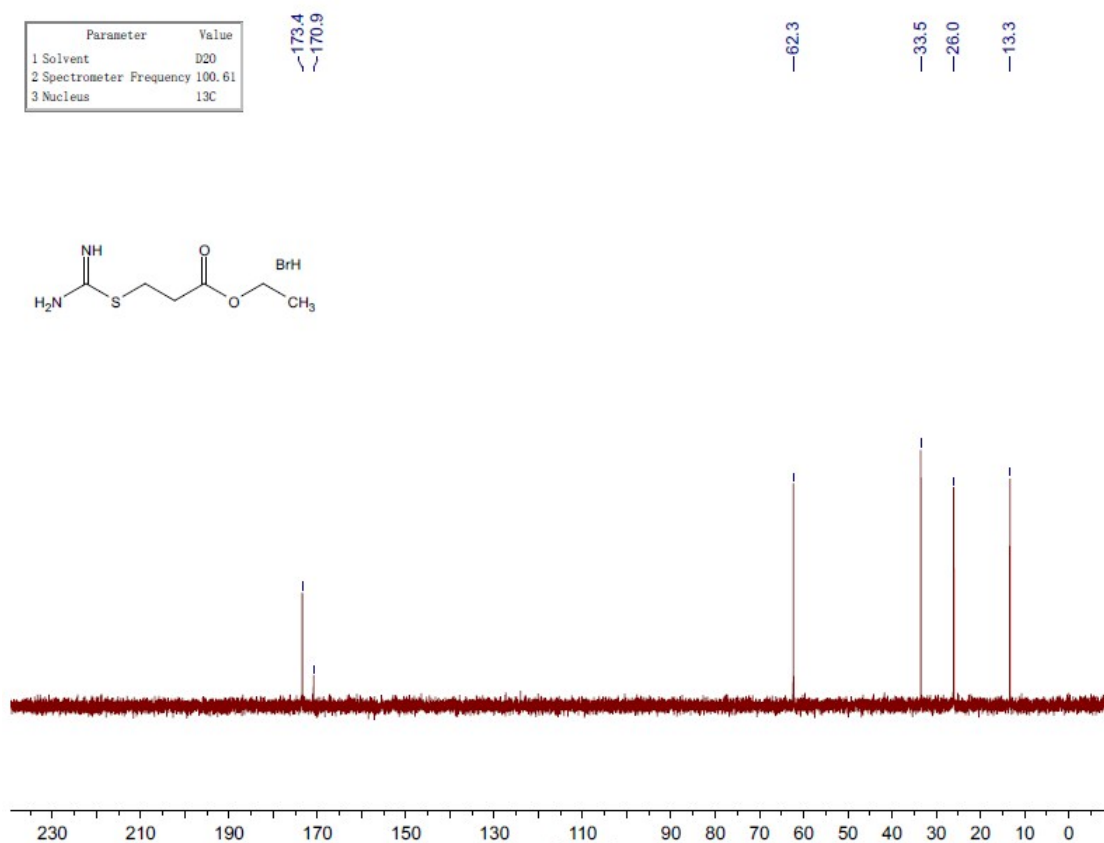

<sup>1</sup>H NMR (400 MHz, D<sub>2</sub>O) of **3f**

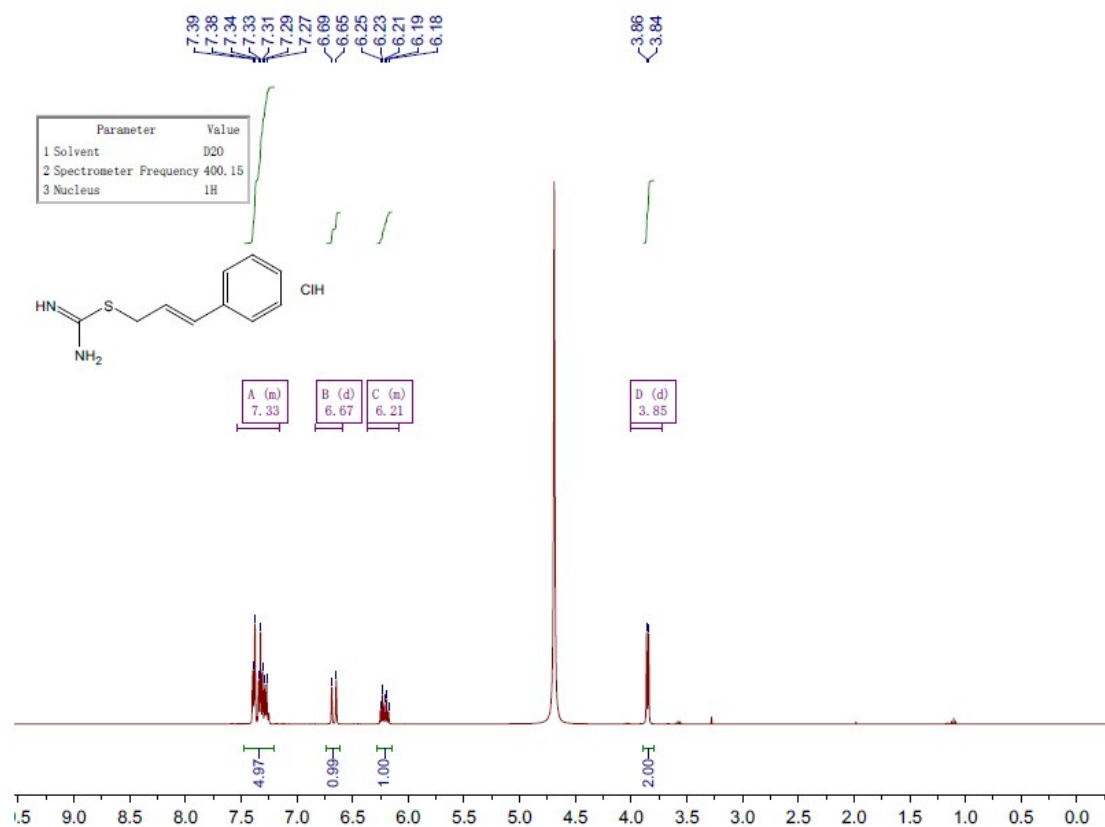

<sup>13</sup>C NMR (101 MHz, D<sub>2</sub>O) of **3f**

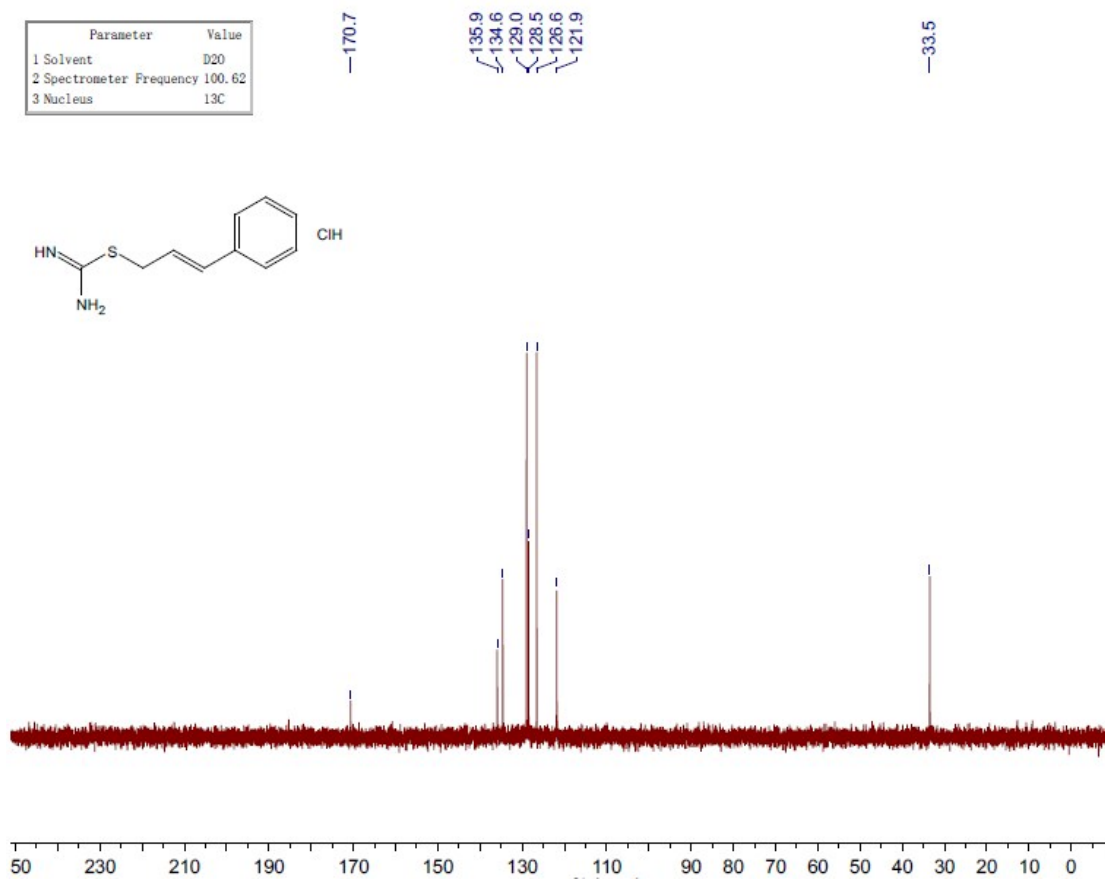

$^1\text{H}$  NMR (400 MHz,  $\text{D}_2\text{O}$ ) of **3g**

| Parameter                | Value                |
|--------------------------|----------------------|
| 1 Solvent                | $\text{D}_2\text{O}$ |
| 2 Spectrometer Frequency | 400.15               |
| 3 Nucleus                | $^1\text{H}$         |

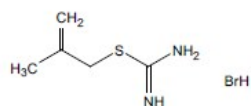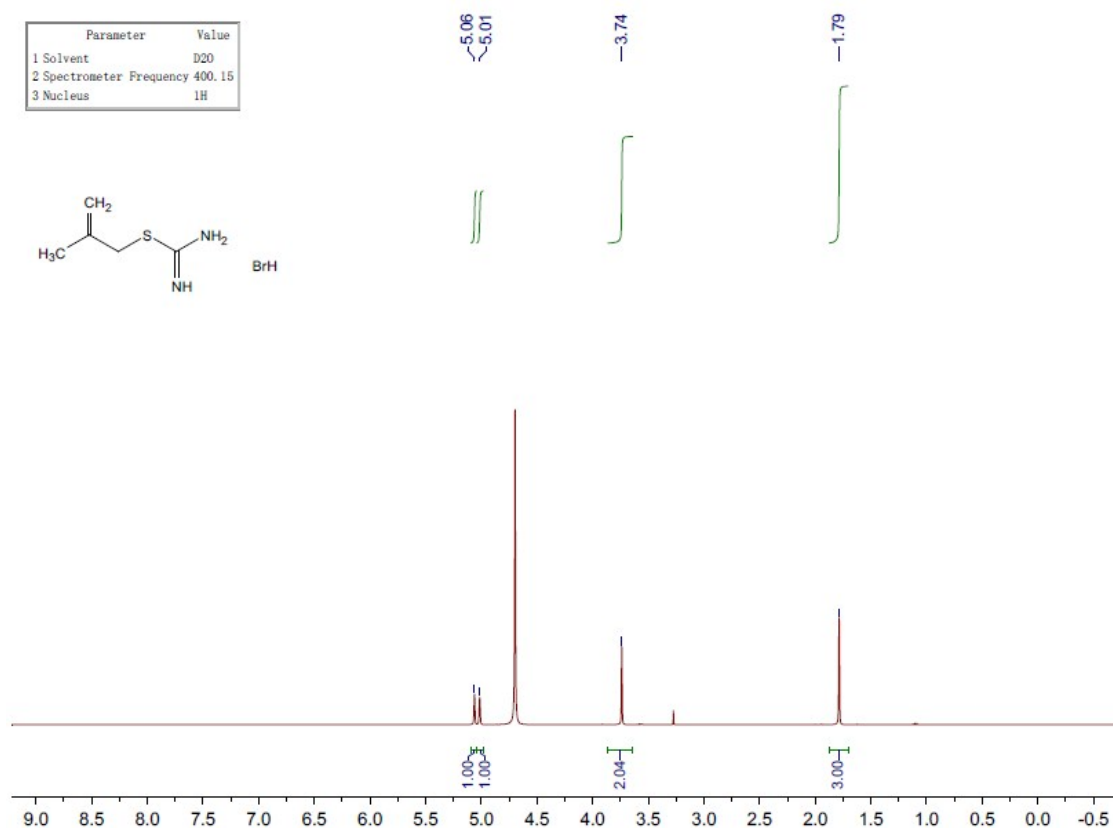

$^{13}\text{C}$  NMR (101 MHz,  $\text{D}_2\text{O}$ ) of **3g**

| Parameter                | Value                |
|--------------------------|----------------------|
| 1 Solvent                | $\text{D}_2\text{O}$ |
| 2 Spectrometer Frequency | 100.62               |
| 3 Nucleus                | $^{13}\text{C}$      |

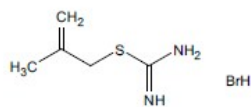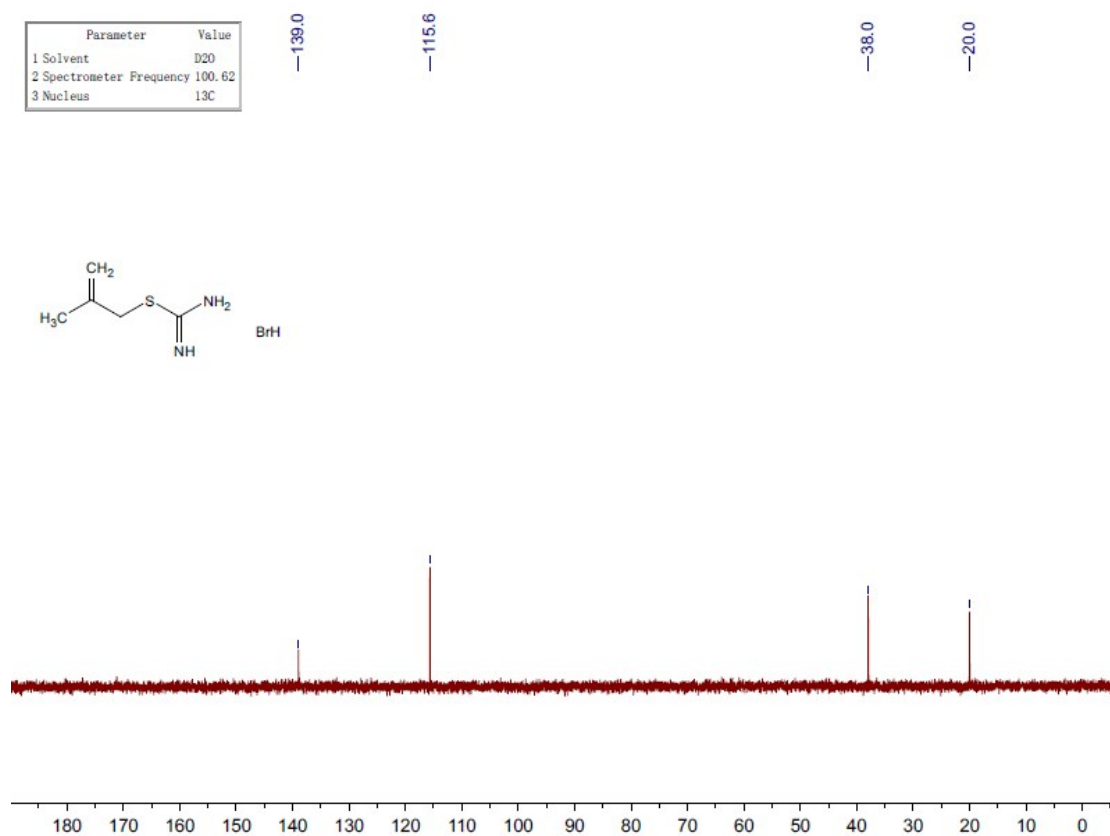

<sup>1</sup>H NMR (400 MHz, CDCl<sub>3</sub>) of 7c

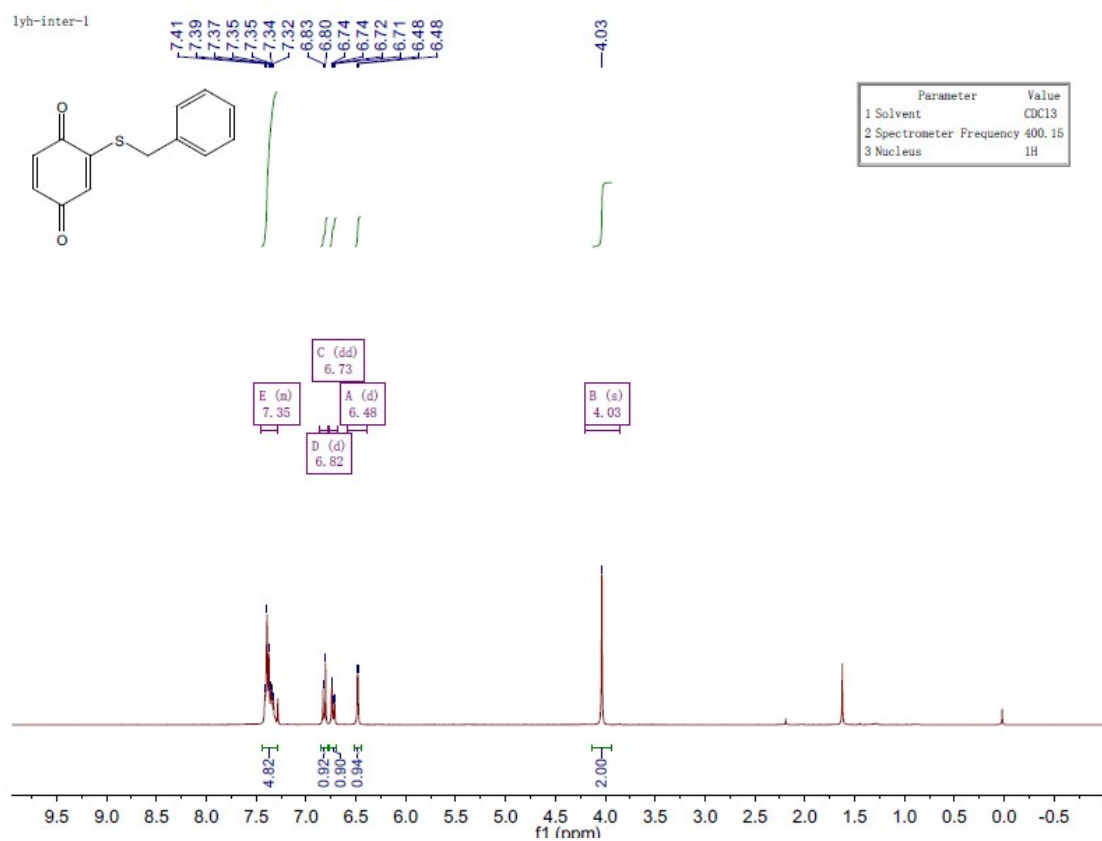

<sup>13</sup>C NMR (101 MHz, CDCl<sub>3</sub>) of 7c

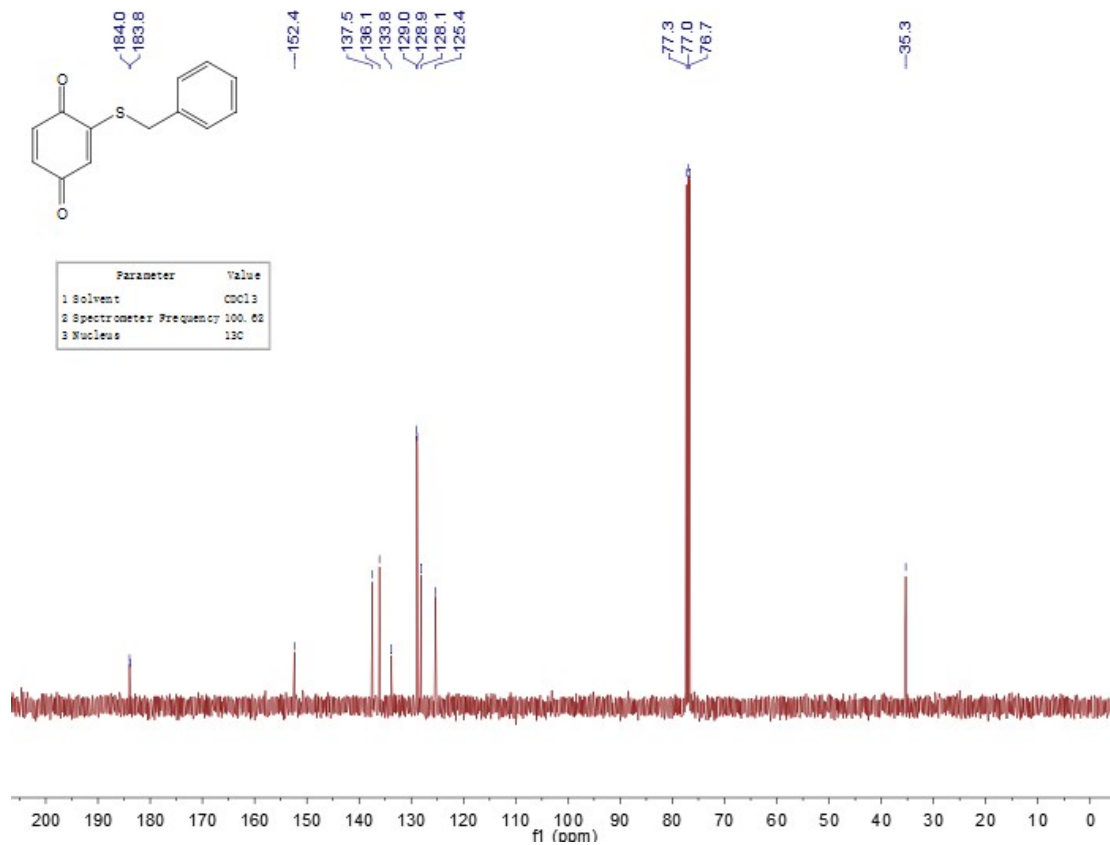

<sup>1</sup>H NMR (400 MHz, CDCl<sub>3</sub>) of **4aa**

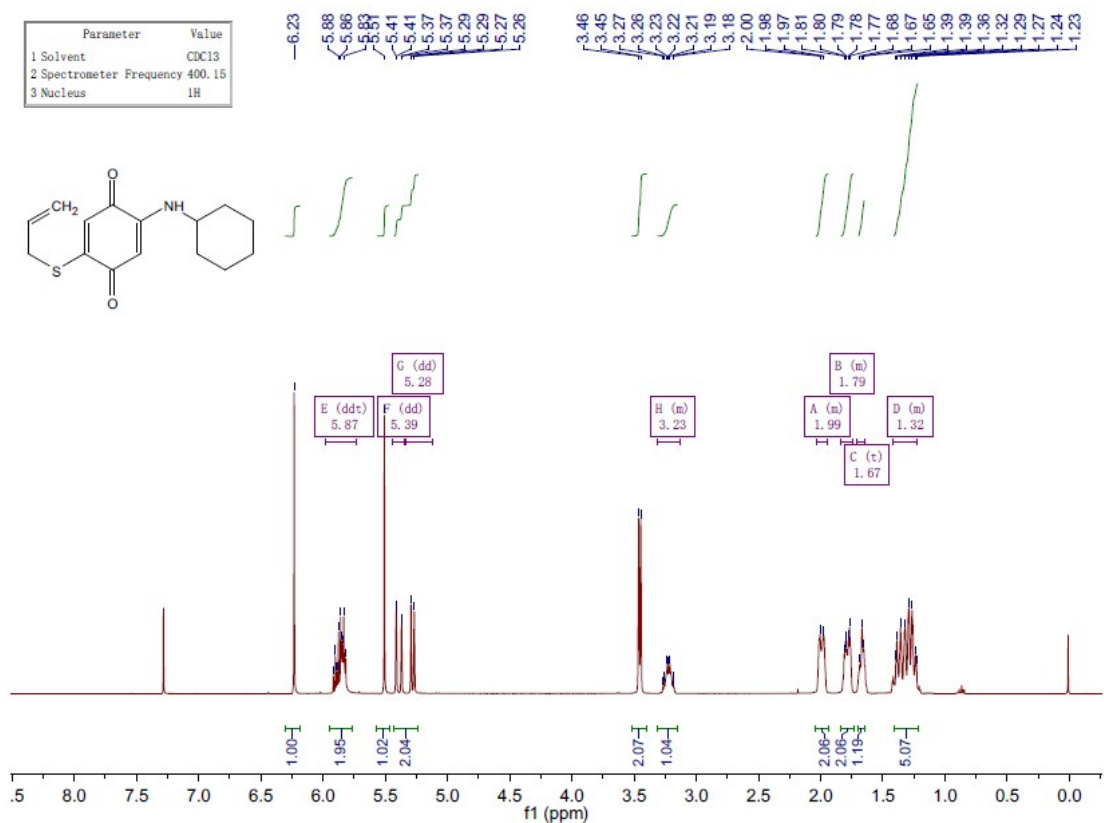

<sup>13</sup>C NMR (101 MHz, CDCl<sub>3</sub>) of **4aa**

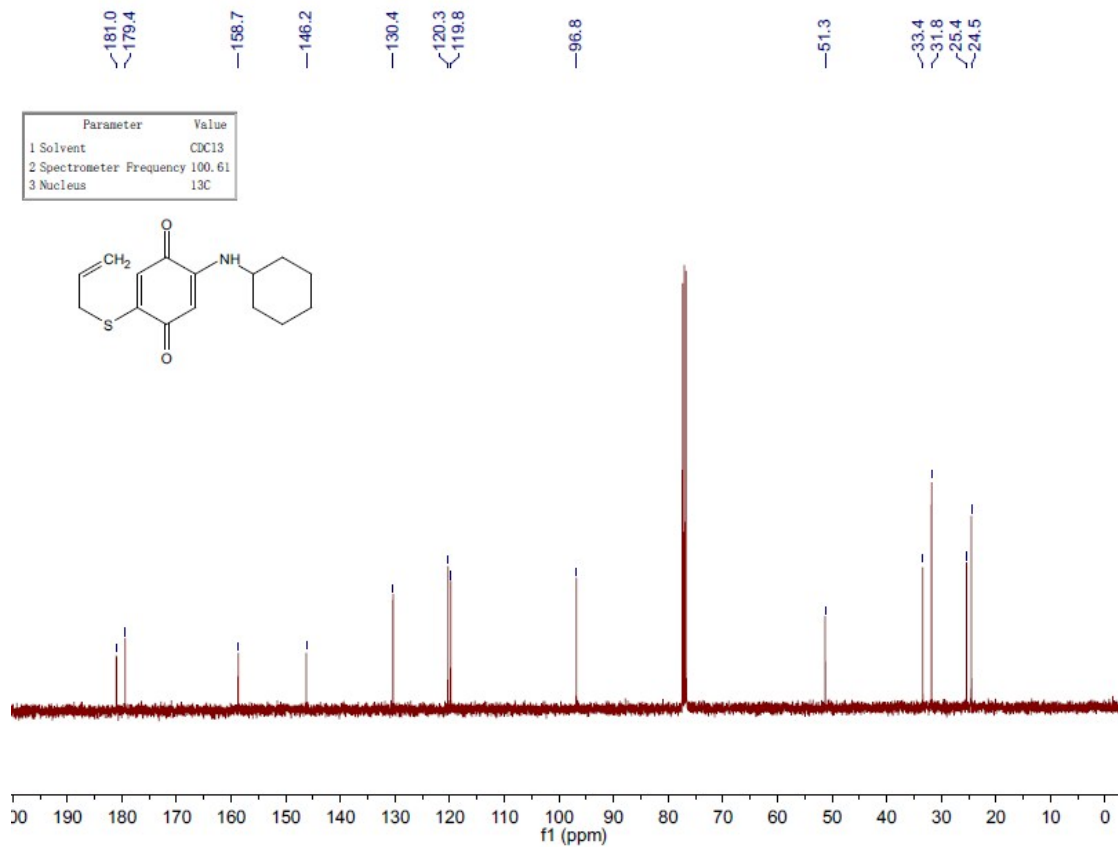

### DEPT 135 of 4aa

| Parameter                | Value  |
|--------------------------|--------|
| 1 Solvent                | CDC13  |
| 2 Spectrometer Frequency | 100.62 |
| 3 Nucleus                | 13C    |

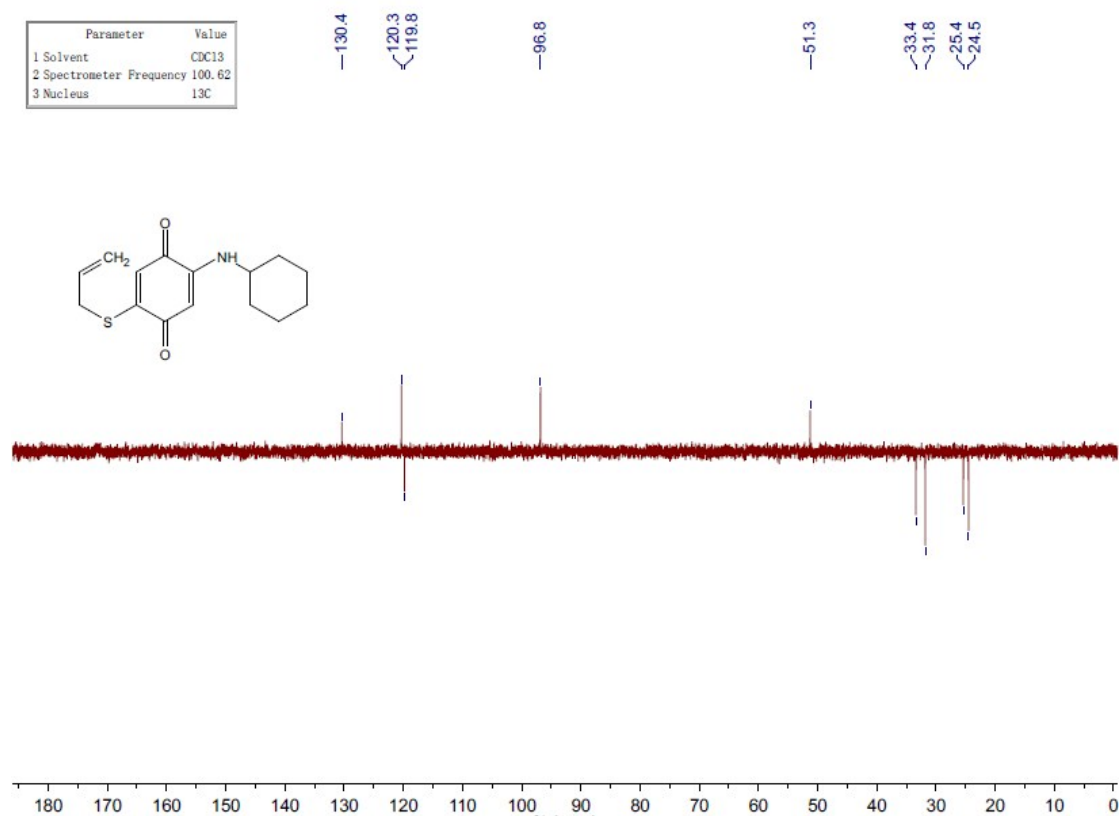

### HMBC of 4aa

| Parameter                | Value (f2, f1)    |
|--------------------------|-------------------|
| 1 Solvent                | CDC13             |
| 2 Spectrometer Frequency | (400.15, 100.62)  |
| 3 Spectral Width         | (3597.1, 22348.9) |
| 4 Lowest Frequency       | (-248.6, -1129.2) |
| 5 Nucleus                | (1H, 13C)         |
| 6 Acquired Size          | (2048, 128)       |
| 7 Spectral Size          | (2048, 512)       |

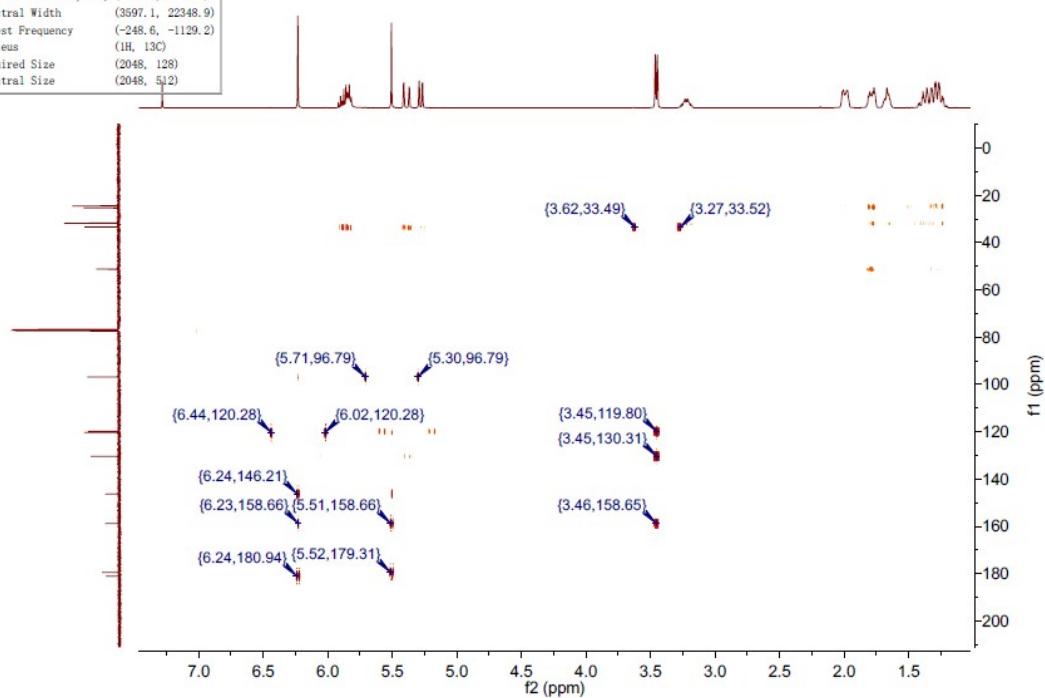

<sup>1</sup>H NMR (400 MHz, CDCl<sub>3</sub>) of **4ab**

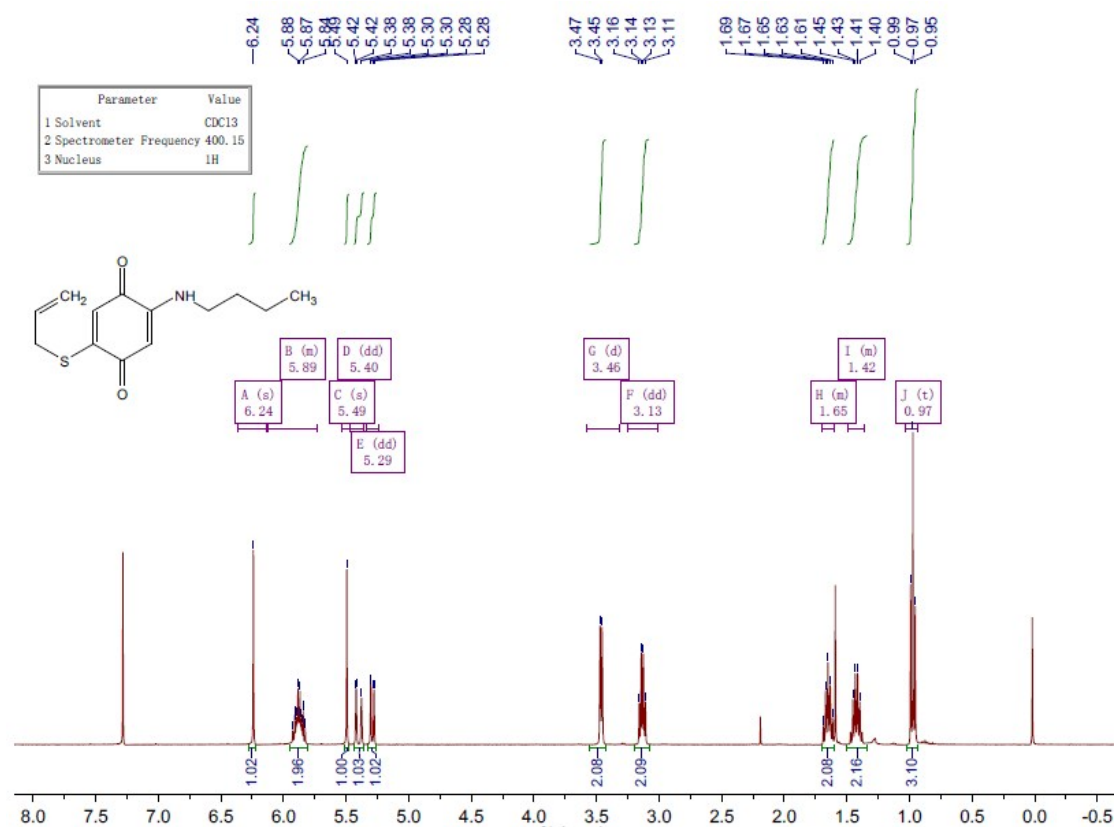

<sup>13</sup>C NMR (101 MHz, CDCl<sub>3</sub>) of **4ab**

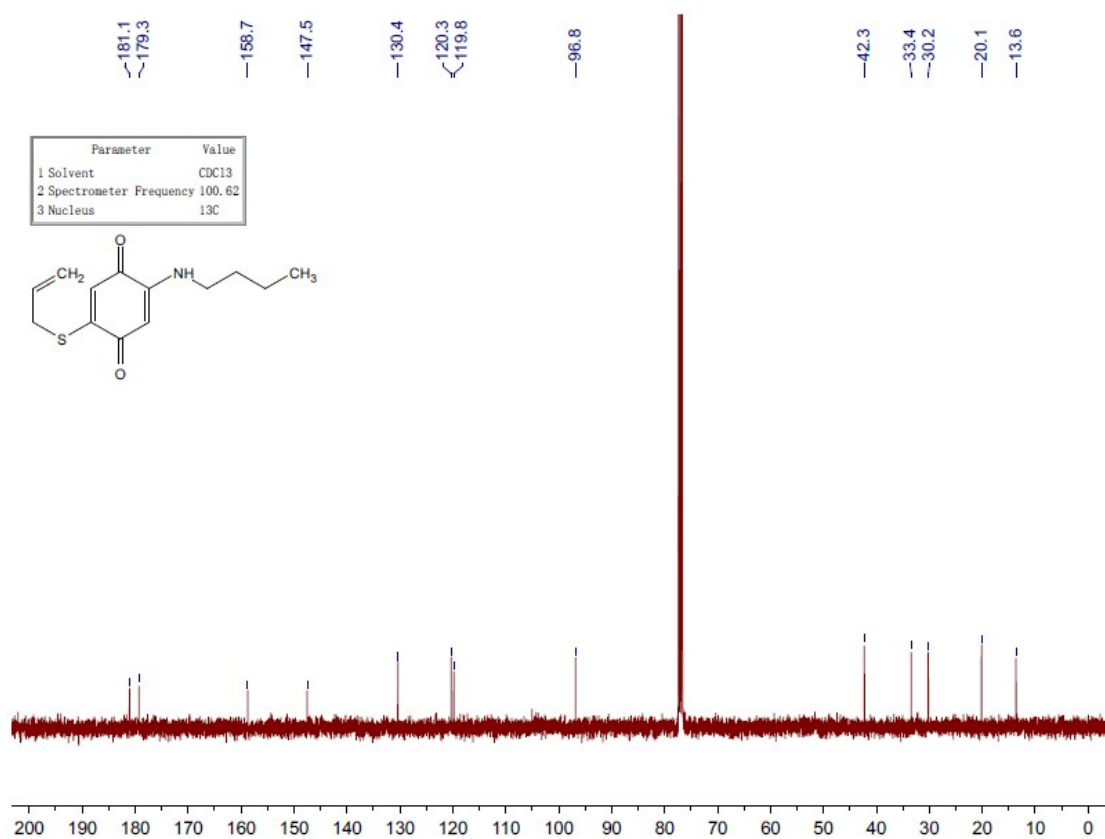

<sup>1</sup>H NMR (400 MHz, CDCl<sub>3</sub>) of **4ac**

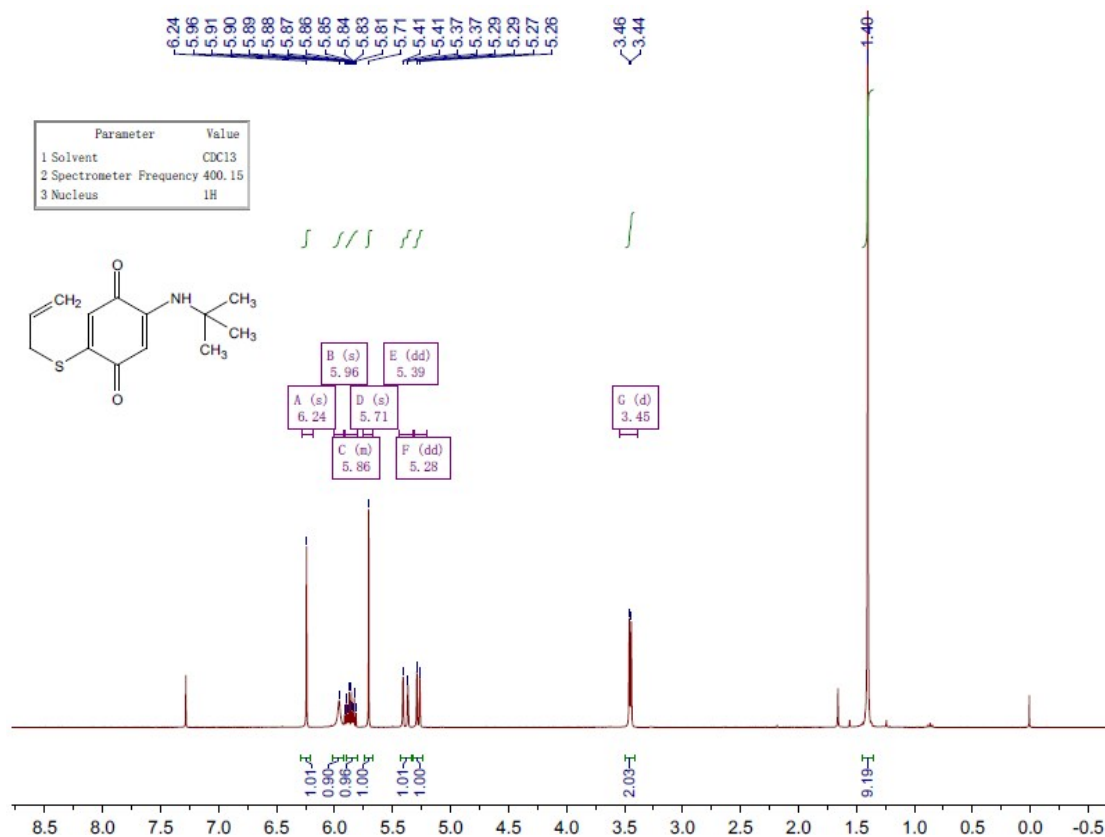

<sup>13</sup>C NMR (101 MHz, CDCl<sub>3</sub>) of **4ac**

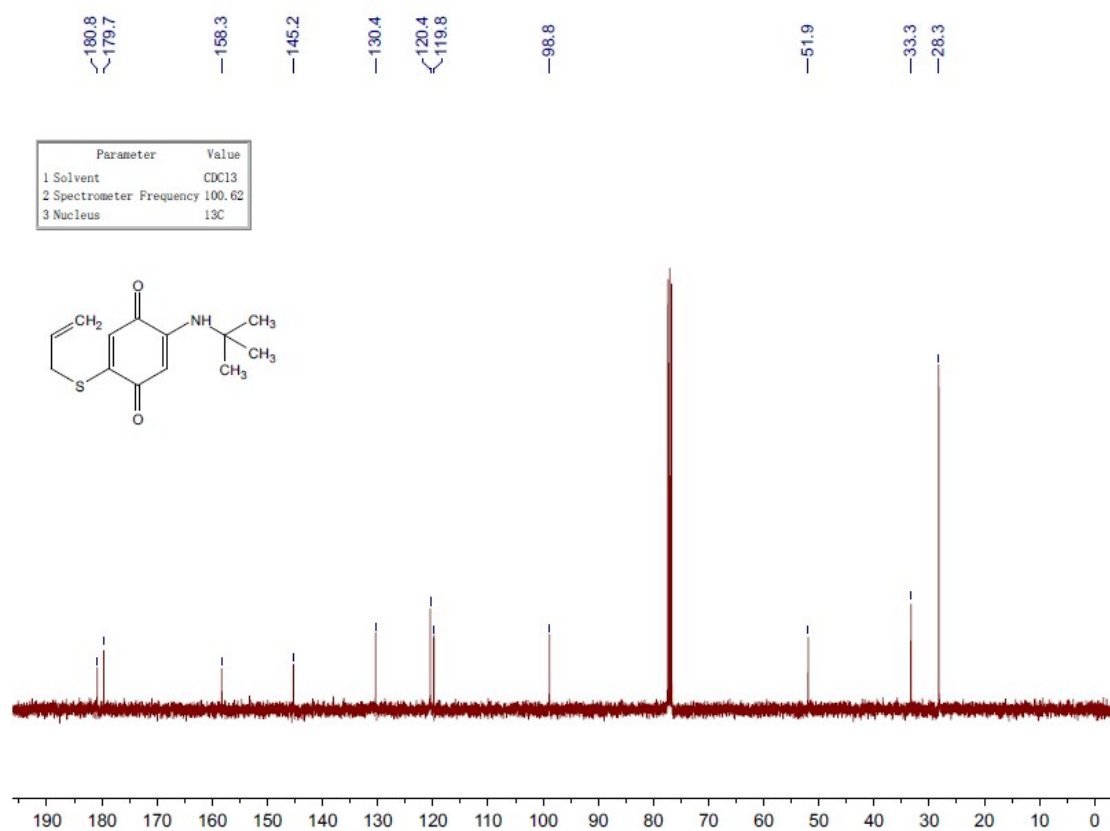



<sup>1</sup>H NMR (400 MHz, CDCl<sub>3</sub>) of **4ad**

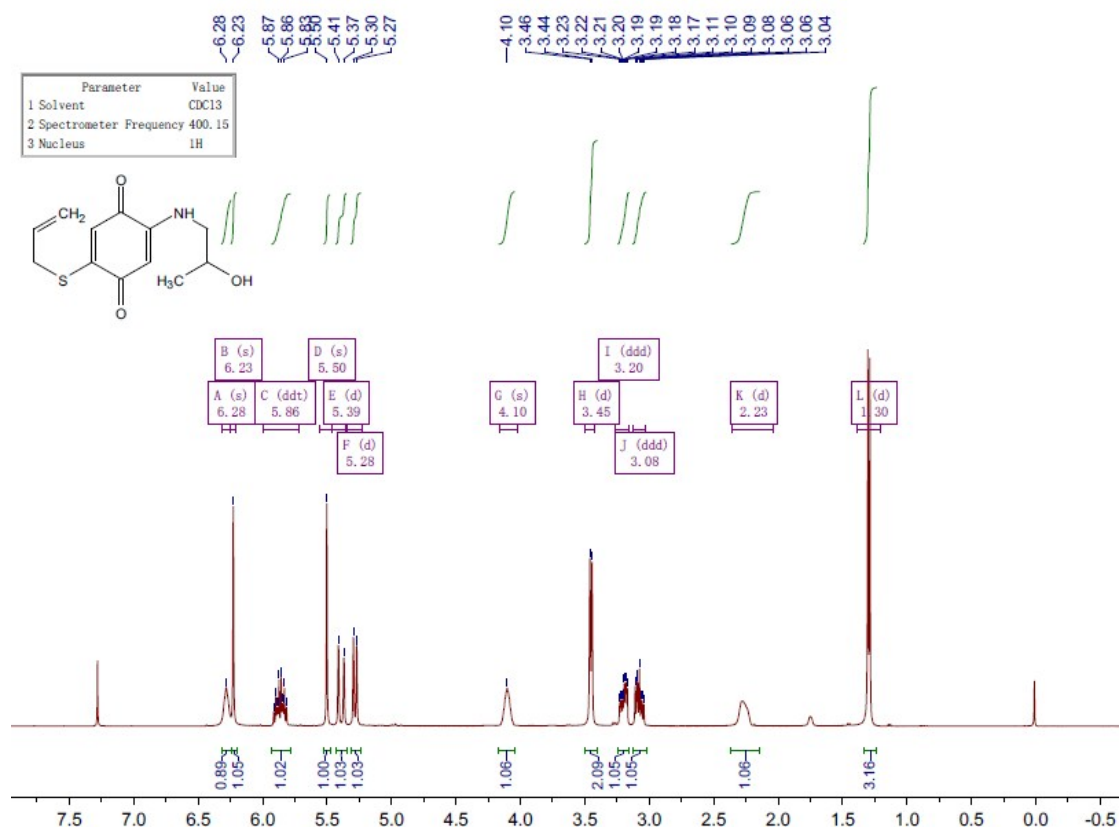

<sup>13</sup>C NMR (101 MHz, CDCl<sub>3</sub>) of **4ad**

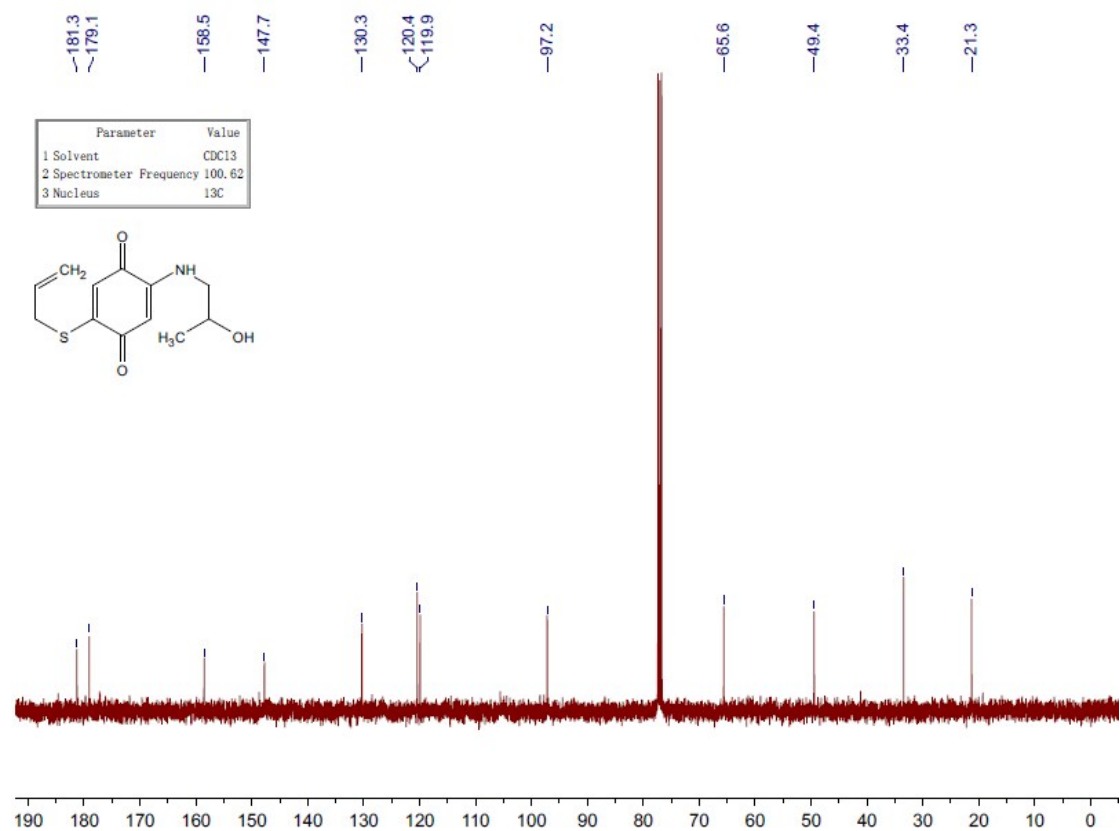

<sup>1</sup>H NMR (400 MHz, CDCl<sub>3</sub>) of **4ae**

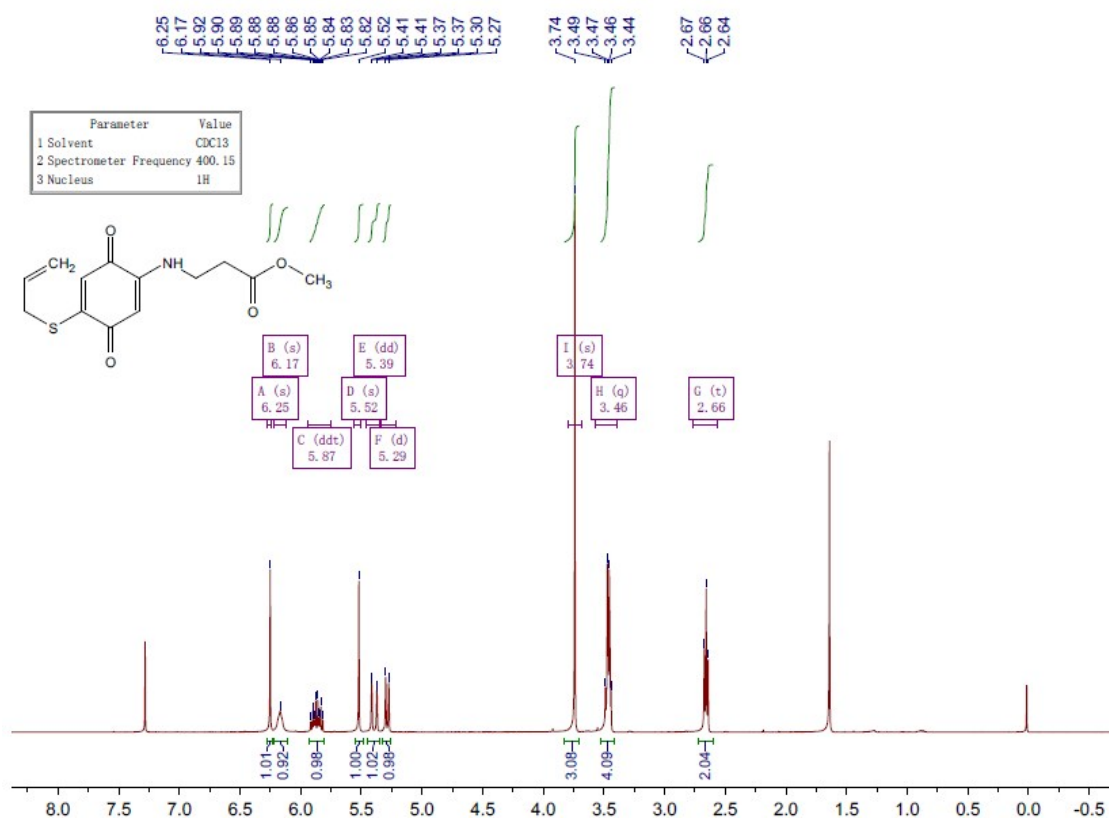

<sup>13</sup>C NMR (101 MHz, CDCl<sub>3</sub>) of **4ae**

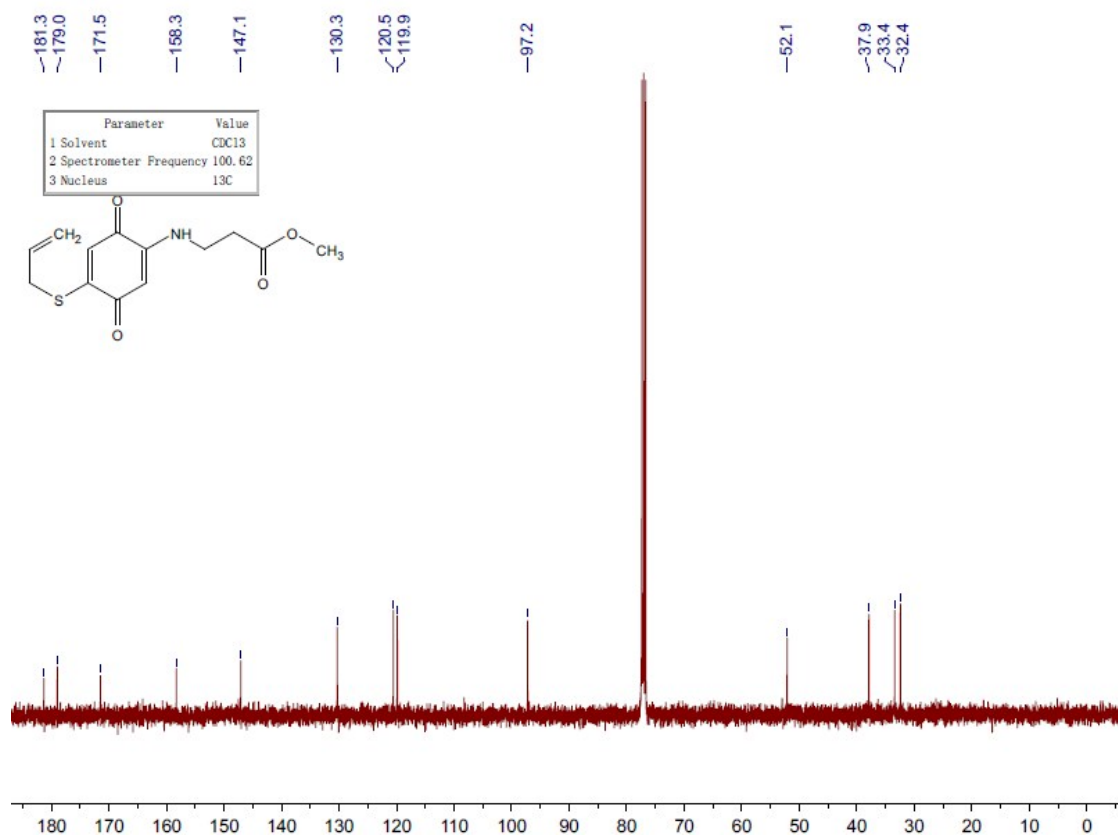

<sup>1</sup>H NMR (400 MHz, CDCl<sub>3</sub>) of **4af**

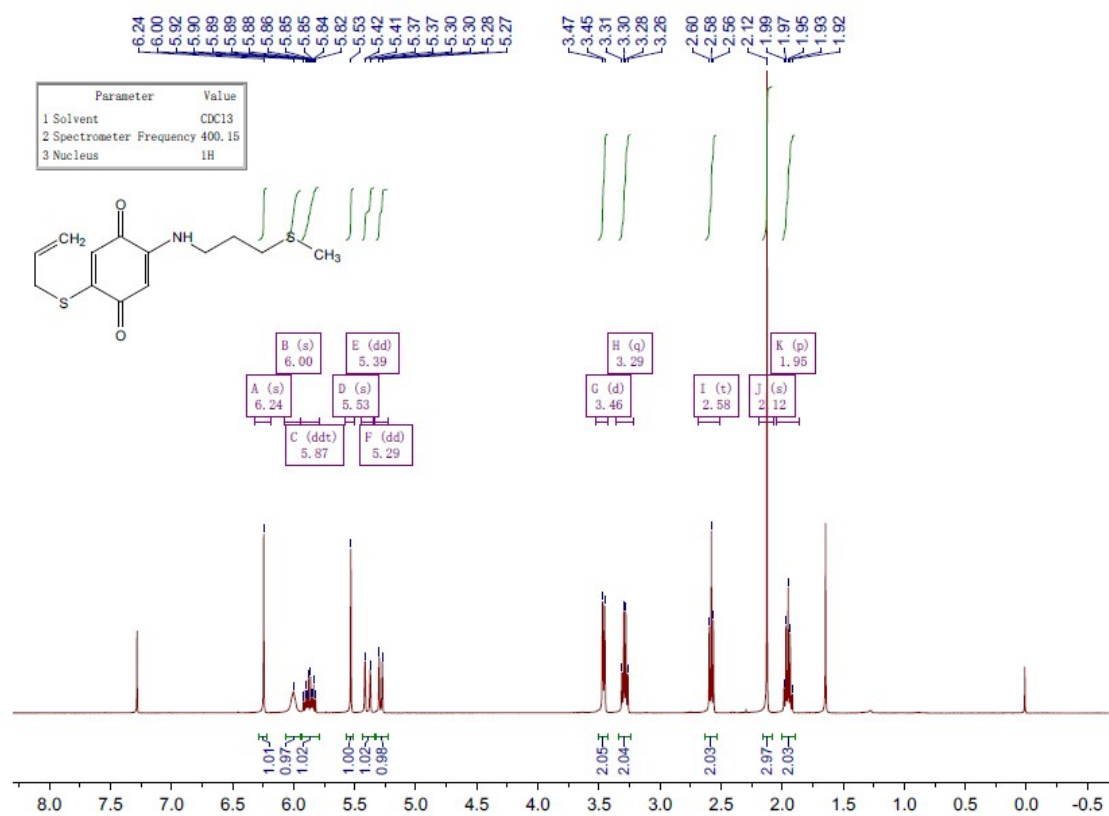

<sup>13</sup>C NMR (101 MHz, CDCl<sub>3</sub>) of **4af**

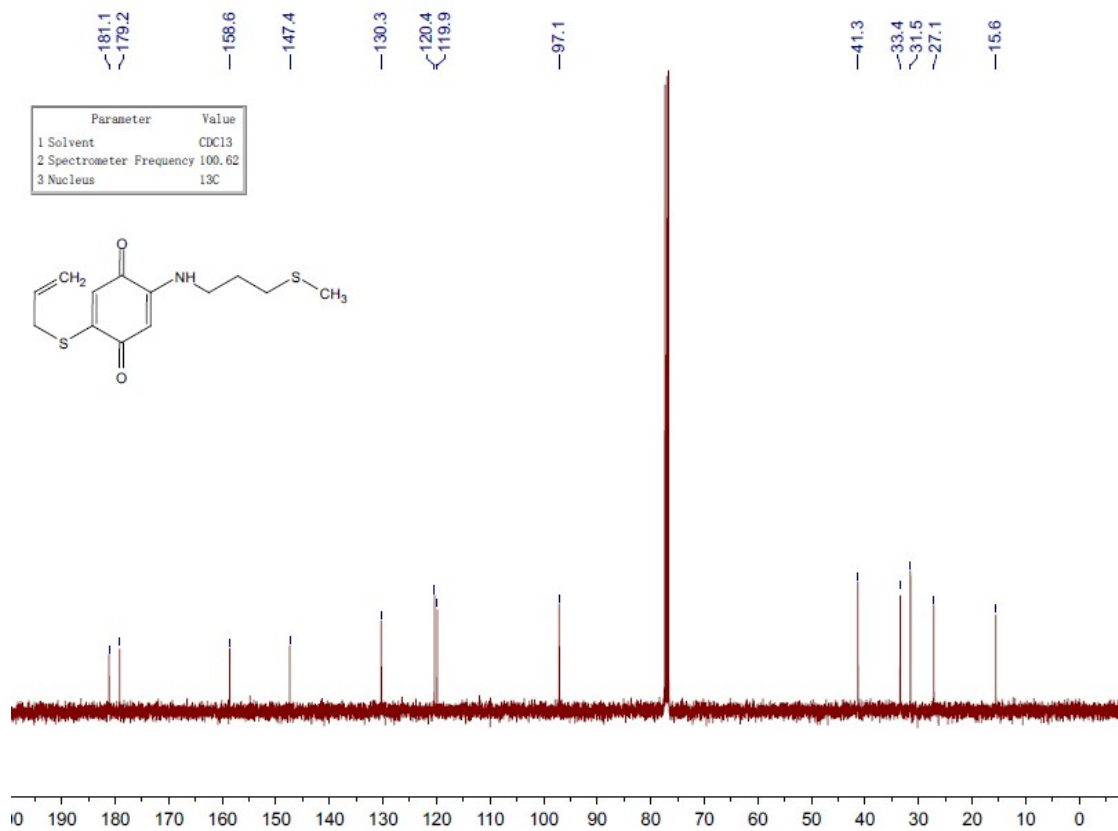

<sup>1</sup>H NMR (400 MHz, CDCl<sub>3</sub>) of **4ag**

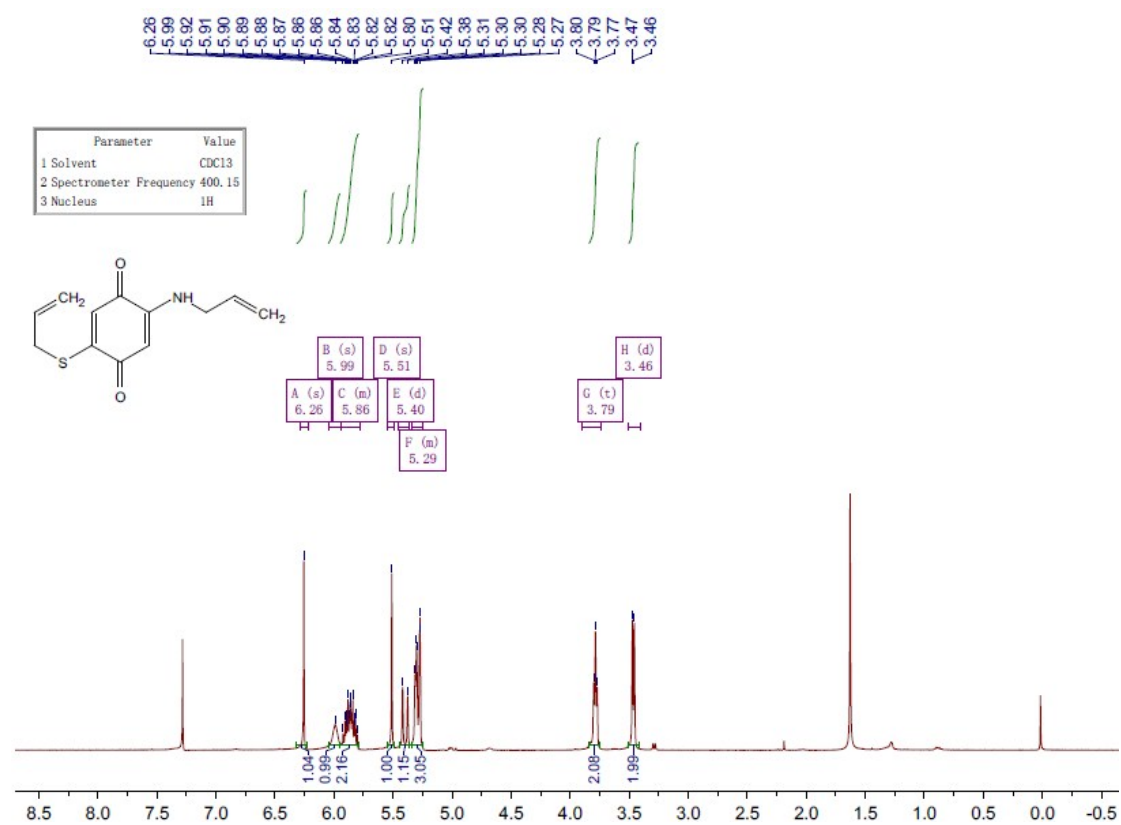

<sup>13</sup>C NMR (101 MHz, CDCl<sub>3</sub>) of **4ag**

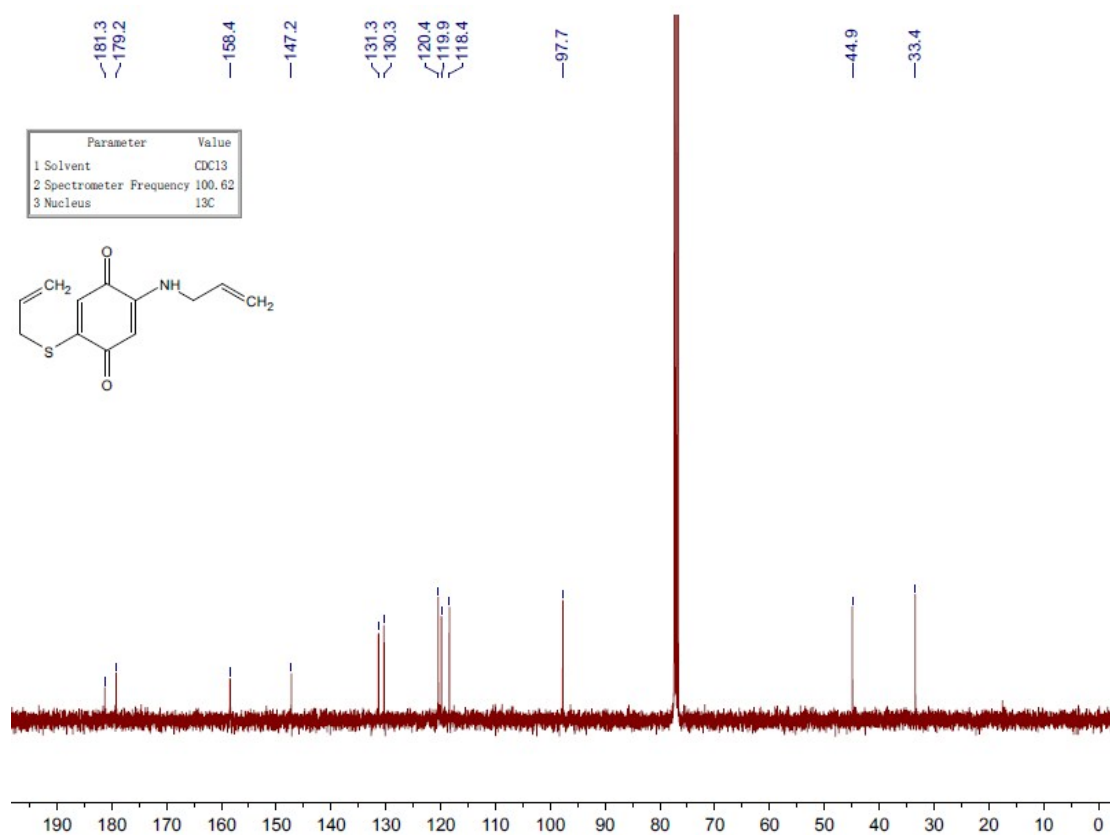

<sup>1</sup>H NMR (400 MHz, CDCl<sub>3</sub>) of **4ah**

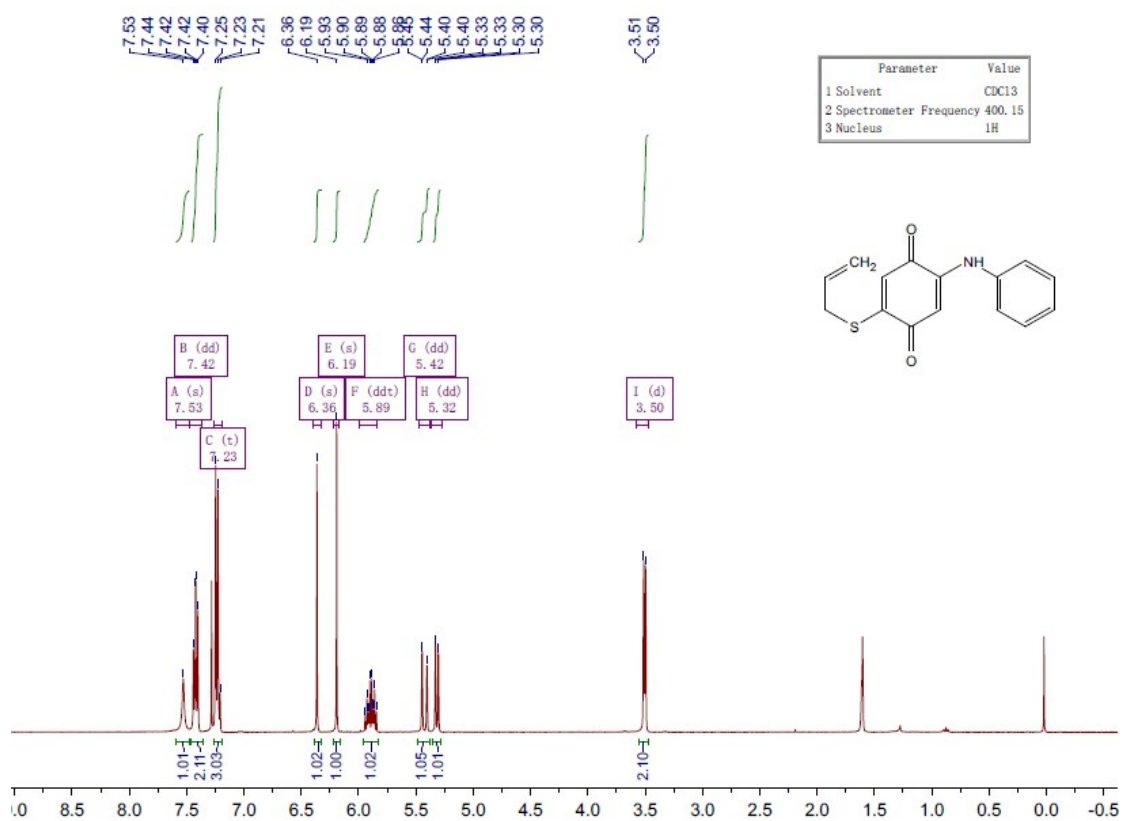

<sup>13</sup>C NMR (101 MHz, CDCl<sub>3</sub>) of **4ah**

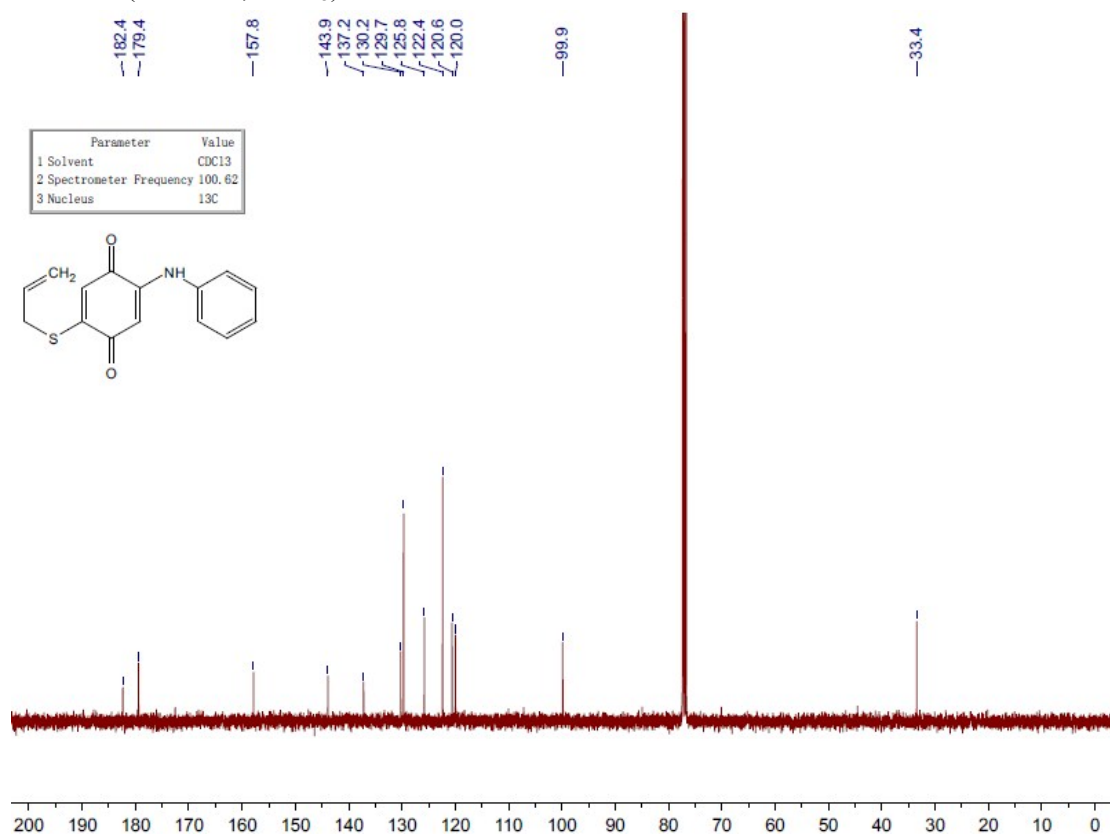

<sup>1</sup>H NMR (400 MHz, CDCl<sub>3</sub>) of **4ai**

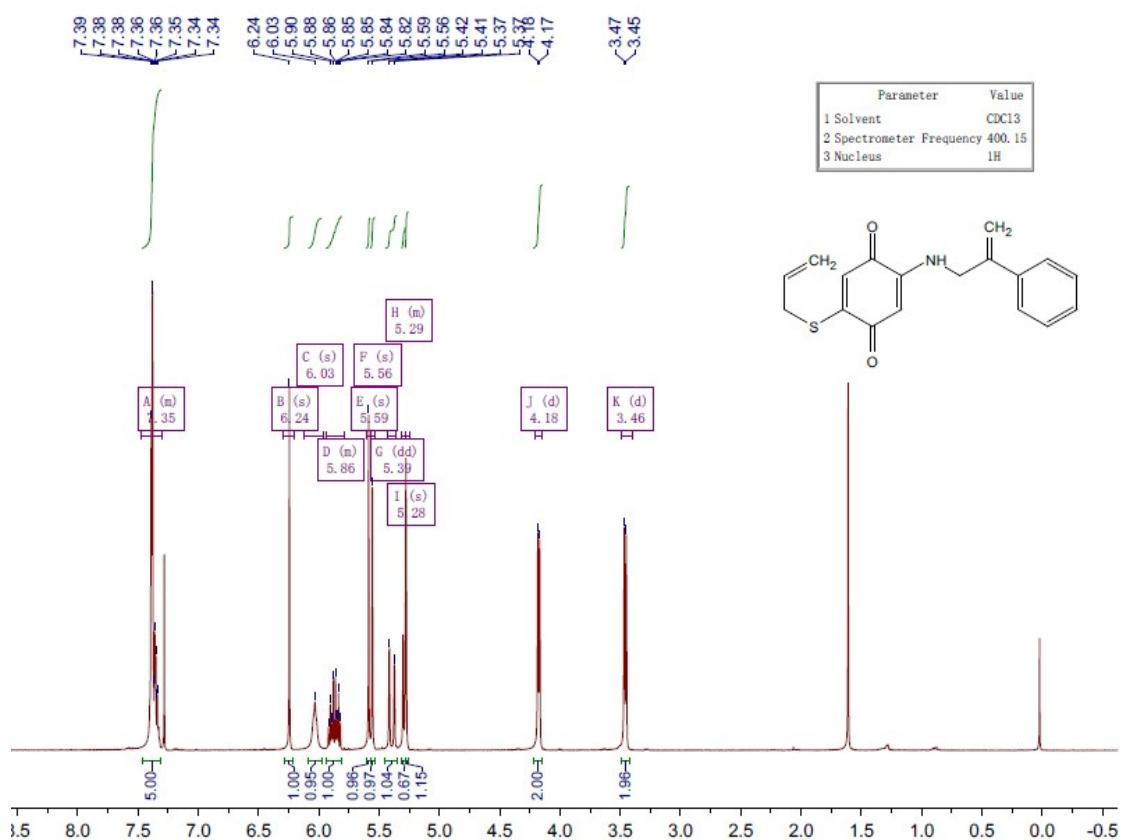

<sup>13</sup>C NMR (101 MHz, CDCl<sub>3</sub>) of **4ai**

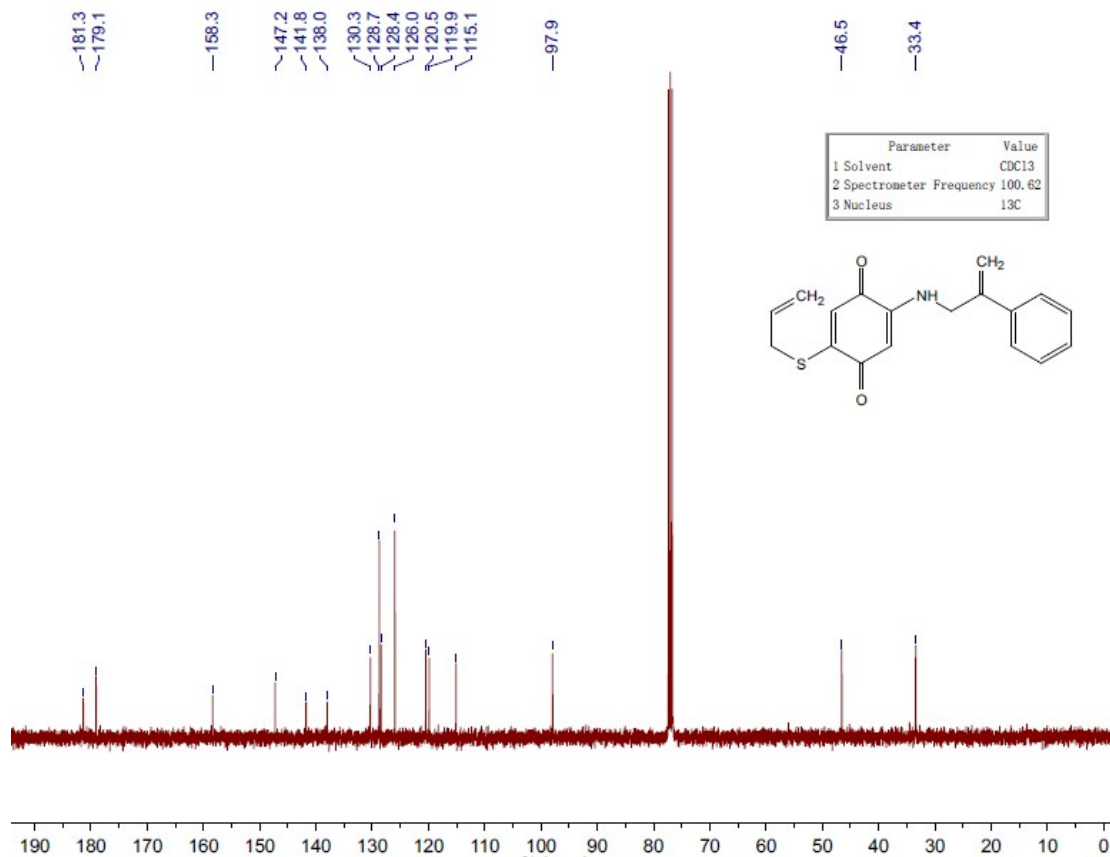

<sup>1</sup>H NMR (400 MHz, CDCl<sub>3</sub>) of **4aj**

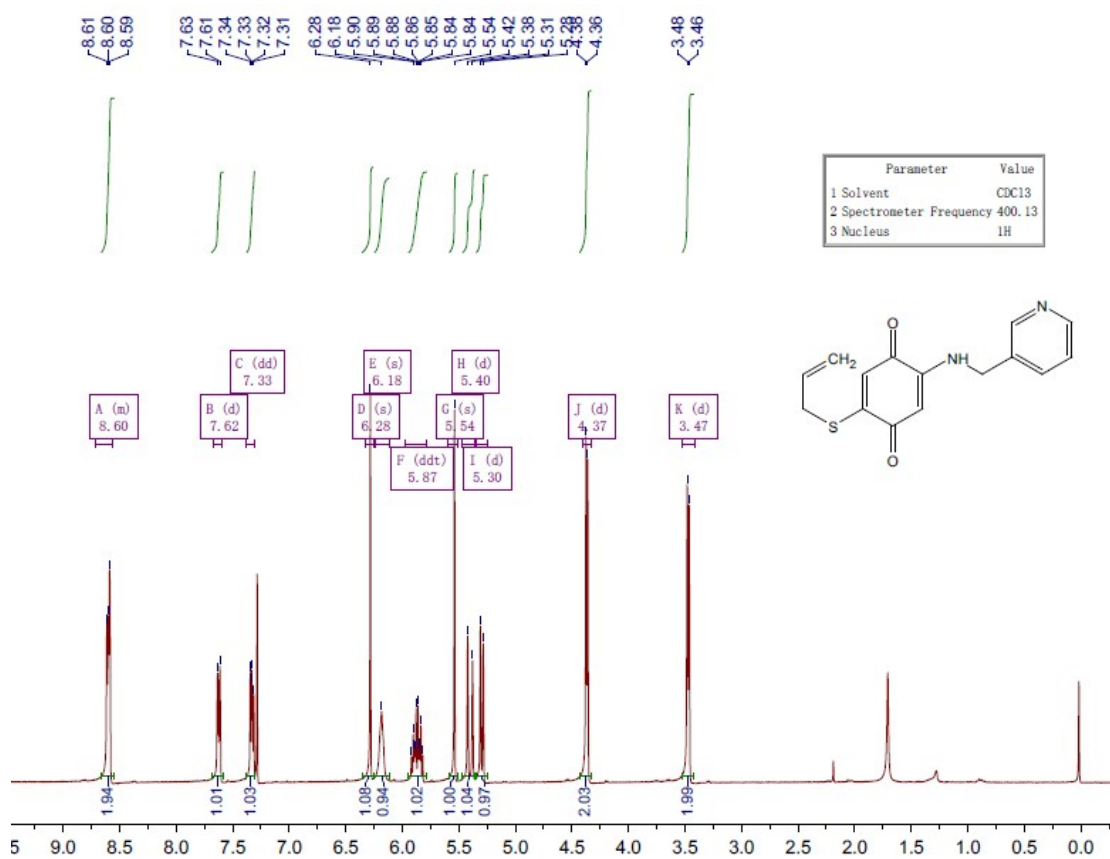

<sup>13</sup>C NMR (101 MHz, CDCl<sub>3</sub>) of **4aj**

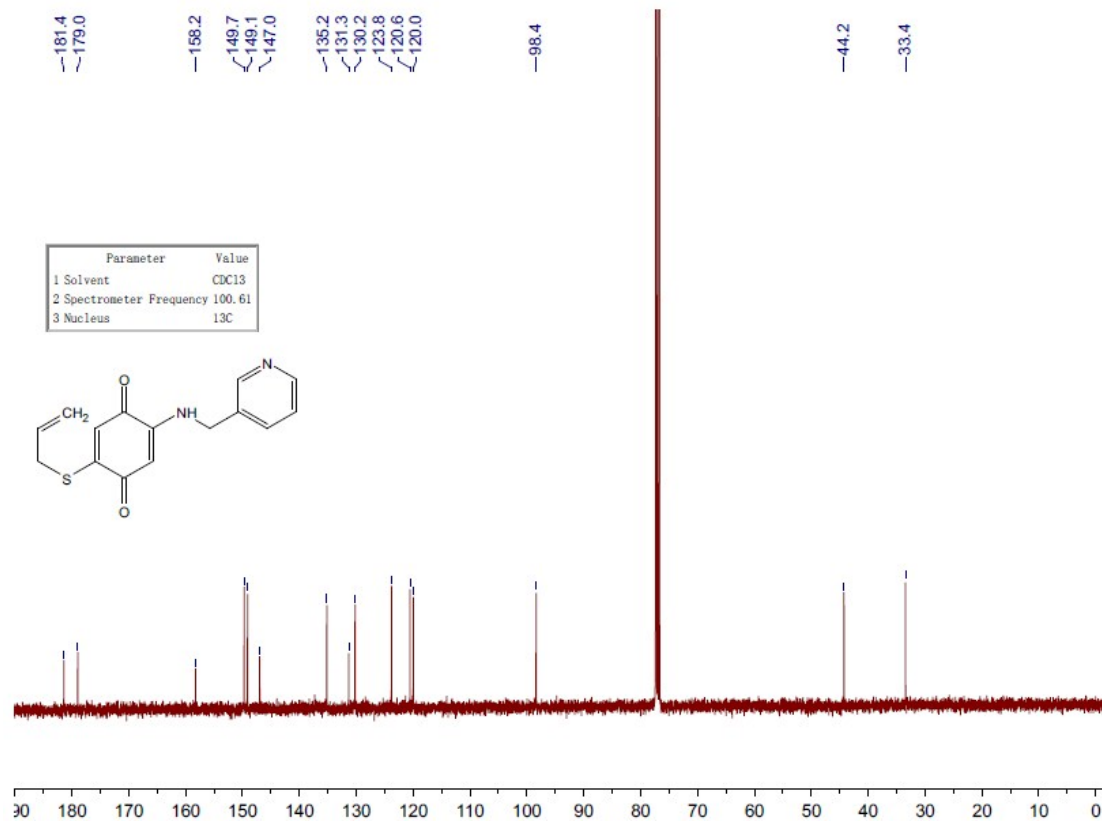

<sup>1</sup>H NMR (400 MHz, CDCl<sub>3</sub>) of **4ak**

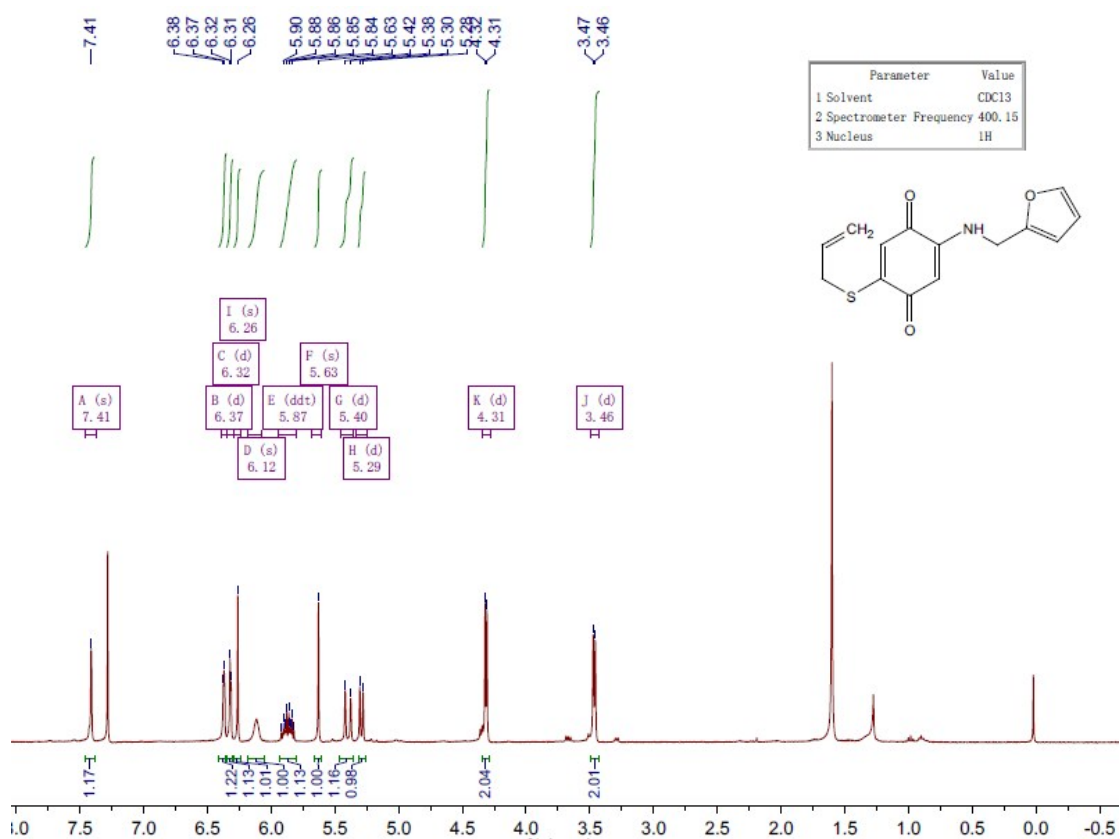

<sup>13</sup>C NMR (101 MHz, CDCl<sub>3</sub>) of **4ak**

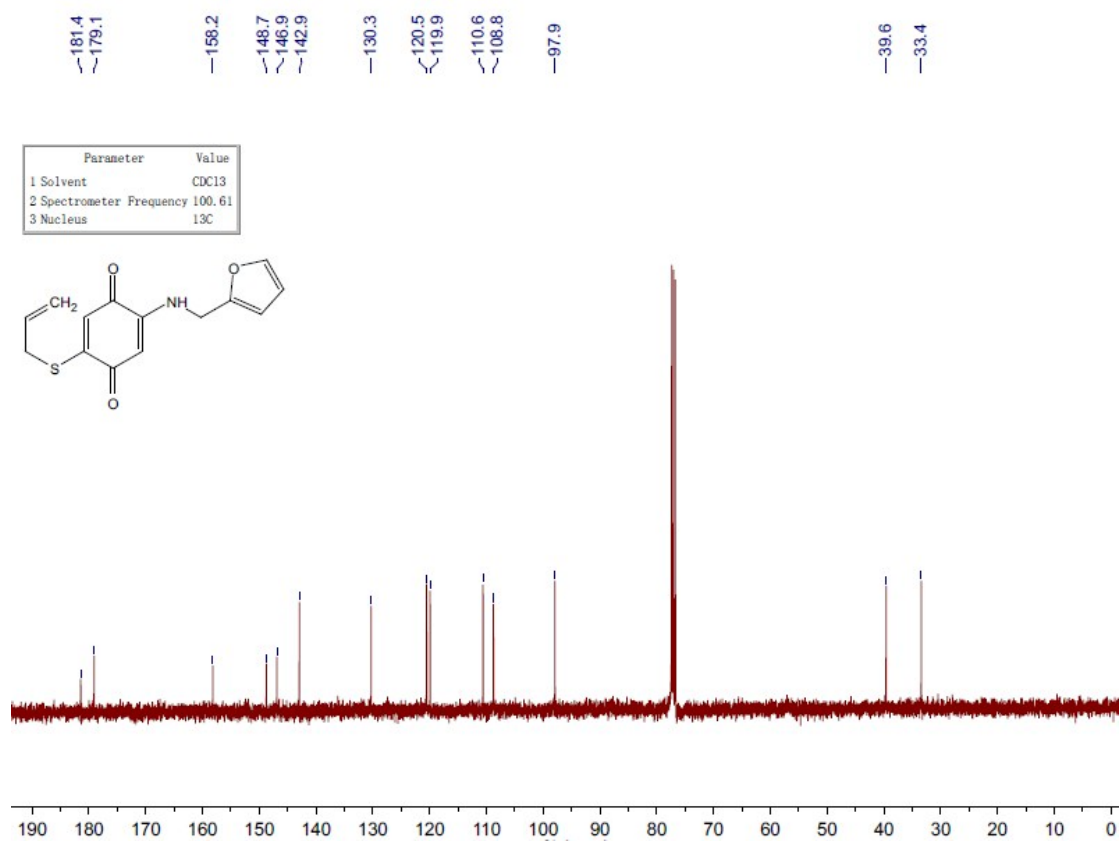



<sup>1</sup>H NMR (400 MHz, CDCl<sub>3</sub>) of **4al**

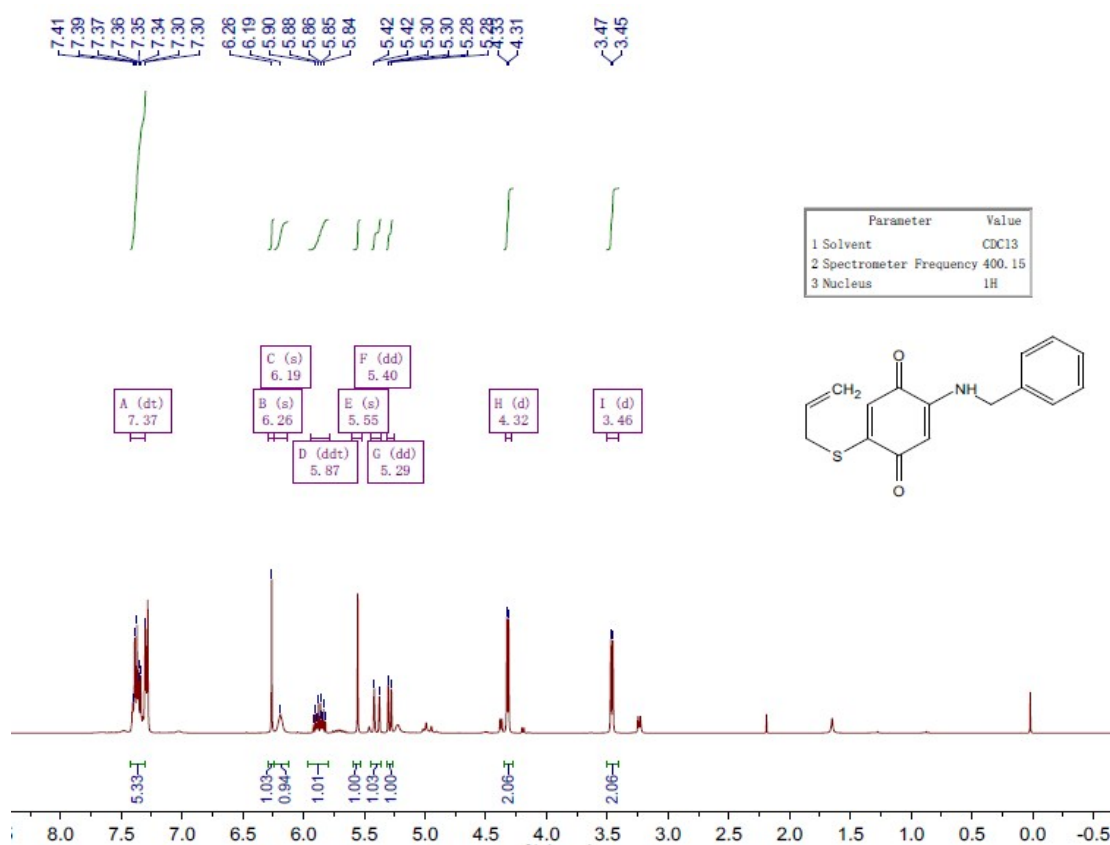

<sup>13</sup>C NMR (101 MHz, CDCl<sub>3</sub>) of **4al**

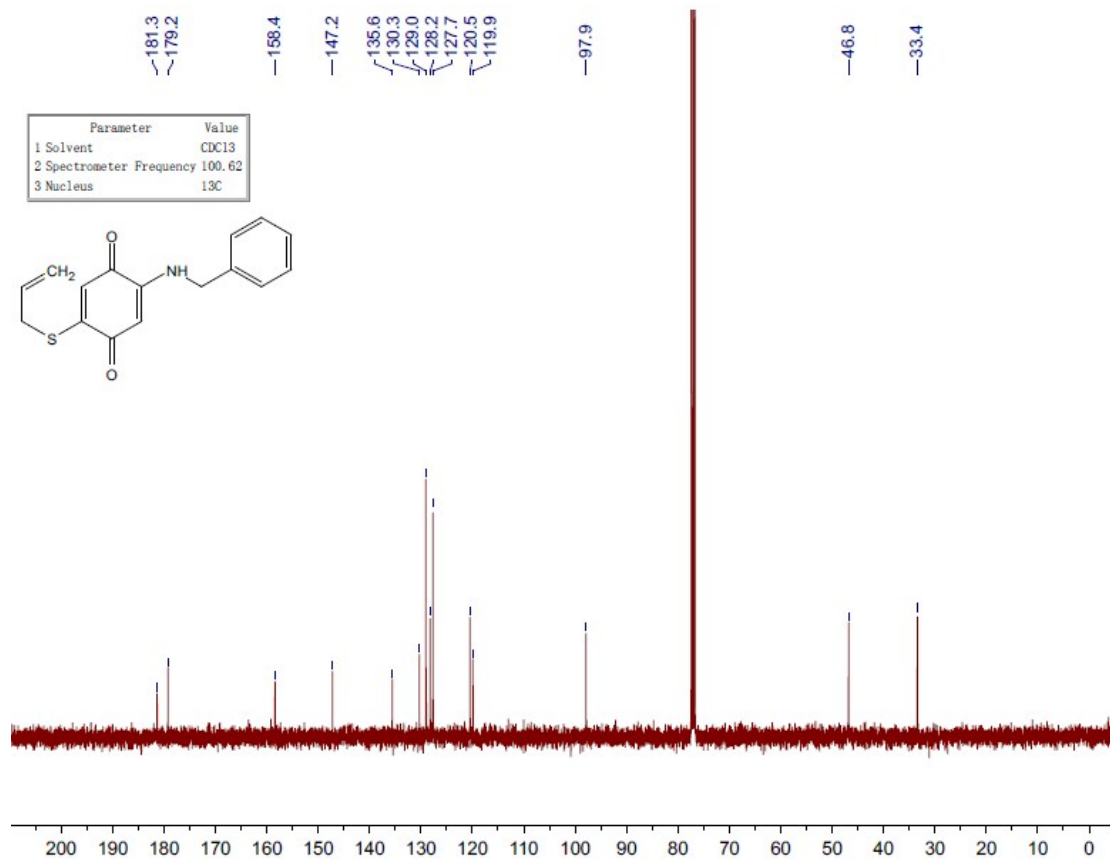

<sup>1</sup>H NMR (400 MHz, CDCl<sub>3</sub>) of **4am**

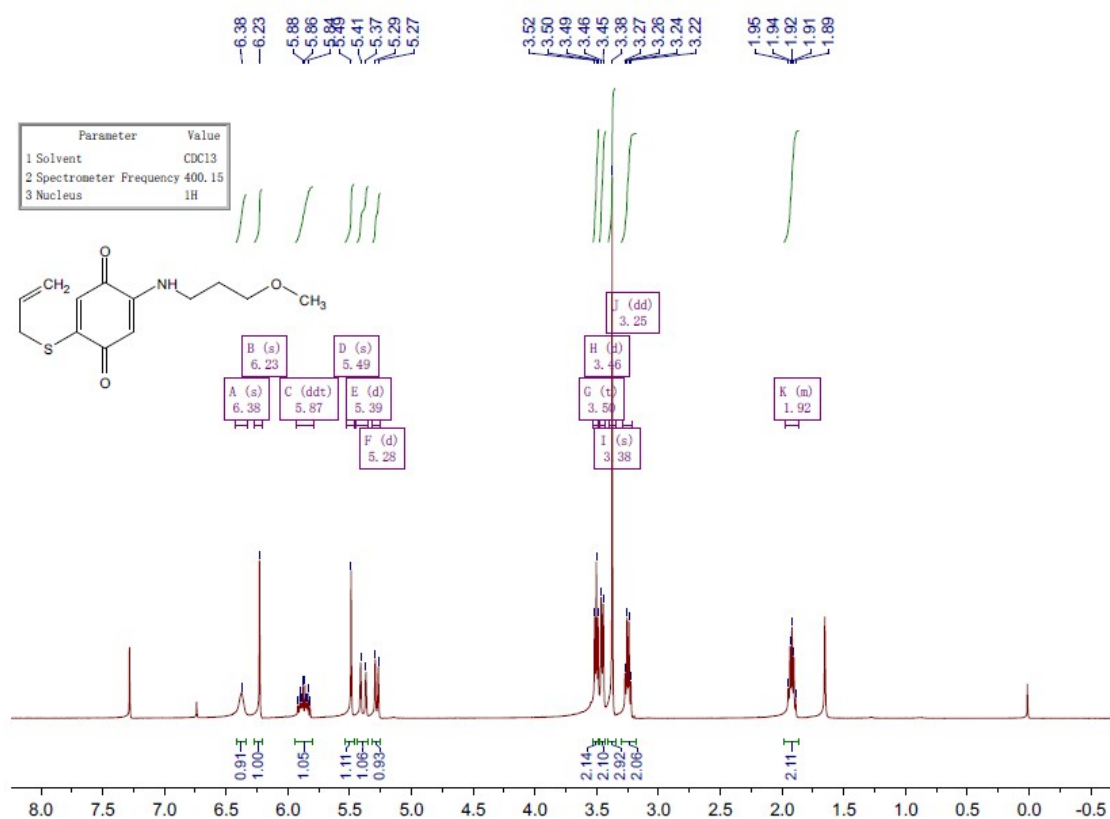

<sup>13</sup>C NMR (101 MHz, CDCl<sub>3</sub>) of **4am**

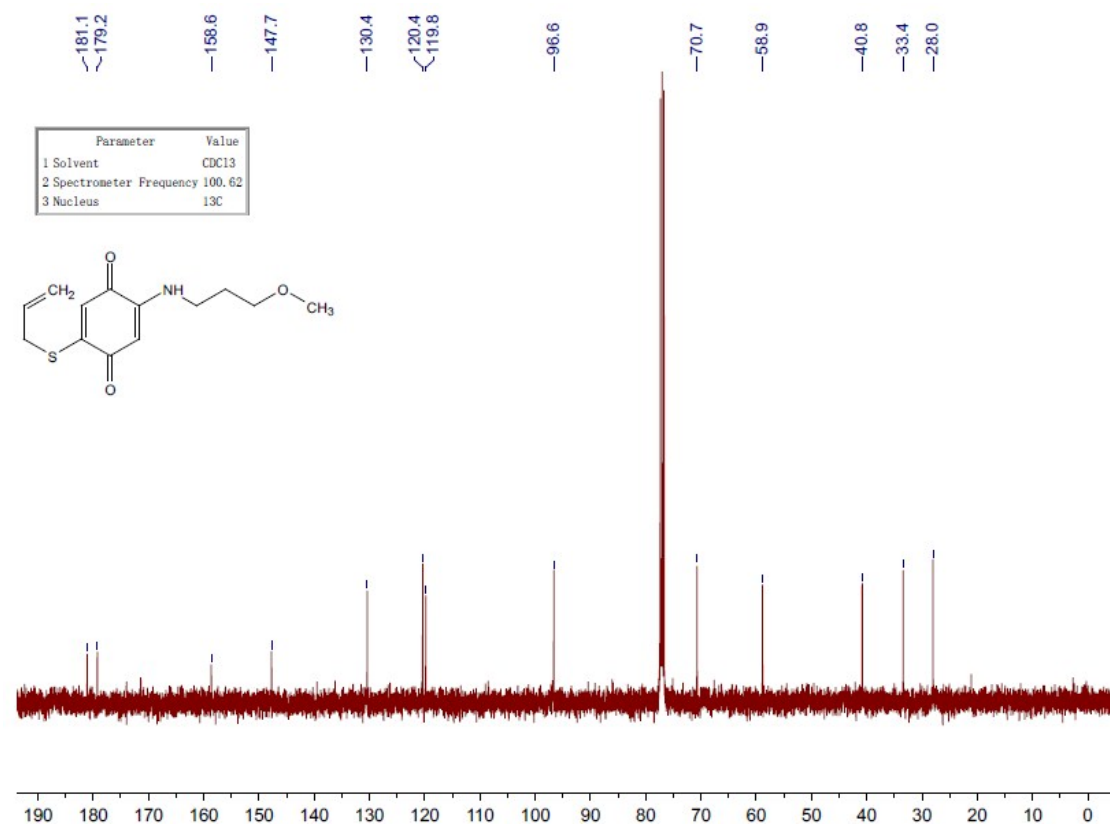

<sup>1</sup>H NMR (400 MHz, CDCl<sub>3</sub>) of **4an**

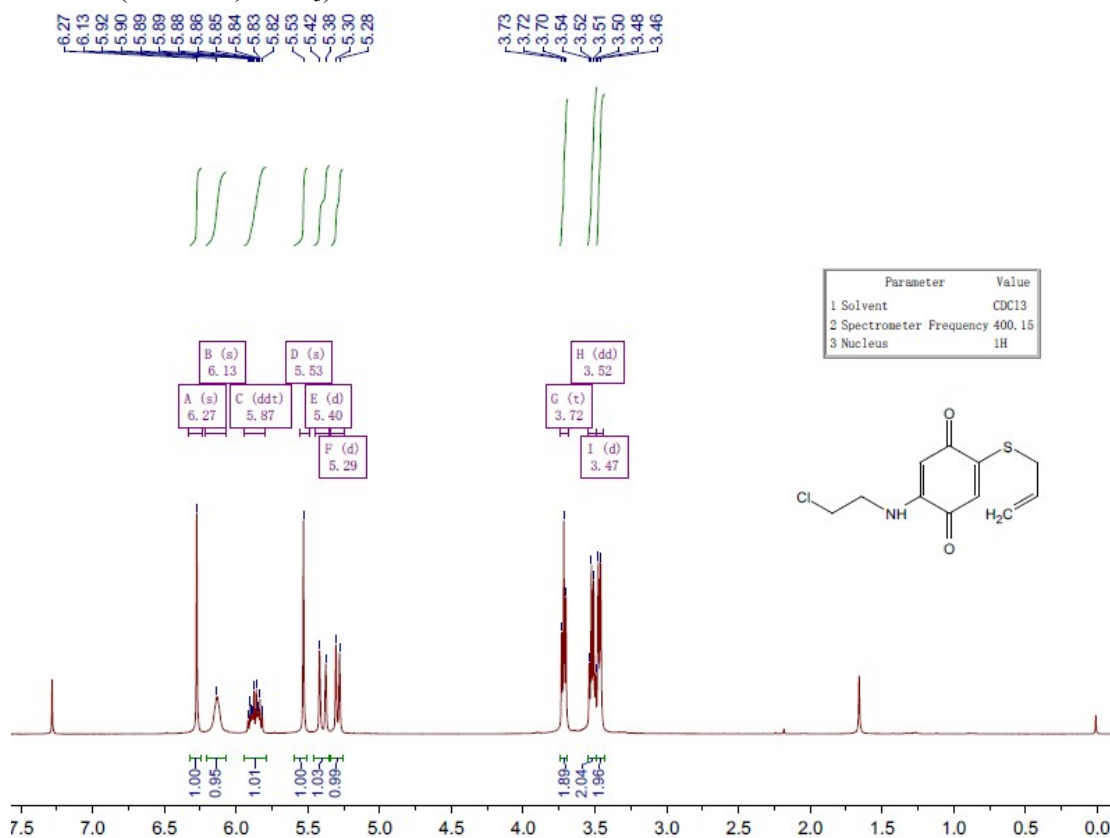

<sup>13</sup>C NMR (101 MHz, CDCl<sub>3</sub>) of **4an**

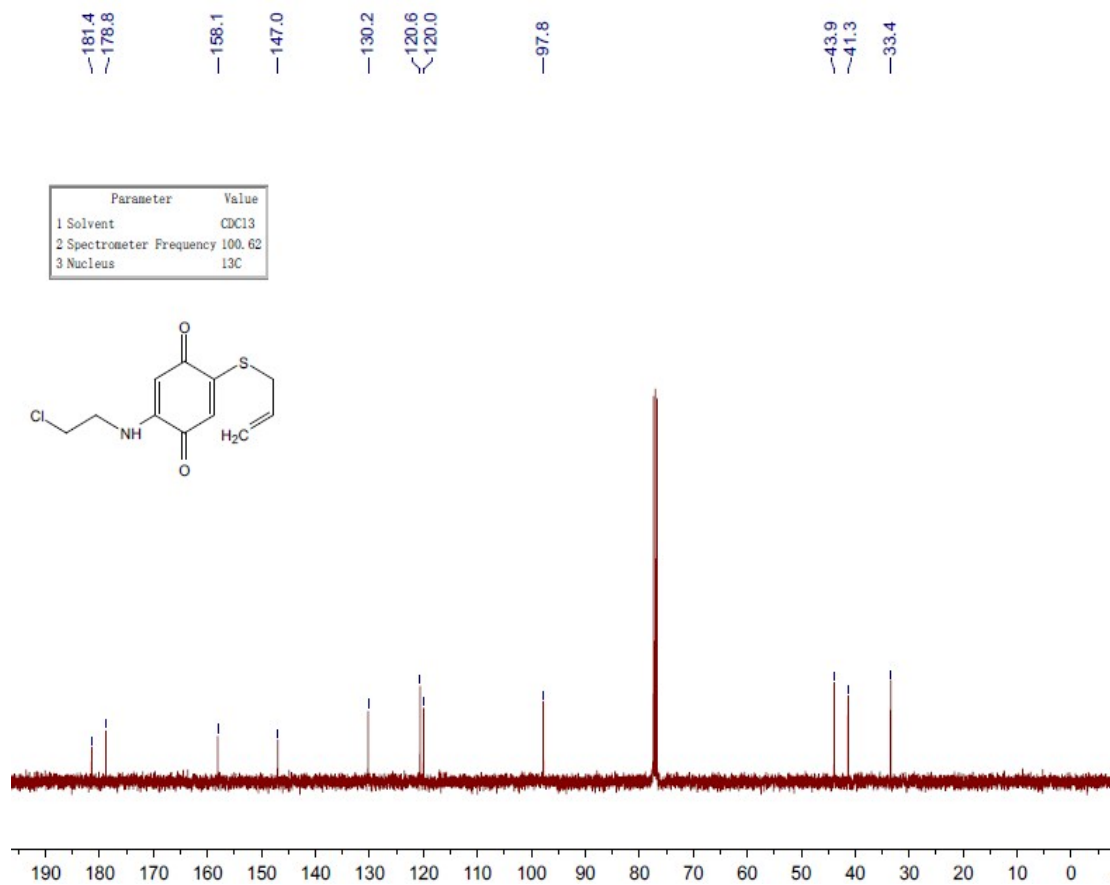

<sup>1</sup>H NMR (400 MHz, CDCl<sub>3</sub>) of **4ao**

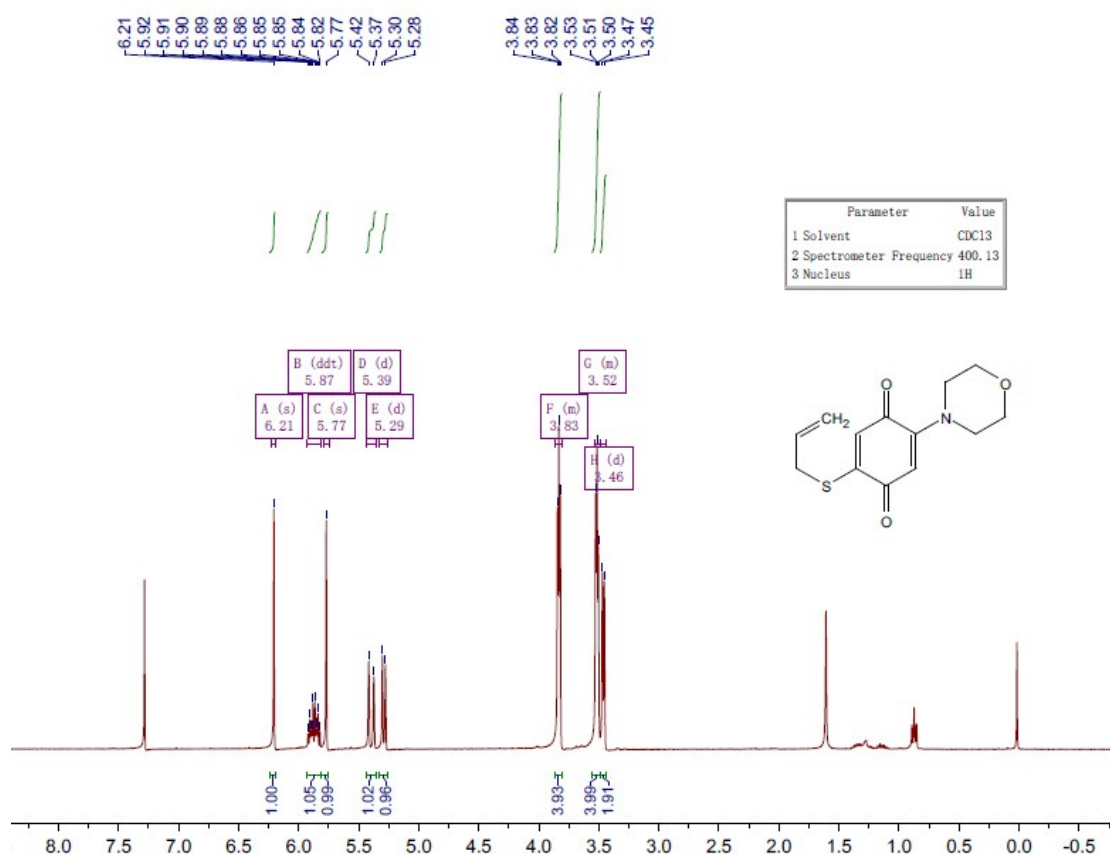

<sup>13</sup>C NMR (101 MHz, CDCl<sub>3</sub>) of **4ao**

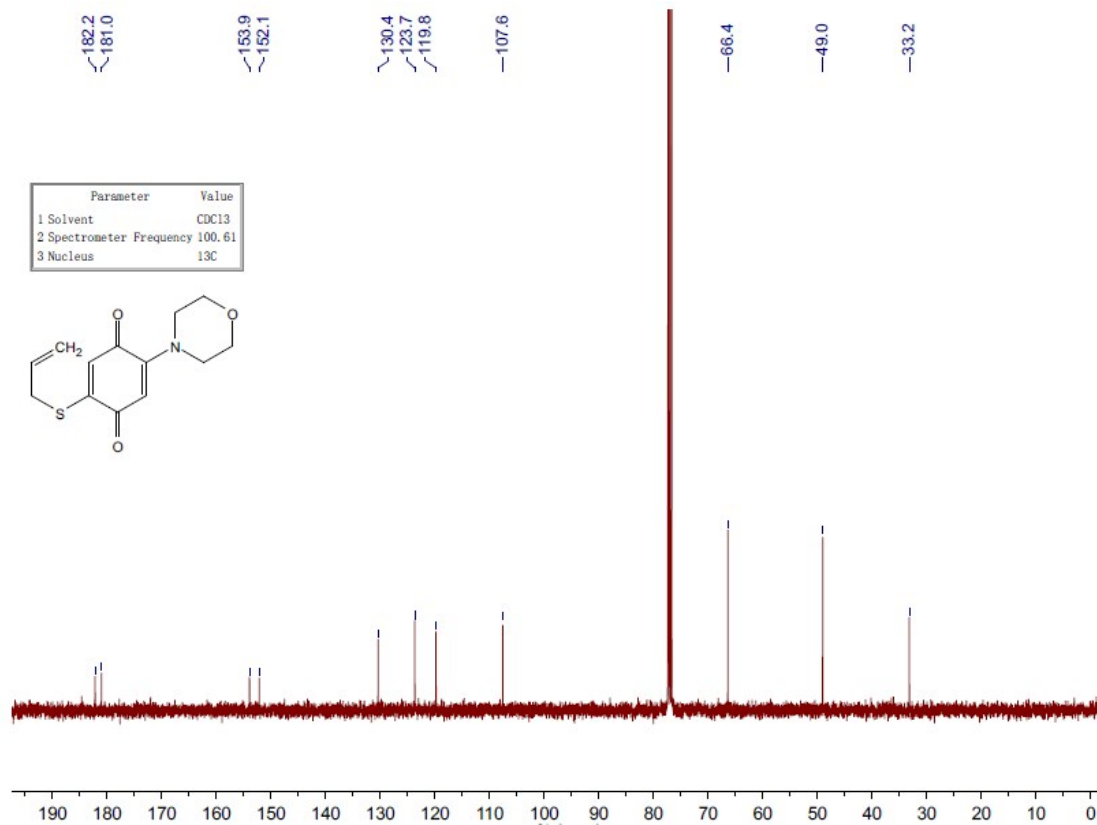

<sup>1</sup>H NMR (400 MHz, CDCl<sub>3</sub>) of **4ap**

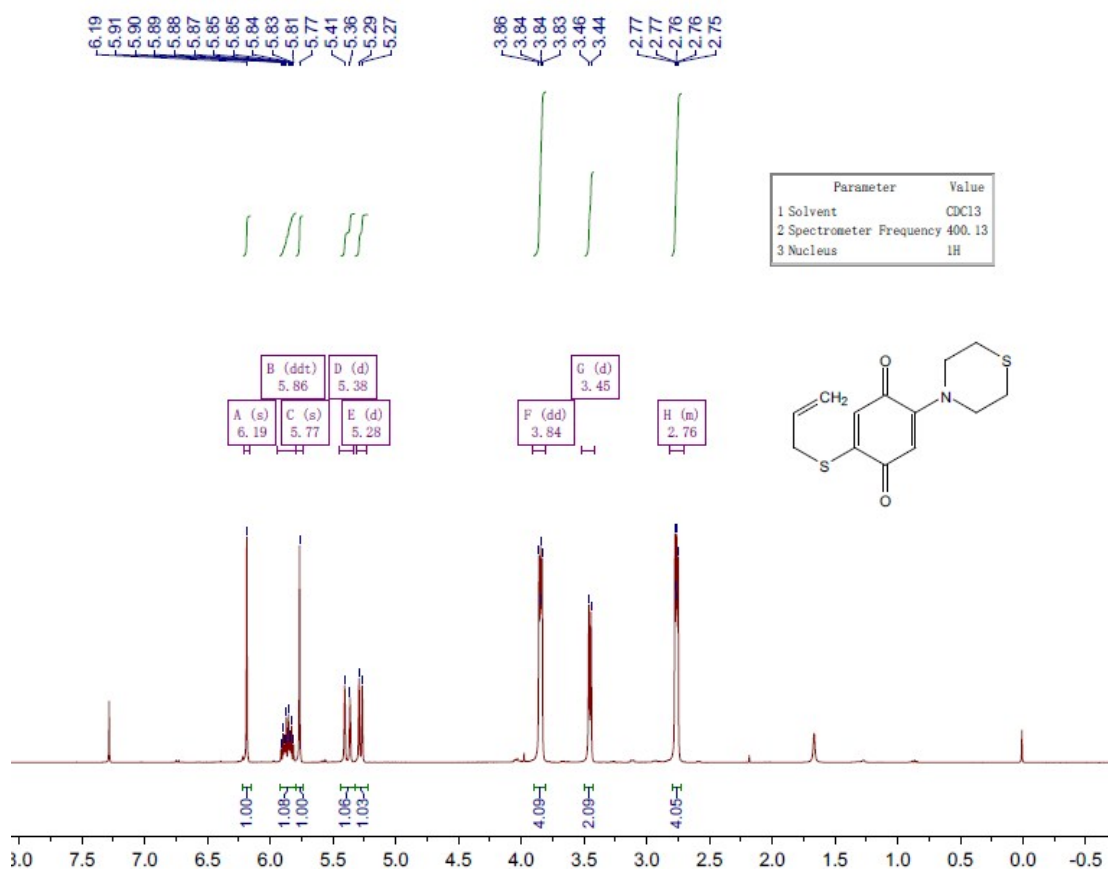

<sup>13</sup>C NMR (101 MHz, CDCl<sub>3</sub>) of **4ap**

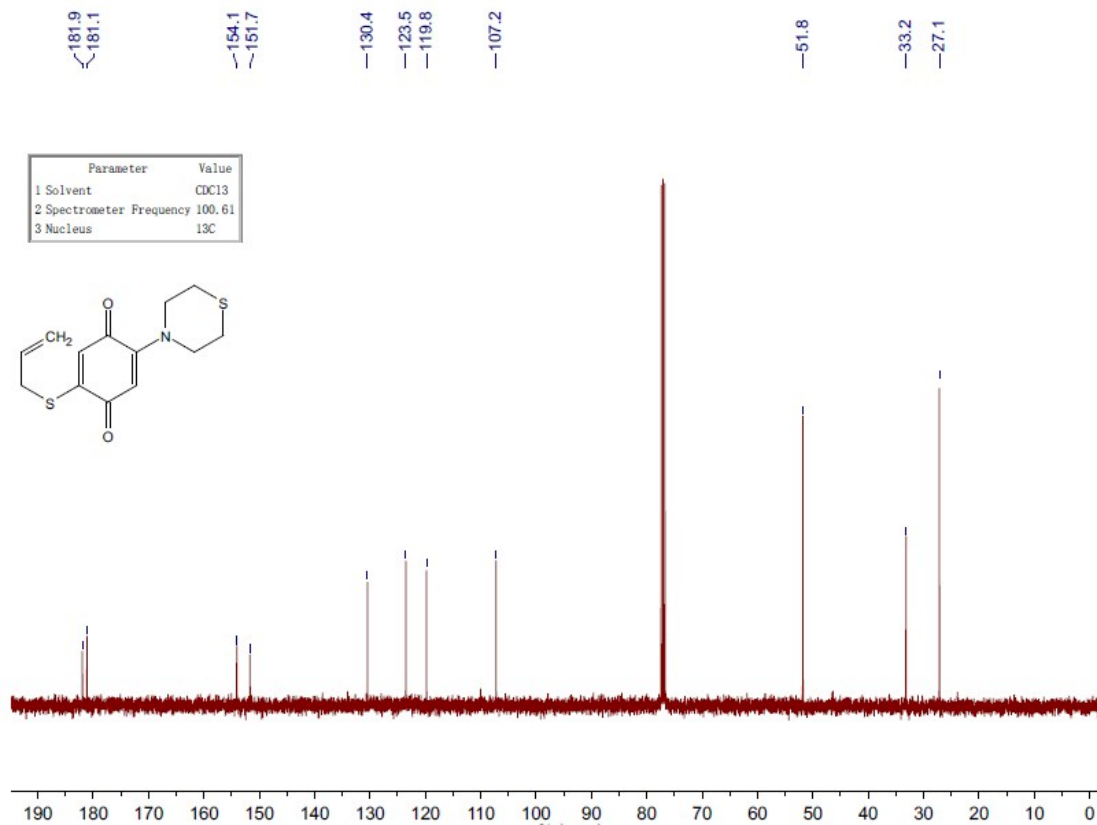

<sup>1</sup>H NMR (400 MHz, CDCl<sub>3</sub>) of **4aq**

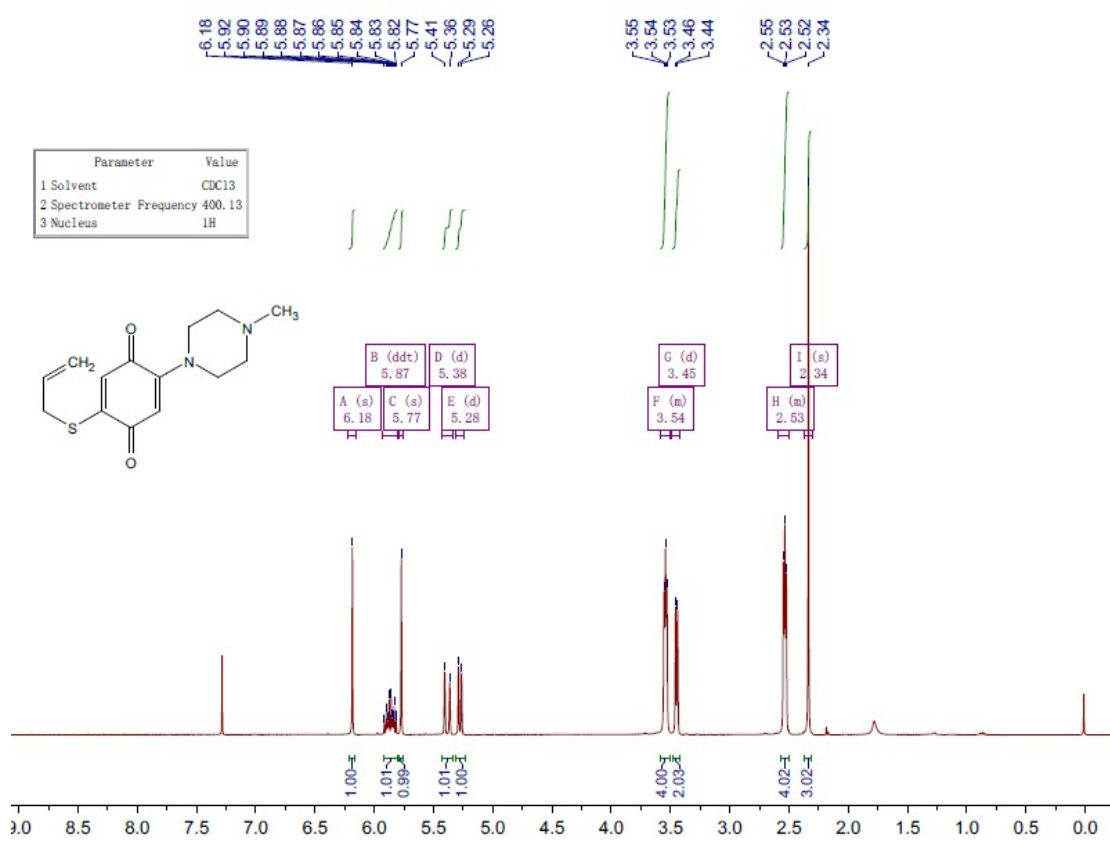

<sup>13</sup>C NMR (101 MHz, CDCl<sub>3</sub>) of **4aq**

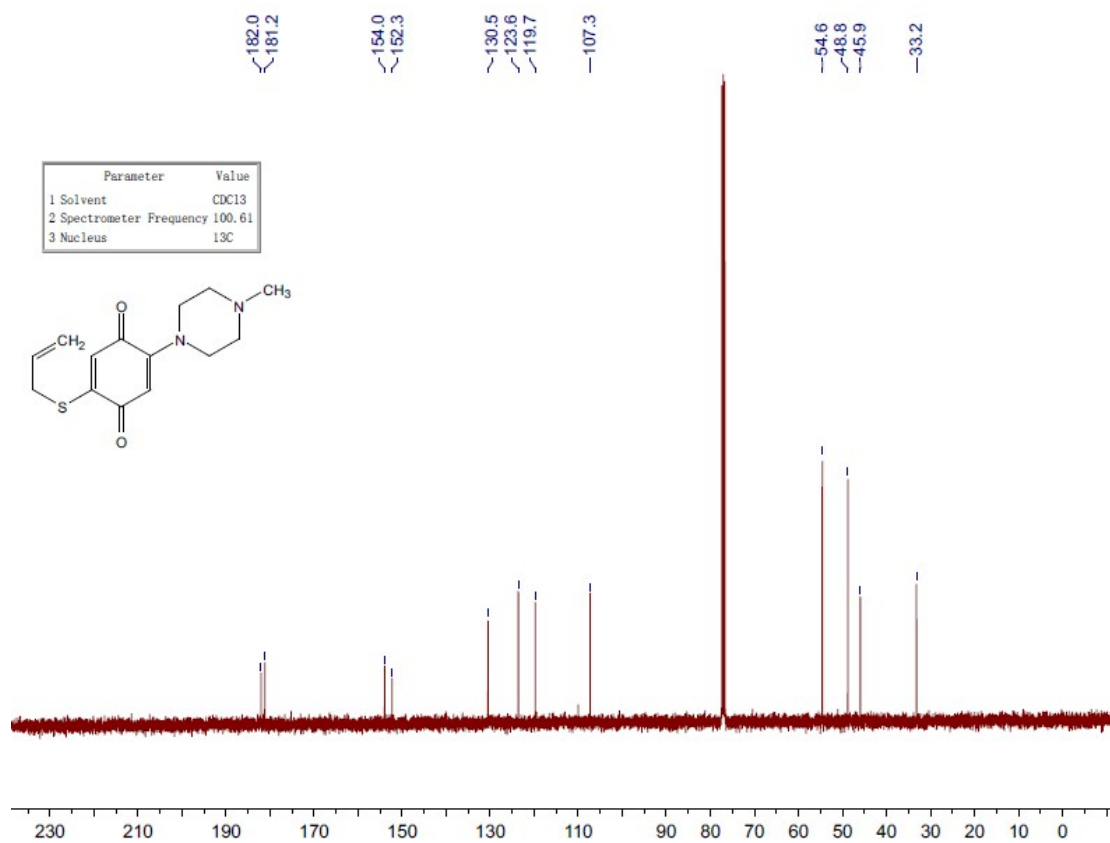

<sup>1</sup>H NMR (400 MHz, CDCl<sub>3</sub>) of **4ar**

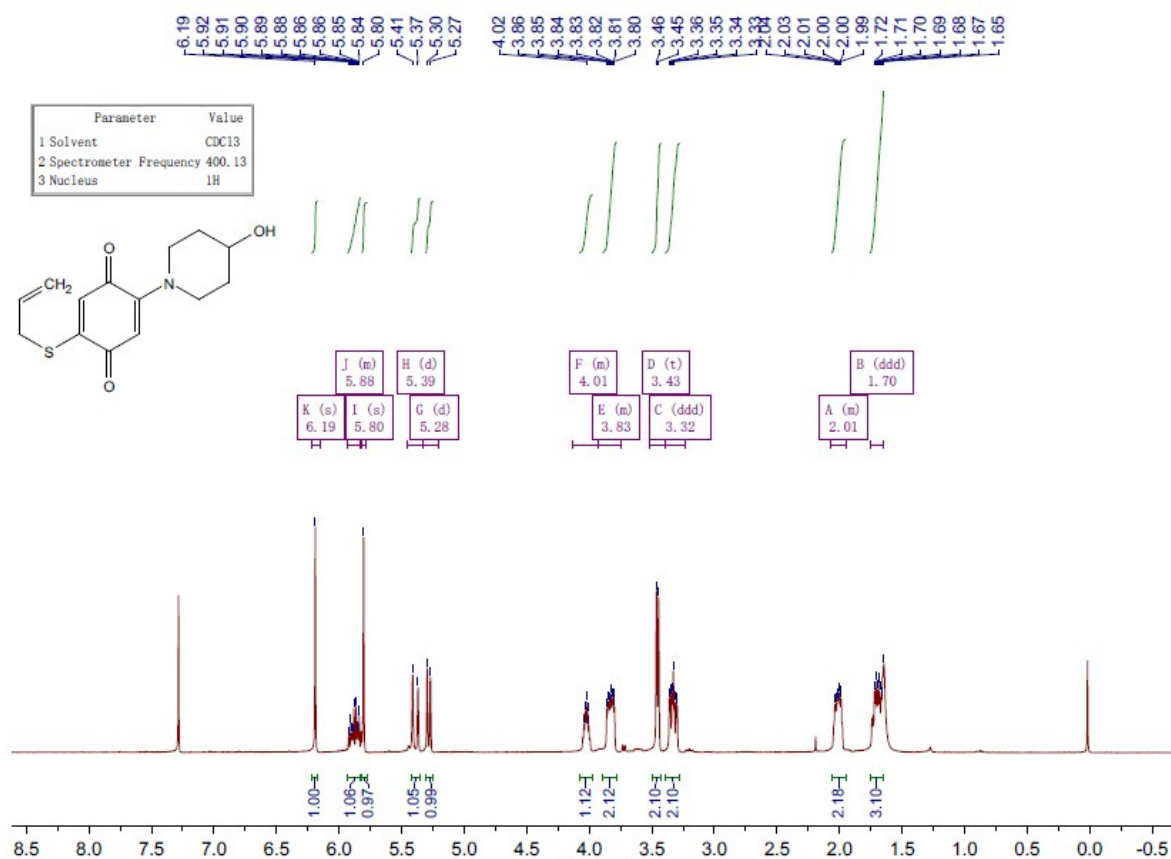

<sup>13</sup>C NMR (101 MHz, CDCl<sub>3</sub>) of **4ar**

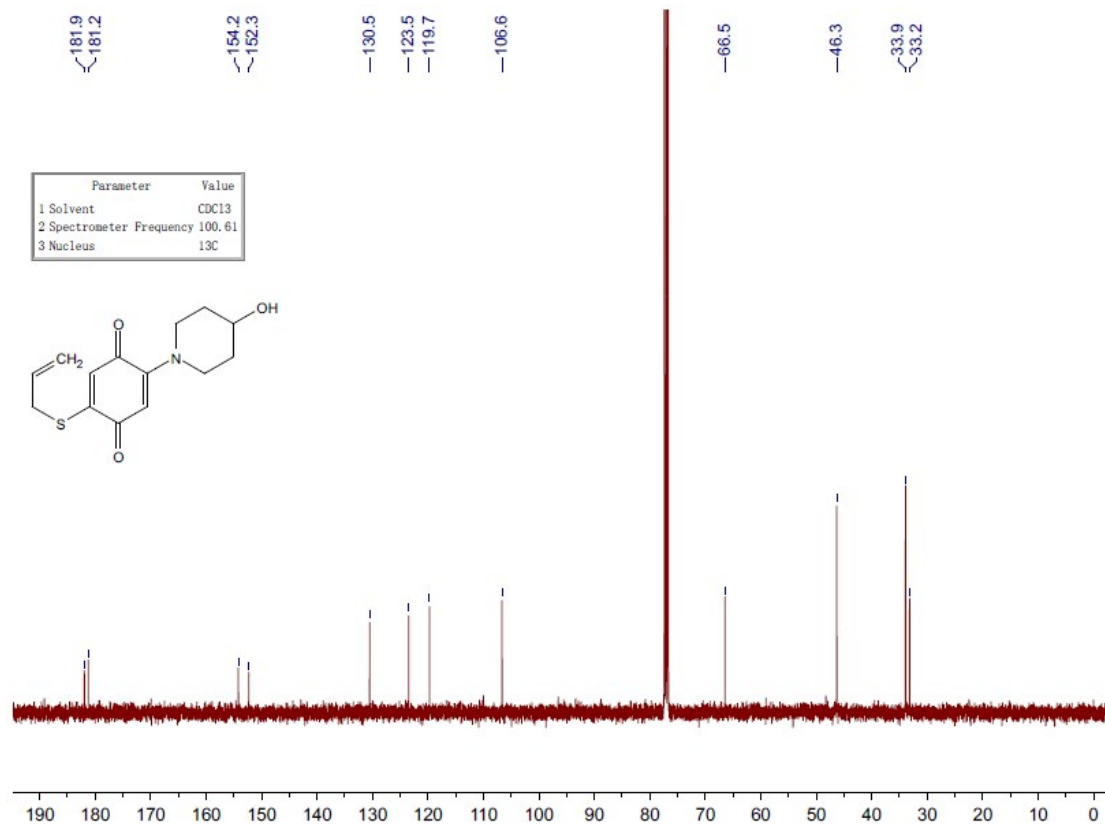

$^1\text{H}$  NMR (400 MHz,  $\text{CDCl}_3$ ) of **4as**

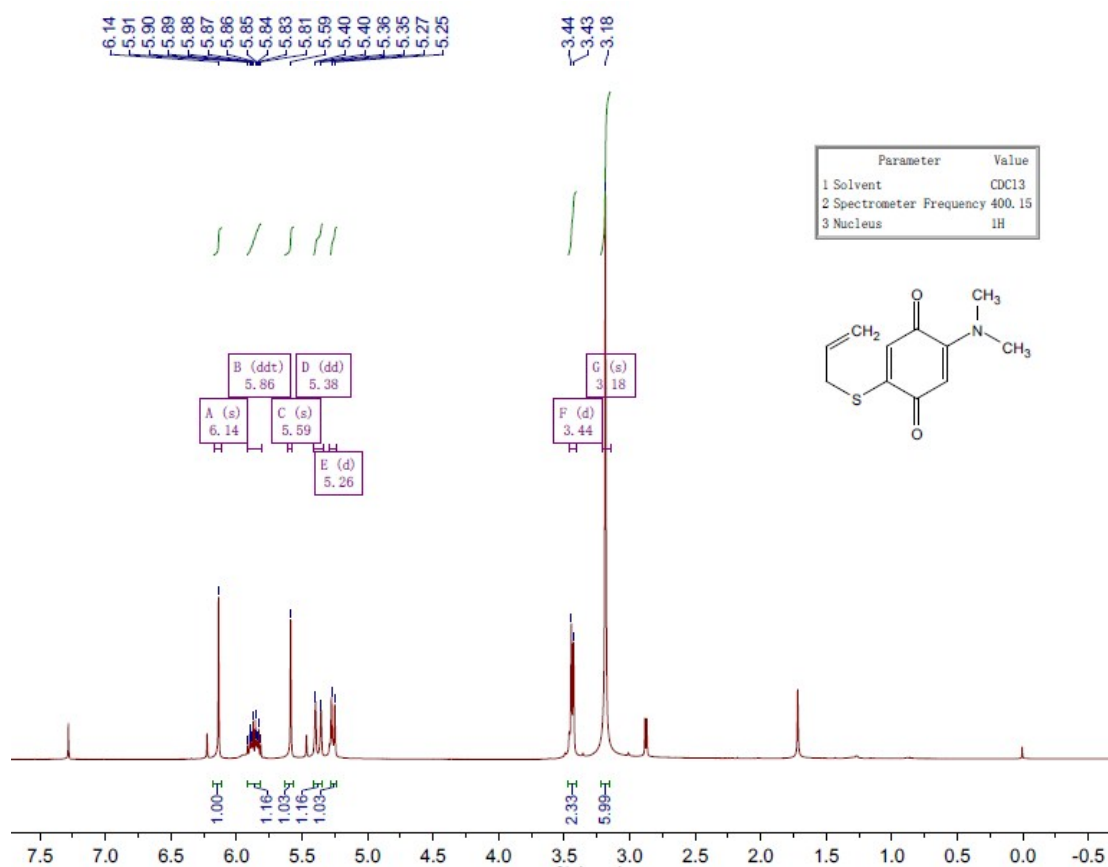

$^{13}\text{C}$  NMR (101 MHz,  $\text{CDCl}_3$ ) of **4as**

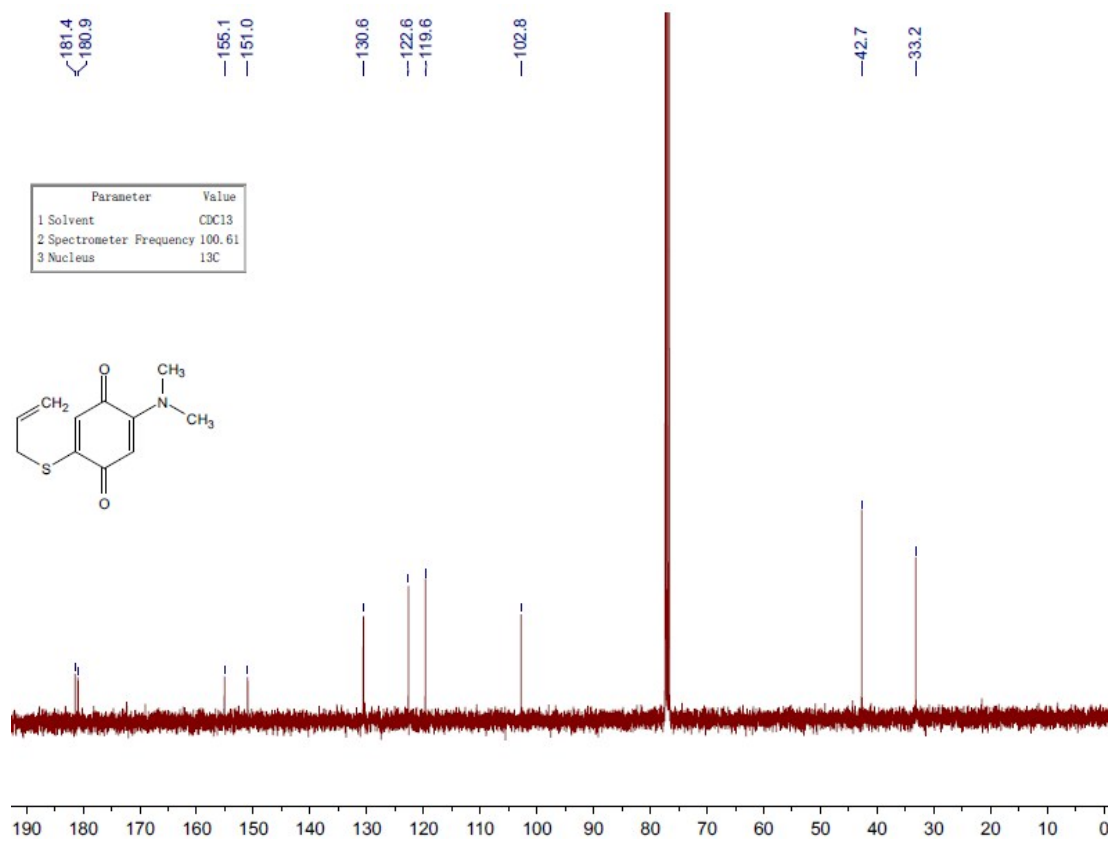



<sup>1</sup>H NMR (400 MHz, CDCl<sub>3</sub>) of **4mb**

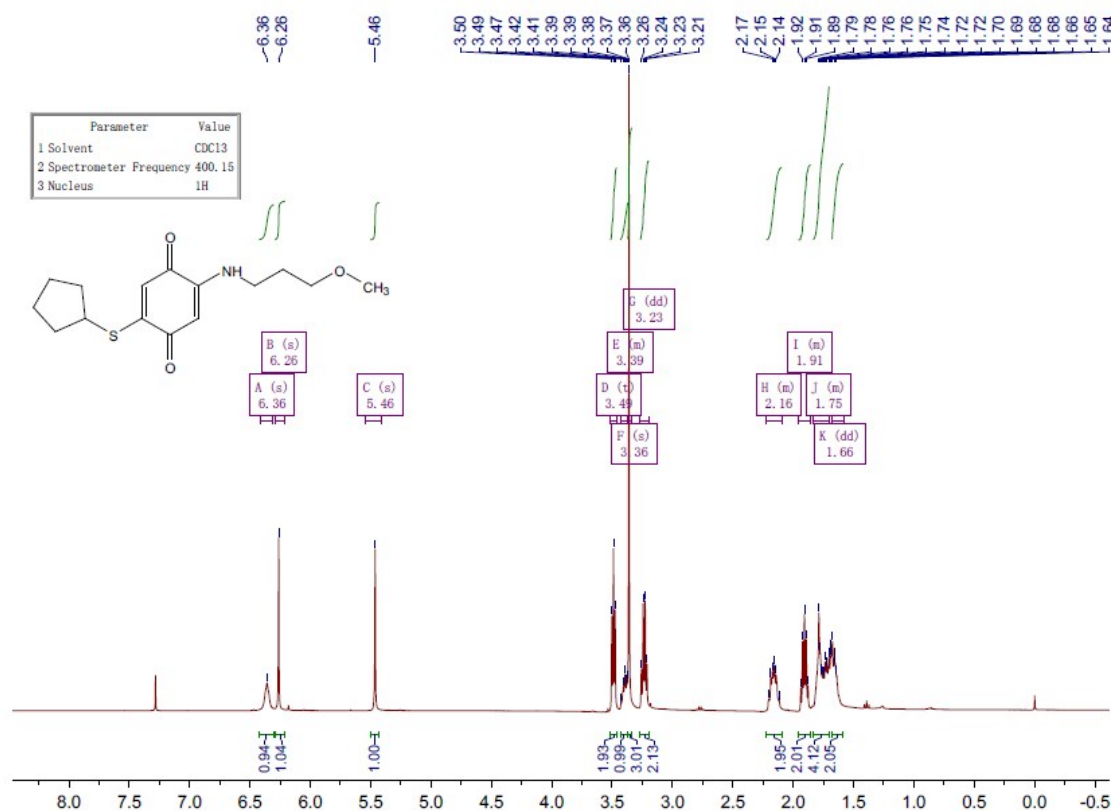

<sup>13</sup>C NMR (101 MHz, CDCl<sub>3</sub>) of **4mb**

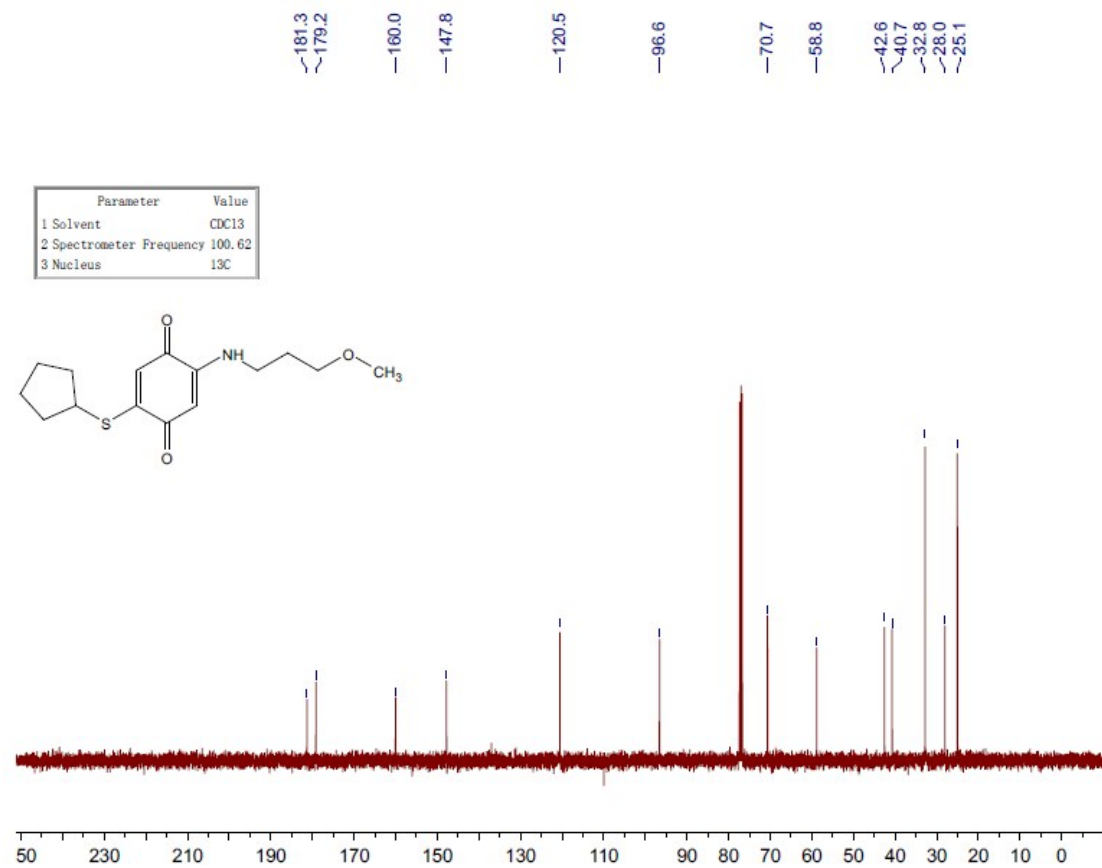

<sup>1</sup>H NMR (400 MHz, CDCl<sub>3</sub>) of **4mc**

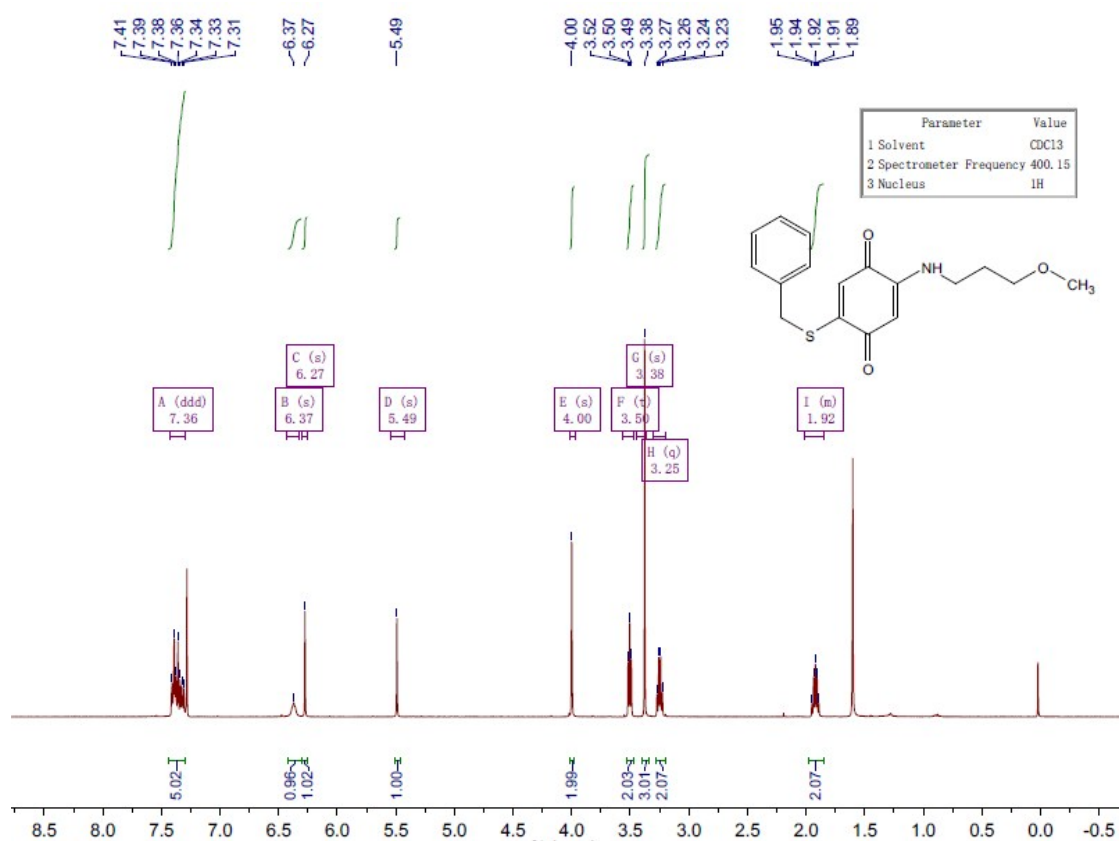

<sup>13</sup>C NMR (101 MHz, CDCl<sub>3</sub>) of **4mc**

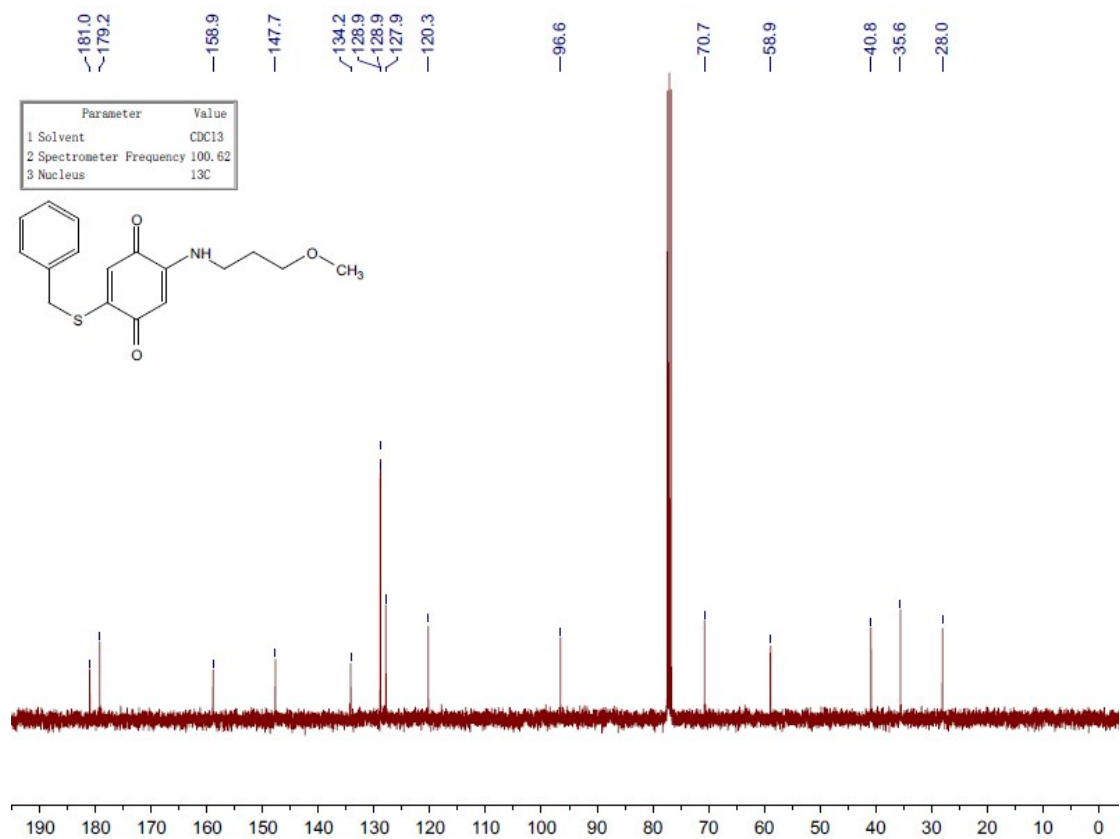

<sup>1</sup>H NMR (400 MHz, CDCl<sub>3</sub>) of **4md**

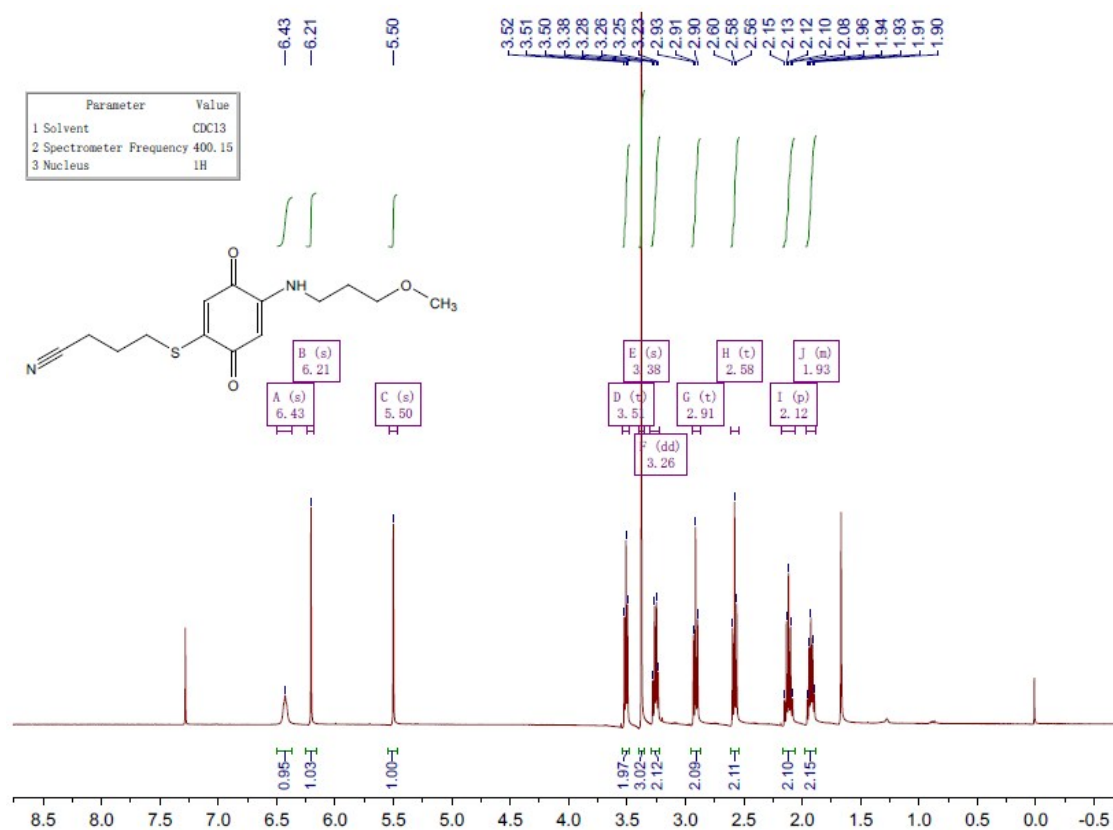

<sup>13</sup>C NMR (101 MHz, CDCl<sub>3</sub>) of **4md**

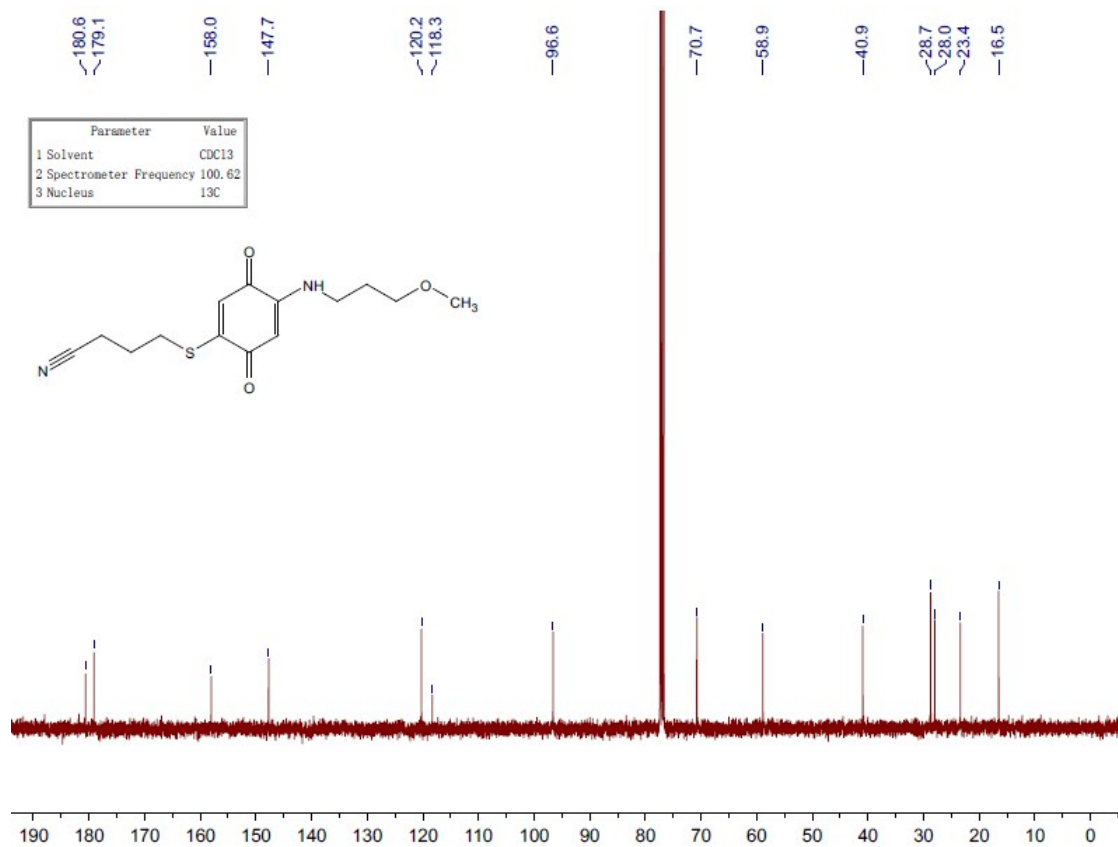

<sup>1</sup>H NMR (400 MHz, CDCl<sub>3</sub>) of **4me**

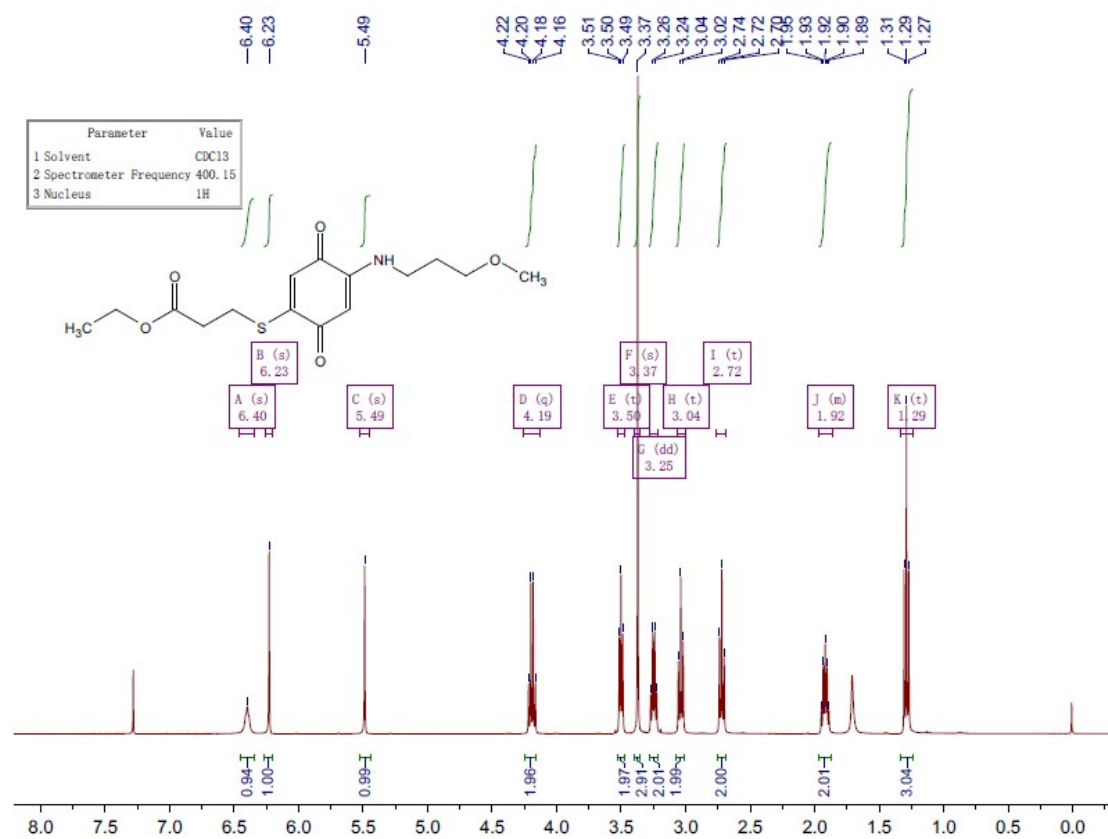

<sup>13</sup>C NMR (101 MHz, CDCl<sub>3</sub>) of **4me**

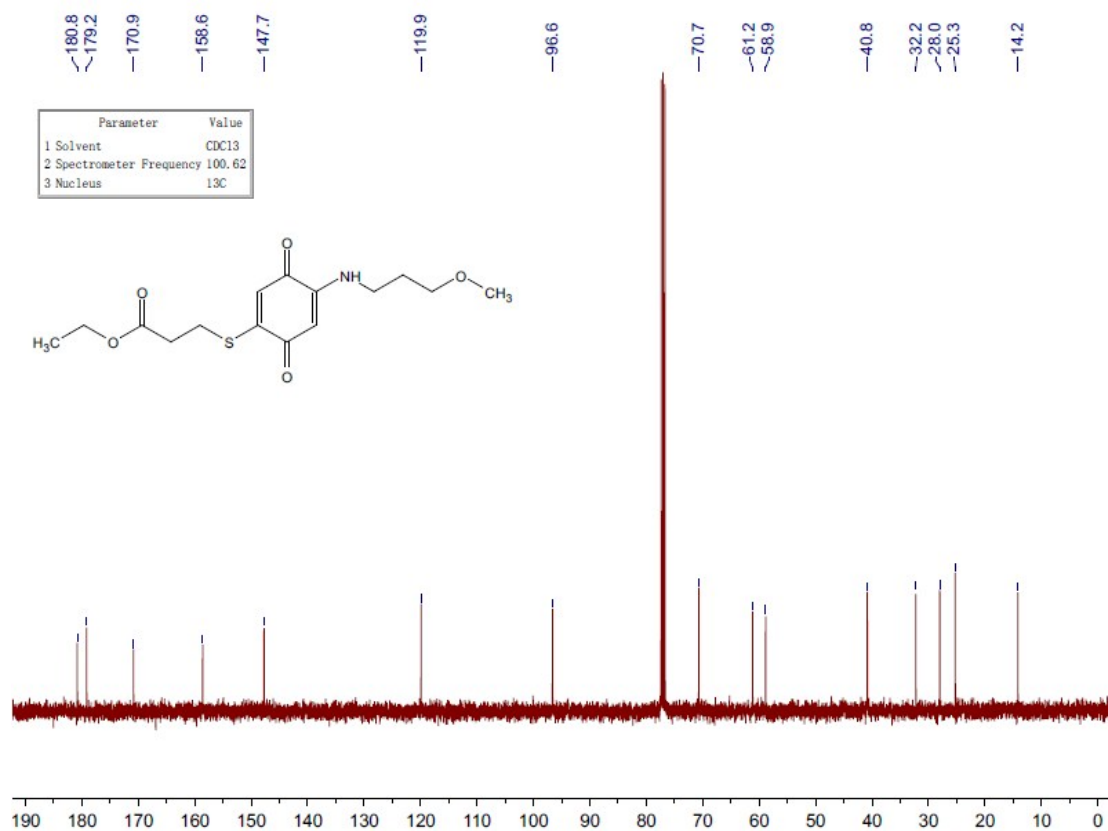

<sup>1</sup>H NMR (400 MHz, CDCl<sub>3</sub>) of **4mf**

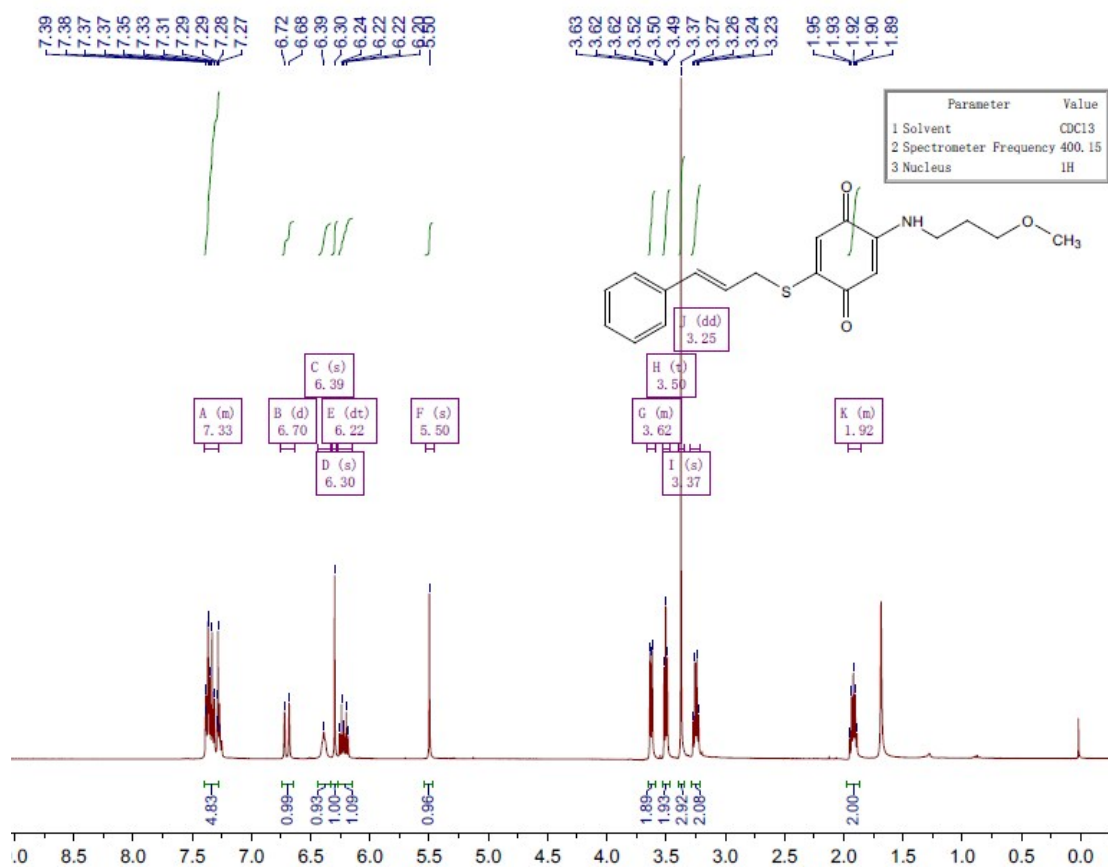

<sup>13</sup>C NMR (101 MHz, CDCl<sub>3</sub>) of **4mf**

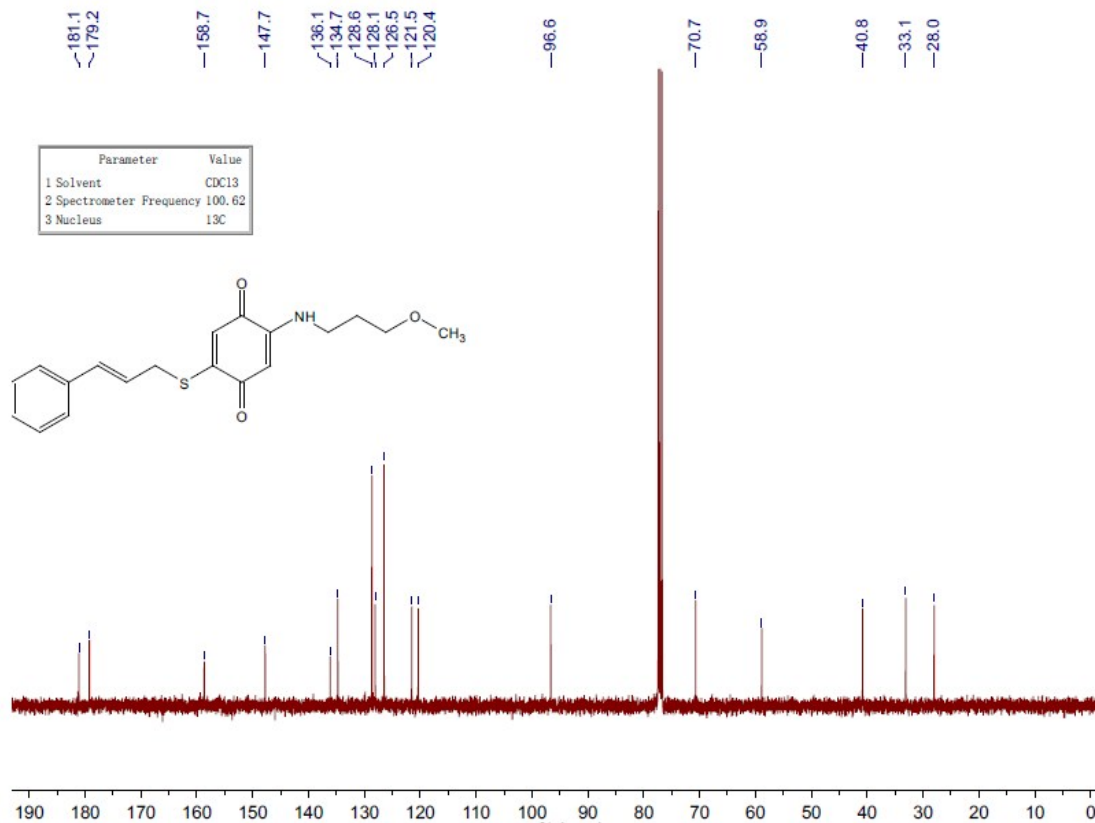

<sup>1</sup>H NMR (400 MHz, CDCl<sub>3</sub>) of **4mg**

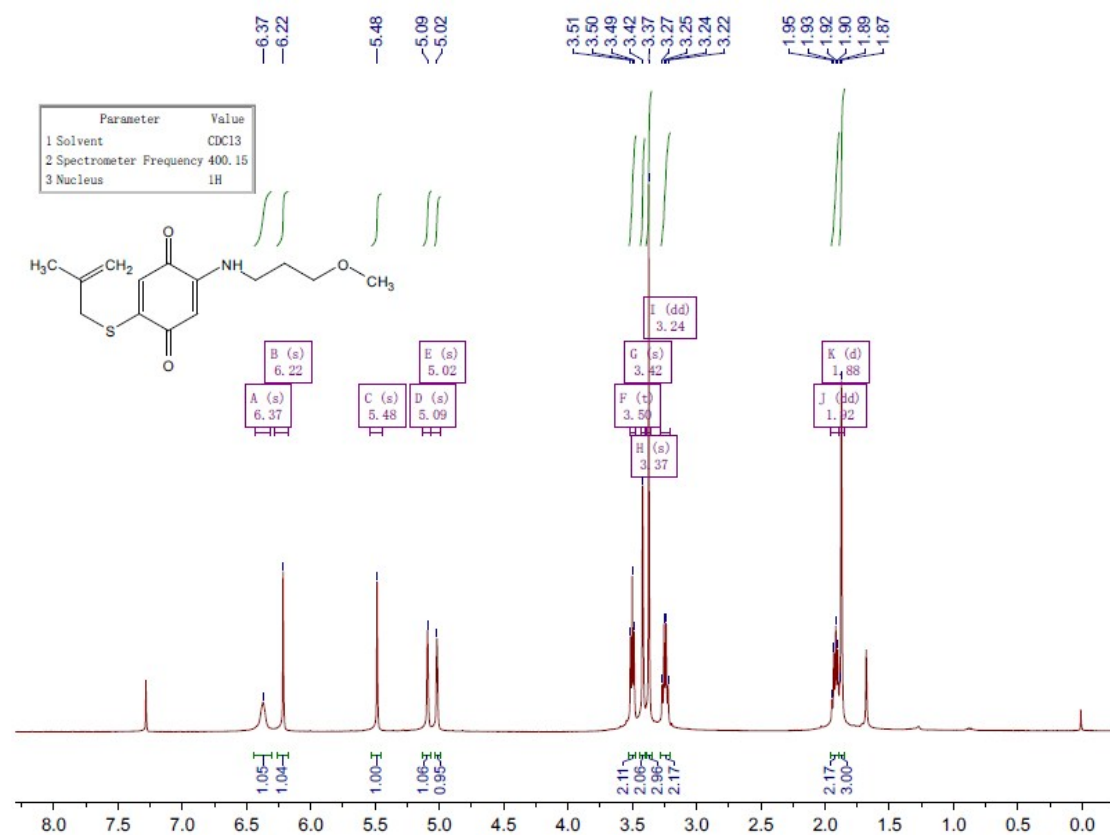

<sup>13</sup>C NMR (101 MHz, CDCl<sub>3</sub>) of **4mg**

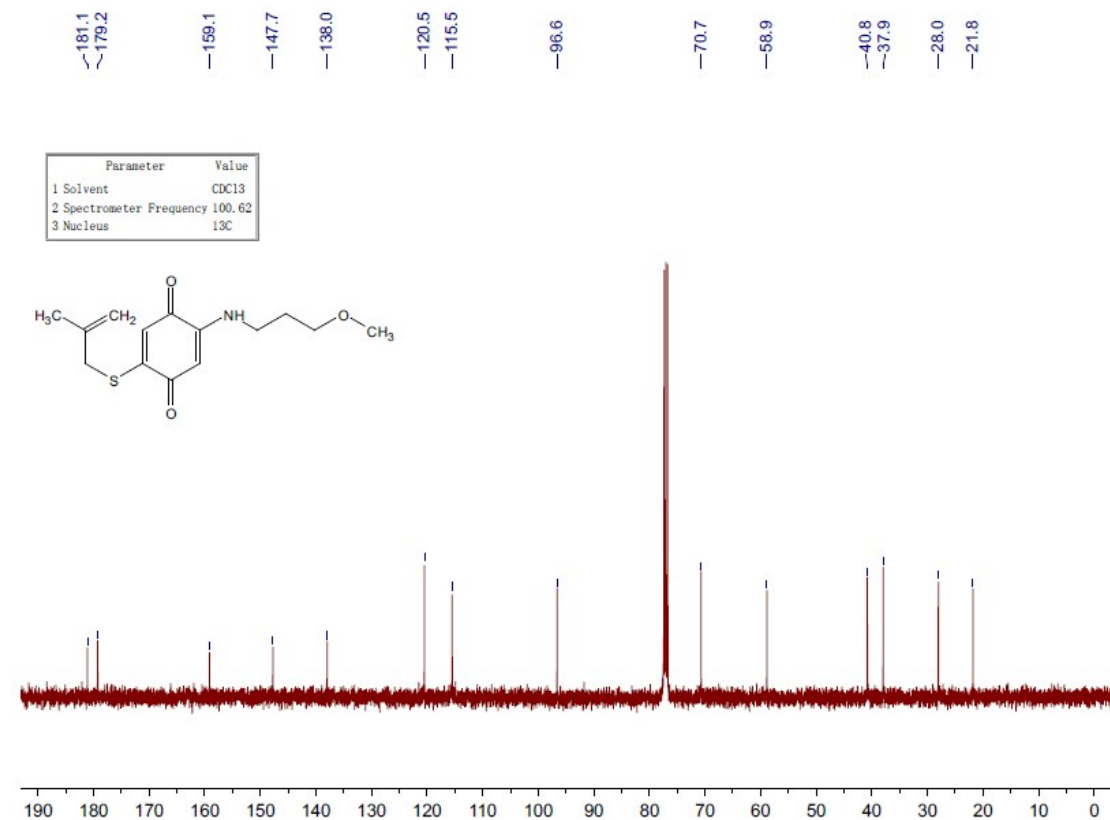

<sup>1</sup>H NMR (400 MHz, CDCl<sub>3</sub>) of **4mh**

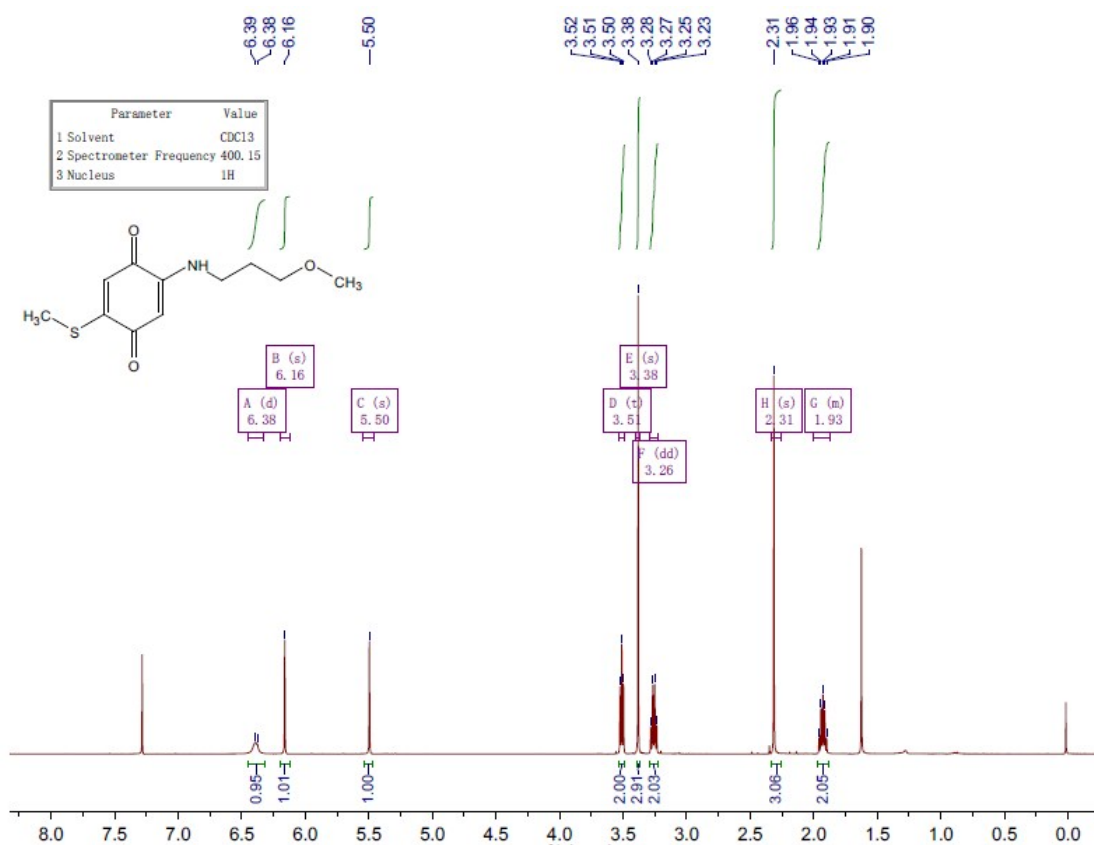

<sup>13</sup>C NMR (101 MHz, CDCl<sub>3</sub>) of **4mh**

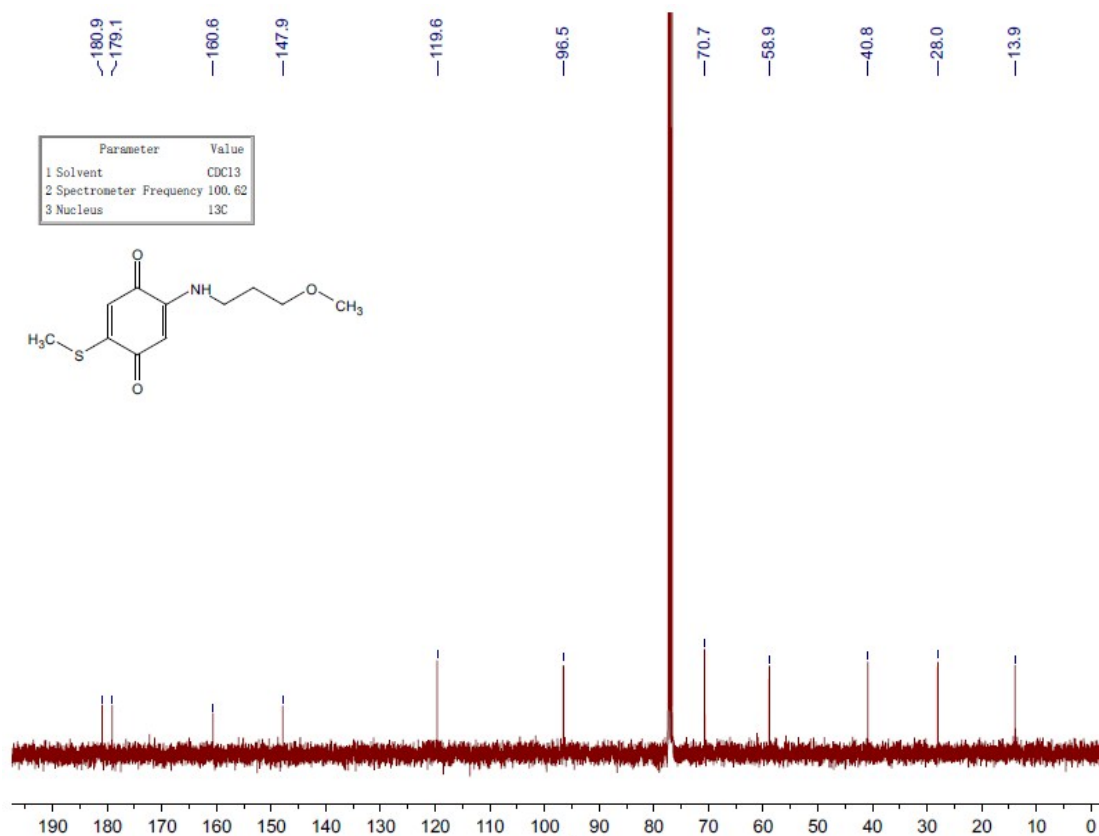

## References

- 1 R. R. Traut, A. Bollen, T. T. Sun, J. W. B. Hershey, J. Sundberg and R. Pierce, *Biochemistry*, 1973, 12, 3266-3273.
- 2 E. Miller, J. M. Sprague, L. W. Kissinger, L. F. McBurney, *J. Am. Chem. Soc.*, 1940, 62, 2099-2113.
- 3 Levanova, Grabel'nykh, Vakhrina, Russavskaya, Albanov, Korchevin, Rozentsveig, *Russ. J. Org. Chem.*, 2014, 50, 429 – 433.
- 4 J. J. Donleavy, *J. Am. Chem. Soc.*, 1936, 58, 1004-1005.
- 5 Margaret A. Brimble, Mark T. Brimble and Jennifer J. Gibson, *J. Chem. Soc. Perkin Trans. I*, 1989, 1, 179-184.
